# Supplementary material for: Green and controllable synthesis of symmetrical and unsymmetrical difluoromethylated diarylmethanes via a direct bisarylation strategy enabled by an HFIP–B(C6F5)3 adduct
Source: Royal Society of Chemistry journal article supplement (doi:10.1039/d4gc03917c), 2024-01-01

# Supporting Information (SI)

## Green and controllable synthesis of symmetrical and unsymmetrical difluoromethylated diarylmethanes via a direct bisarylation strategy enabled by HFIP–B(C<sub>6</sub>F<sub>5</sub>)<sub>3</sub> adduct

Xindi Li,<sup>a</sup> Yiping Zhu,<sup>a</sup> Zhina Gong,<sup>a</sup> Jinshan Li,<sup>\*a,b</sup> Jialin Xie,<sup>a,b</sup> Zhendong Zhao,<sup>c</sup> Jianwei Li<sup>d</sup> and Chunman Jia<sup>\*a,b,c</sup>

<sup>a</sup>*Hainan Provincial Key Lab of Fine Chem, School of Chemistry and Chemical Engineering, Hainan University, Haikou 570228, China.*

<sup>b</sup>*One Health Institute, Hainan University, Haikou 570228, China.*

<sup>c</sup>*Analytical & Testing Center, Hainan University, Haikou 570228, China*

<sup>d</sup>*MediCity Research Laboratory, University of Turku, Tykistökatu 6, Turku, 20520, Finland*

\*E-mail: lijinshan@hainanu.edu.cn

\*E-mail: jiachunman@hainanu.edu.cn

## Contents

|                                                                                                                                               |         |
|-----------------------------------------------------------------------------------------------------------------------------------------------|---------|
| 1. General information.....                                                                                                                   | S2      |
| 2. General procedure for synthesis of symmetrical difluoromethylated diarylmethanes and analogues (3a-3t).....                                | S2      |
| 3. General procedure for synthesis of unsymmetrical difluoromethylated diarylmethanes (5a-5o).....                                            | S2      |
| 4. Recyclability and reusability of the HFIP solvent in the gram-scale experiment and transformation of difluoromethylated diarylmethane..... | S3      |
| 5. Mechanistic investigation by NMR experiments.....                                                                                          | S4-S10  |
| 6. Unsuccessful substrates.....                                                                                                               | S10     |
| 7. Control experiments.....                                                                                                                   | S10-S11 |
| 8. Characterization data of the products.....                                                                                                 | S11-S23 |
| 9. NMR spectra of the related compounds.....                                                                                                  | S24-S77 |

## 1. General information

Unless otherwise indicated, all reactions were carried out in air. All reagents and solvents were obtained commercially and used as received without further purification. Analytical thin layer chromatography was performed on 0.20 mm Qingdao Haiyang silica gel plates. Silica gel (200–300 mesh) (from Qingdao Haiyang Chem. Company, Ltd.) was used for flash chromatography.  $^1\text{H}$ ,  $^{13}\text{C}$  and  $^{19}\text{F}$  were recorded on Bruker AV 400 MHz instrument at 400 MHz ( $^1\text{H}$  NMR), 100 MHz ( $^{13}\text{C}$  NMR), as well as 376 MHz ( $^{19}\text{F}$  NMR). Chemical shifts were reported in ppm down field from internal  $\text{Me}_4\text{Si}$  and external  $\text{CCl}_3\text{F}$ , respectively.  $\text{CDCl}_3$  (7.26 ppm for  $^1\text{H}$  NMR, 77.0 ppm for  $^{13}\text{C}$  NMR) was used as a reference. Data for  $^1\text{H}$  were reported as follows: chemical shift (ppm), multiplicity (s = singlet, d = doublet, t = triplet, q = quartet, dd = doublet of doublets, m = multiplet, br = broad singlet), coupling constants (Hz), and integration. Data for  $^{13}\text{C}$  NMR were reported as ppm. High-resolution mass spectra analyses were performed on a Waters SYNAPT G2-Si Q-TOF mass spectrometer. Melting points were determined using a X-4 digital micro melting point apparatus. Thin-layer chromatography (TLC) was performed, and visualization of the compounds was accomplished with UV light (254 nm). Flash column chromatography was performed on silica gel (200–300 mesh).

## 2. General procedure for synthesis of symmetrical difluoromethylated diarylmethanes and analogues (3a-3t)

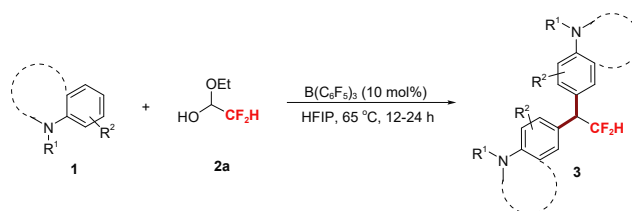

To a 25 mL Schlenk tube was added aniline **1** (1.05 mmol, 2.1 equiv.) and **2a** (0.5 mmol, 63.1 mg, 1.0 equiv.) and  $\text{B}(\text{C}_6\text{F}_5)_3$  (0.05 mmol, 25.6 mg, 0.1 equiv.), then 2.5 mL HFIP was added. The resulting mixture was stirred at  $65\text{ }^\circ\text{C}$  in an oil bath until the completion of the reaction (monitored by TLC, approximately 12–24 hours). Then the mixture was concentrated under reduced pressure. The residue was purified by column chromatography to afford the desired products **3**, using the indicated eluent.

## 3. General procedure for synthesis of unsymmetrical difluoromethylated diarylmethanes (5a-5o)

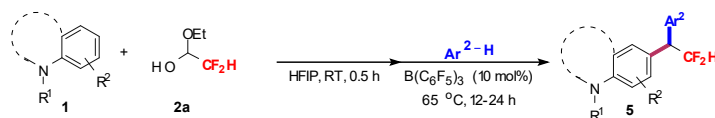

To a 25 mL Schlenk tube was added aniline **1** (0.5 mmol, 1.0 equiv.) and **2a** (0.5 mmol, 63.1 mg, 1.0 equiv.) and HFIP (2.5 mL). The resulting mixture was stirred at room temperature until the completion of the reaction (monitored by TLC, approximately 0.5–1.0 hour). Then another arene (indole or aniline 0.55 mmol, 1.1 equiv.) and  $\text{B}(\text{C}_6\text{F}_5)_3$  (0.05 mmol, 25.6 mg, 0.1 equiv.) were added. The resulting mixture was stirred at  $65\text{ }^\circ\text{C}$  in an oil bath until the completion of the reaction (monitored by TLC, approximately 12–24 hours). Then the mixture was concentrated under reduced pressure. The residue was purified by column chromatography to afford the desired products **5**, using the indicated eluent.

#### 4. Recyclability and reusability of the HFIP solvent in the gram-scale experiment and transformation of difluoromethylated diarylmethane

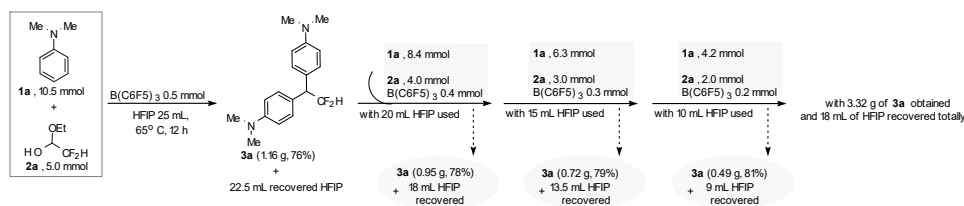

##### Initial reaction

To a 100 mL Schlenk tube added *N,N*-dimethylaniline **1a** (1.27 g, 10.5 mmol, 2.1 equiv.) and difluoroacetaldehyde ethyl hemiacetal **2a** (0.63 g, 5.0 mmol, 1.0 equiv.) and  $B(C_6F_5)_3$  (0.5 mmol, 0.26 g, 0.1 equiv.) in 25 mL of HFIP. The resulting mixture was stirred at 65 °C in an oil bath. After completion of the reaction (monitored by TLC) the HFIP solvent was recovered by distillation directly from the reaction pot (60–70 °C, 22.5 mL, 90%). The residue was purified by column chromatography on silica gel to give **3a** (1.16 g, 76%) as white solid.

##### 2<sup>nd</sup> reaction, using recovered HFIP solvent

To a solution of *N,N*-dimethylaniline **1a** (1.02 g, 8.4 mmol, 2.1 equiv.) and difluoroacetaldehyde ethyl hemiacetal **2a** (0.51 g, 4.0 mmol, 1.0 equiv.) and  $B(C_6F_5)_3$  (0.4 mmol, 0.20 g, 0.1 equiv.) in 20 mL of recovered HFIP. The resulting mixture was stirred at 65 °C in an oil bath. After completion of the reaction (monitored by TLC) the HFIP solvent was recovered by distillation directly from the reaction pot (60–70 °C, 18.0 mL, 90%). The residue was purified by column chromatography on silica gel to give **3a** (0.95 g, 78%) as white solid.

##### 3<sup>rd</sup> reaction, using 2-times recovered HFIP solvent

To a solution of *N,N*-dimethylaniline **1a** (0.76 g, 6.3 mmol, 2.1 equiv.) and difluoroacetaldehyde ethyl hemiacetal **2a** (0.38 g, 3.0 mmol, 1.0 equiv.) and  $B(C_6F_5)_3$  (0.3 mmol, 0.15 g, 0.1 equiv.) in 15 mL of recovered HFIP. The resulting mixture was stirred at 65 °C in an oil bath. After completion of the reaction (monitored by TLC) the HFIP solvent was recovered by distillation directly from the reaction pot (60–70 °C, 13.5 mL, 90%). The residue was purified by column chromatography on silica gel to give **3a** (0.72 g, 79%) as white solid.

##### 4<sup>th</sup> reaction, using 3-times recovered HFIP solvent

To a solution of *N,N*-dimethylaniline **1a** (0.51 g, 4.2 mmol, 2.1 equiv.) and difluoroacetaldehyde ethyl hemiacetal **2a** (0.26 g, 2.0 mmol, 1.0 equiv.) and  $B(C_6F_5)_3$  (0.2 mmol, 0.10 g, 0.1 equiv.) in 10 mL of recovered HFIP. The resulting mixture was stirred at 65 °C in an oil bath. After completion of the reaction (monitored by TLC) the HFIP solvent was recovered by distillation directly from the reaction pot (60–70 °C, 9.0 mL, 90%). The residue was purified by column chromatography on silica gel to give **3a** (0.49 g, 81%) as white solid.

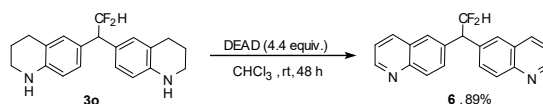

To a solution of **3o** (65.7 mg, 0.2 mmol) in  $CHCl_3$  (0.4 mL) was added DEAD (153.2 mg, 0.88 mmol, 4.4 equiv.). The reaction mixture was stirred at room temperature for 48 h. The solvent was removed by rotary evaporation. The crude product was purified by flash column chromatography using petroleum ether/ethyl acetate (5/1, v/v) to give 57.2 mg of **6** (89% yield).

## 5. Mechanistic investigation by NMR experiments

### 5.1. <sup>1</sup>H NMR study

<sup>1</sup>H NMR of individual species (HFIP, **1a** and **2a**), three binary mixtures (HFIP : B(C<sub>6</sub>F<sub>5</sub>)<sub>3</sub> and HFIP : **1a** and HFIP : **2a**), two ternary mixture (HFIP : B(C<sub>6</sub>F<sub>5</sub>)<sub>3</sub> : **1a** and HFIP : B(C<sub>6</sub>F<sub>5</sub>)<sub>3</sub> : **2a**) and one quaternary mixture (HFIP : B(C<sub>6</sub>F<sub>5</sub>)<sub>3</sub> : **1a** : **2a**) were recorded at a 0.06 mmol scale of aniline **1a**, 0.06 mmol scale of difluoroacetaldehyde ethyl hemiacetal **2a**, 0.012 mmol (20 mol%) scale of B(C<sub>6</sub>F<sub>5</sub>)<sub>3</sub>, 0.06 mmol scale of HFIP and 0.6 mL CDCl<sub>3</sub>.

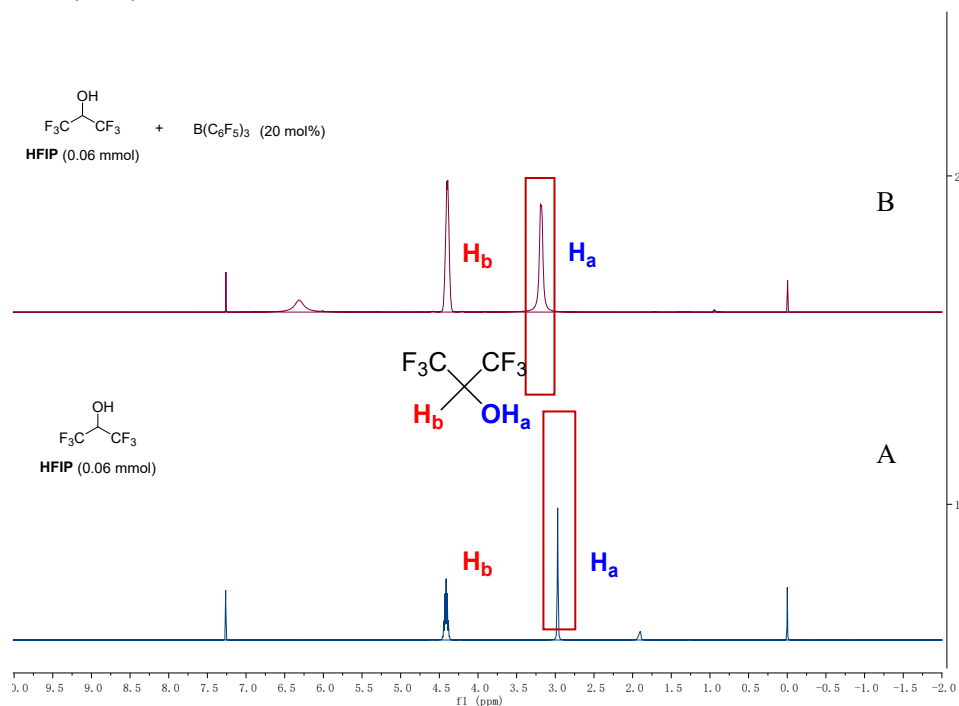

Figure S1 <sup>1</sup>H NMR of the individual specie (A) and the two binary mixture (B).

| Signal                 | Species             |                                                                         |
|------------------------|---------------------|-------------------------------------------------------------------------|
|                        | HFIP                | Binary mixture (HFIP : B(C <sub>6</sub> F <sub>5</sub> ) <sub>3</sub> ) |
| OH <sub>a</sub> (HFIP) | 2.99, d, J = 8.1 Hz | 3.18, d, J = 5.1 Hz (+0.19)                                             |

Table S1. Significant changes for the binary mixture with respect to individual specie.

The most significant changes found in <sup>1</sup>H NMR for the HFIP : B(C<sub>6</sub>F<sub>5</sub>)<sub>3</sub> binary mixture (Figure S1B) compared to the individual specie (Figure S1A) are the downfield shift (deshielded) of the OH (HFIP), from a frequency of 2.99 ppm to 3.18 ppm ( $\Delta\delta = 0.19$ ). These data suggest a strong interaction between B(C<sub>6</sub>F<sub>5</sub>)<sub>3</sub> and HFIP in solution presumably through coordination of the hydroxyl oxygen atom of HFIP to the boron atom in B(C<sub>6</sub>F<sub>5</sub>)<sub>3</sub> (Table S1). The broad peak (6.0–6.5 ppm) should be the OH signal of [(C<sub>6</sub>F<sub>5</sub>)<sub>3</sub>B(OH<sub>2</sub>)] adduct, which was formed with the residual water in deuterium reagent according to the reference (*Organometallics*, 2001, **20**, 4927–4938).

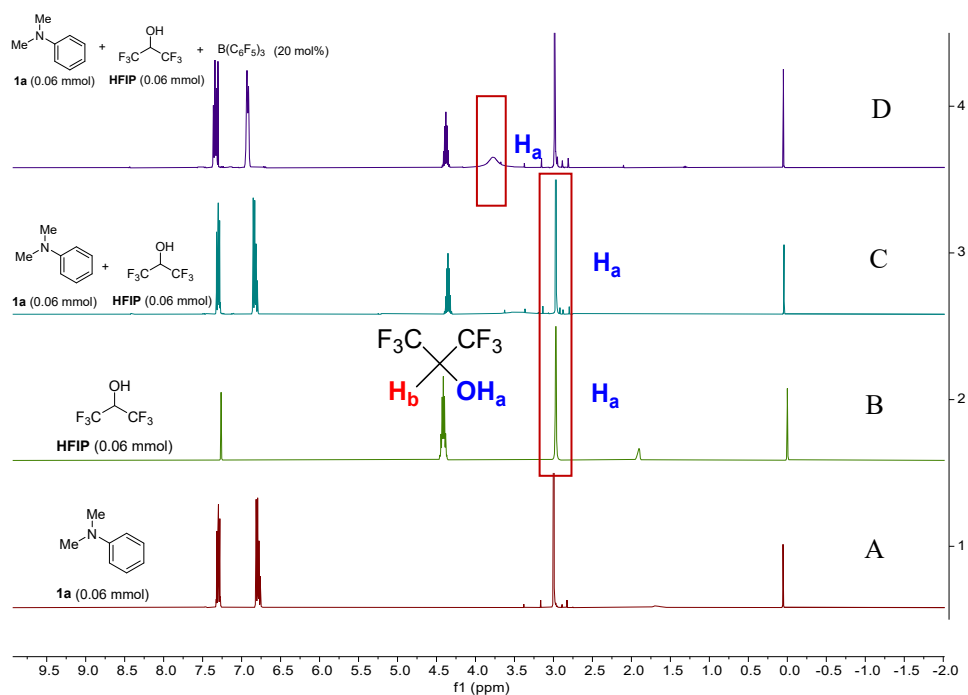

Figure S2  $^1\text{H}$  NMR of the individual species (A–B), the two binary mixture (C) and the ternary mixture (D).

| Signal                       | Species               |                               |                                                                         |
|------------------------------|-----------------------|-------------------------------|-------------------------------------------------------------------------|
|                              | HFIP                  | Binary mixture<br>(1a : HFIP) | Ternary mixture<br>(1a : HFIP :<br>$\text{B}(\text{C}_6\text{F}_5)_3$ ) |
| <b>OH<sub>a</sub> (HFIP)</b> | 2.99, d, $J = 8.1$ Hz | No significant change         | 3.74, br s<br>(+0.75)                                                   |

Table S2. Significant changes for the ternary mixture with respect to individual species and the binary mixture.

The most significant changes found in  $^1\text{H}$  NMR for the **1a** : HFIP :  $\text{B}(\text{C}_6\text{F}_5)_3$  ternary mixture (Figure S2D) compared to the individual specie (Figure S2B) and **1a** : HFIP binary mixture (Figure S2C) are the downfield shift (deshielded) of the OH (HFIP), from a frequency of 2.99 ppm to 3.74 ppm ( $\Delta\delta = 0.75$ ), supporting a stronger interaction between HFIP– $\text{B}(\text{C}_6\text{F}_5)_3$  adduct and **1a** in solution vs Figure S1 (Table S2).

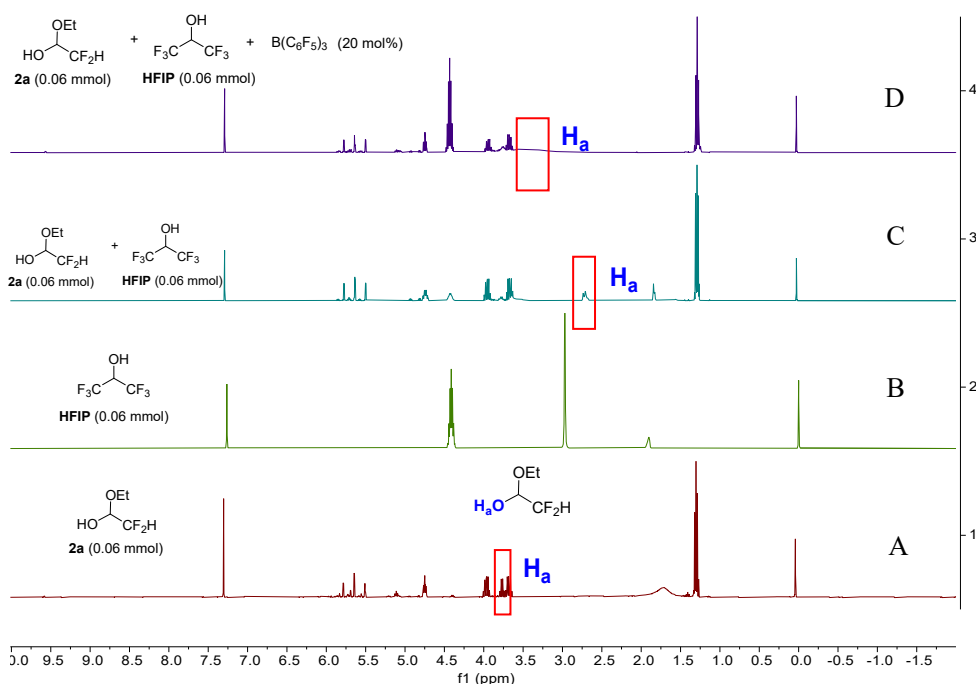

Figure S3  $^1\text{H}$  NMR of the individual species (A–B), the two binary mixture (C) and the ternary mixture (D).

| Signal   | Species               |                                                                |                                                                         |
|----------|-----------------------|----------------------------------------------------------------|-------------------------------------------------------------------------|
|          | HFIP                  | Binary mixture<br>(HFIP : $\text{B}(\text{C}_6\text{F}_5)_3$ ) | Ternary mixture<br>(2a : HFIP :<br>$\text{B}(\text{C}_6\text{F}_5)_3$ ) |
| OHa (2a) | 3.77, q, $J = 7.0$ Hz | 2.72, d, $J = 10.4$ Hz<br>(-1.05)                              | 3.41, br s<br>(-0.36)                                                   |

Table S3. Significant changes for the ternary mixture with respect to individual species and the binary mixture.

The most significant changes found in  $^1\text{H}$  NMR for the  $2\text{a} : \text{HFIP} : \text{B}(\text{C}_6\text{F}_5)_3$  ternary mixture (Figure S3D) and  $2\text{a} : \text{HFIP}$  binary mixture (Figure S3C) compared to the individual specie (Figure S3A) are the upfield shift of the OH ( $2\text{a}$ ), from a frequency of 3.77 ppm to 2.72 ppm ( $\Delta\delta = 1.05$ ) and 3.74 ppm ( $\Delta\delta = 0.36$ ), respectively. These data support strong interactions between HFIP and  $2\text{a}$  as well as HFIP– $\text{B}(\text{C}_6\text{F}_5)_3$  adduct and  $2\text{a}$  (Table S3).

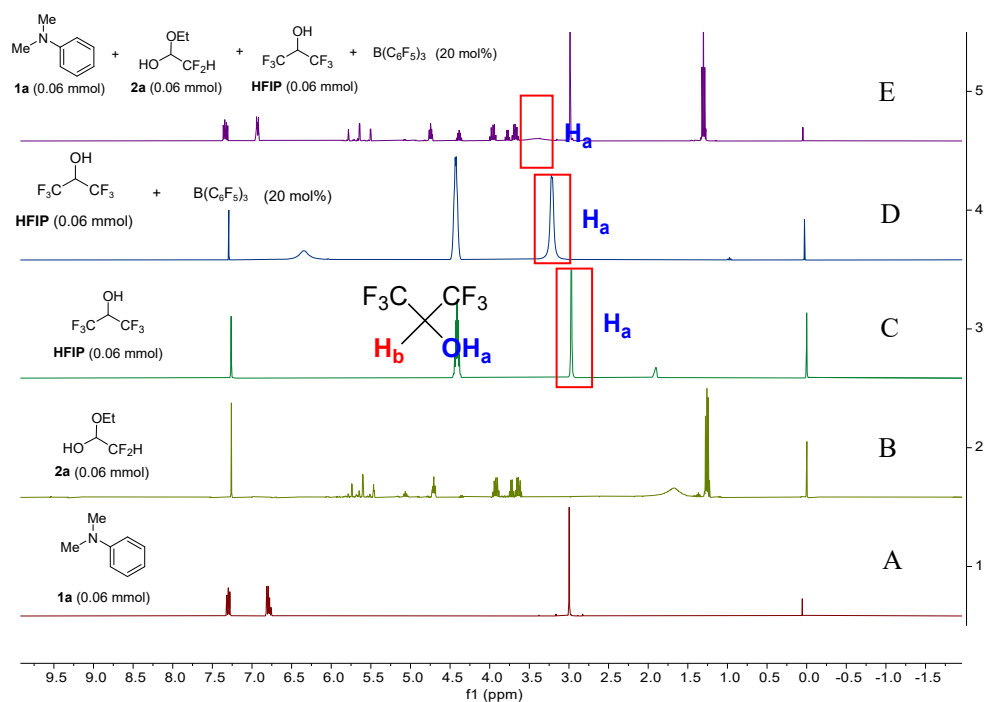

Figure S4 <sup>1</sup>H NMR of the individual species (A–C), the two binary mixture (D) and the quaternary mixture (E).

| Signal                       | Species                    |                                       |                                                                                                |
|------------------------------|----------------------------|---------------------------------------|------------------------------------------------------------------------------------------------|
|                              | HFIP                       | Binary mixture<br>(1a : HFIP)         | Quaternary<br>mixture<br>(1a : 2a : HFIP :<br>B(C <sub>6</sub> F <sub>5</sub> ) <sub>3</sub> ) |
| <b>OH<sub>a</sub> (HFIP)</b> | 2.99, d, <i>J</i> = 8.1 Hz | 3.18, d, <i>J</i> = 5.1 Hz<br>(+0.19) | 3.49, br s<br>(+0.50)<br>for binary mixture<br>(+0.31)                                         |

Table S4. Significant changes for the quaternary mixture with respect to individual species and the two binary mixture.

The most significant changes found in <sup>1</sup>H NMR for the 1a : 2a : HFIP : B(C<sub>6</sub>F<sub>5</sub>)<sub>3</sub> quaternary mixture (Figure S4E) compared to the individual specie (Figure S4C) and HFIP : B(C<sub>6</sub>F<sub>5</sub>)<sub>3</sub> binary mixture (Figure S4D) are the downfield shift (deshielded) of the OH (HFIP), from a frequency of 2.99 ppm to 3.49 ppm ( $\Delta\delta = 0.50$ ) and 3.18 ppm to 3.49 ppm ( $\Delta\delta = 0.31$ ), further supporting strong interactions between HFIP–B(C<sub>6</sub>F<sub>5</sub>)<sub>3</sub> adduct and the two reactants (Table S4).

## 5.2. <sup>19</sup>F NMR study

<sup>19</sup>F NMR of individual species (HFIP, B(C<sub>6</sub>F<sub>5</sub>)<sub>3</sub>) and binary mixture (HFIP : B(C<sub>6</sub>F<sub>5</sub>)<sub>3</sub>) were recorded at a 0.06 mmol scale of HFIP, 0.012 mmol (20 mol%) scale of B(C<sub>6</sub>F<sub>5</sub>)<sub>3</sub> and 0.6 mL CDCl<sub>3</sub>.

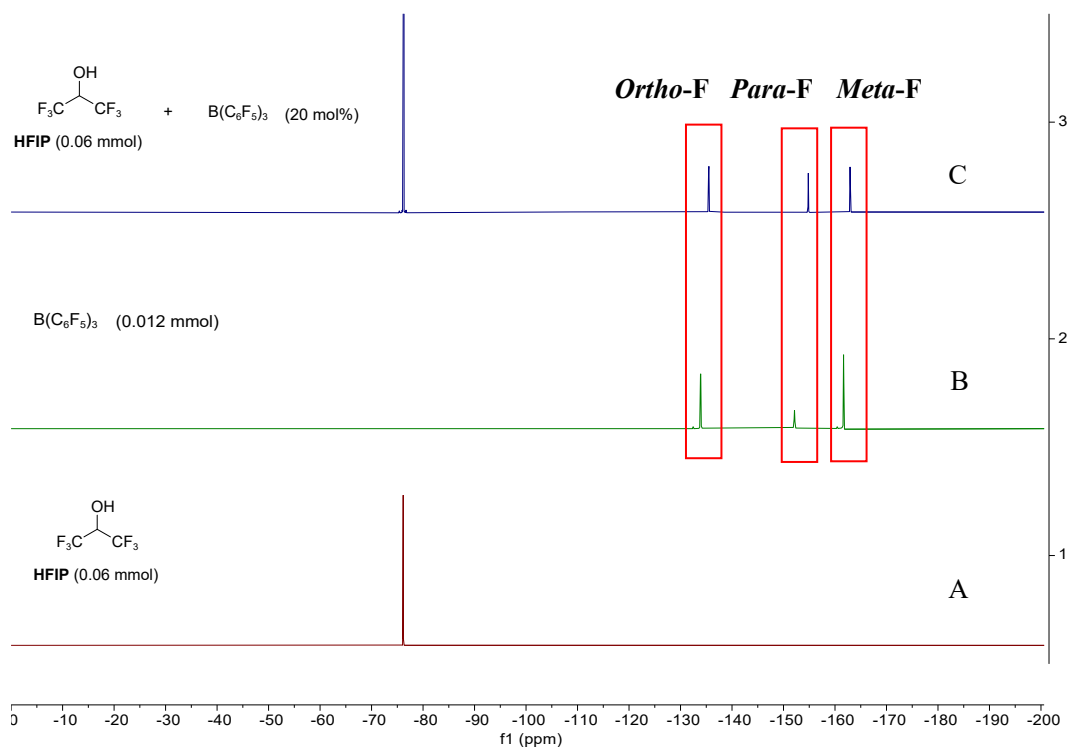

Figure S5 <sup>19</sup>F NMR of the individual species (A, B) and the two binary mixture (C).

| Signal                                                               | Species                      |                                                |                                                                         |
|----------------------------------------------------------------------|------------------------------|------------------------------------------------|-------------------------------------------------------------------------|
|                                                                      | HFIP                         | B(C <sub>6</sub> F <sub>5</sub> ) <sub>3</sub> | Binary mixture (HFIP : B(C <sub>6</sub> F <sub>5</sub> ) <sub>3</sub> ) |
| <b>CF<sub>3</sub> of (HFIP)</b>                                      | -76.15, d, <i>J</i> = 5.9 Hz | –                                              | -76.19, d, <i>J</i> = 5.8 Hz                                            |
| <b><i>Ortho-F</i> of (B(C<sub>6</sub>F<sub>5</sub>)<sub>3</sub>)</b> | –                            | -133.90, d, <i>J</i> = 18.5 Hz                 | -135.49, dd, <i>J</i> = 22.8, 7.3 Hz (-1.75)                            |
| <b><i>Meta-F</i> of (B(C<sub>6</sub>F<sub>5</sub>)<sub>3</sub>)</b>  | –                            | -161.67, td, <i>J</i> = 23.0, 8.6 Hz           | -162.93 (td, <i>J</i> = 23.0, 8.6 Hz) (-1.26)                           |
| <b><i>Para-F</i> of (B(C<sub>6</sub>F<sub>5</sub>)<sub>3</sub>)</b>  | –                            | -152.14, s                                     | -154.82, t, <i>J</i> = 20.0 Hz (-2.68)                                  |

Table S5. Significant changes for the binary mixture with respect to individual species.

The most significant changes found in <sup>19</sup>F NMR for the binary mixture (Figure S5C) compared to the individual species (Figure S5A–B) are the upfield shift of the *ortho-F*, *meta-F* and *para-F* of B(C<sub>6</sub>F<sub>5</sub>)<sub>3</sub> about 1.75 ppm, 1.26 ppm and 2.68 ppm, respectively (Table S5). These results also suggest a strong interaction between B(C<sub>6</sub>F<sub>5</sub>)<sub>3</sub> and HFIP in solution presumably through coordination of the hydroxyl oxygen atom of HFIP to the boron atom in B(C<sub>6</sub>F<sub>5</sub>)<sub>3</sub> as the observations in FigureS1.



### 5.3. $^1\text{H}$ NMR titration studies with **4** and HFIP with gradual addition of $\text{B}(\text{C}_6\text{F}_5)_3$

To evaluate the interaction between the catalyst and substrate in the reaction profile, the mixture of **4** and HFIP was titrated with  $\text{B}(\text{C}_6\text{F}_5)_3$  (0 mol%, 20.0 mol%, 50.0 mol%, and 100.0 mol%) and the process was monitored by  $^1\text{H}$  NMR (Figure S6). A gradual downfield shift of the  $-\text{OH}$  proton of HFIP was noticed with the sequential addition of  $\text{B}(\text{C}_6\text{F}_5)_3$ . The initial broad  $-\text{OH}$  peak at 2.99 ppm for pure HFIP in  $\text{CDCl}_3$  solvent shifted to around 3.41 ppm with the addition of 20.0 mol% of  $\text{B}(\text{C}_6\text{F}_5)_3$ . Furthermore, with the sequential addition of more  $\text{B}(\text{C}_6\text{F}_5)_3$  the  $-\text{OH}$  peak shifted further downfield to 4.07 ppm (with 1.0 equiv. of  $\text{B}(\text{C}_6\text{F}_5)_3$ ). The signal for the  $\text{C}-\text{H}$  proton of HFIP was almost unchanged even with the addition of 1.0 equiv. of  $\text{B}(\text{C}_6\text{F}_5)_3$ . This further indicates that the  $-\text{OH}$  protons of HFIP interact with the  $\text{B}(\text{C}_6\text{F}_5)_3$ . Furthermore, the gradual downfield shift of the aromatic H of **4** was noticed with the sequential addition of  $\text{B}(\text{C}_6\text{F}_5)_3$ , which also supporting potential interactions between **4** and HFIP- $\text{B}(\text{C}_6\text{F}_5)_3$  adduct.

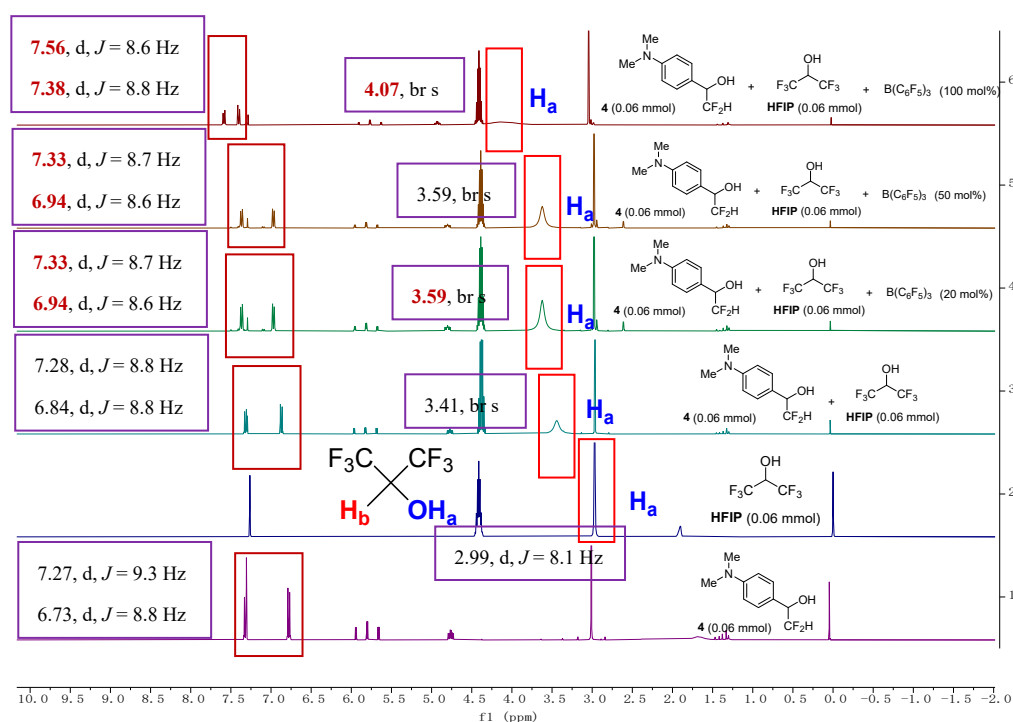

Figure S6  $^1\text{H}$  NMR titration studies with **4** and HFIP with gradual addition of  $\text{B}(\text{C}_6\text{F}_5)_3$

In 4th NMR tube having stock solution of **4** and HFIP (0.06 mmol each) 20 mol%  $\text{B}(\text{C}_6\text{F}_5)_3$  (6.1 mg), 0.6 mL of  $\text{CDCl}_3$  was added and NMR 4 was recorded immediately.

In 5th NMR tube having stock solution of **4** and HFIP (0.06 mmol each) 50 mol%  $\text{B}(\text{C}_6\text{F}_5)_3$  (15.3 mg), 0.6 mL of  $\text{CDCl}_3$  was added and NMR 5 was recorded immediately.

In 6th NMR tube having stock solution of **4** and HFIP (0.06 mmol each) 100 mol%  $\text{B}(\text{C}_6\text{F}_5)_3$  (30.7 mg), 0.6 mL of  $\text{CDCl}_3$  was added and NMR 6 was recorded immediately.

2.99, d,  $J = 8.1$  Hz

### 5.4. The HFIP- $\text{B}(\text{C}_6\text{F}_5)_3$ adduct capture experiment

$\text{B}(\text{C}_6\text{F}_5)_3$  (0.1 mmol) was dissolved in HFIP (1.0 mL). The solution was determined by the HRMS. The peak of  $[\text{B}(\text{C}_6\text{F}_5)_3][\text{HFIP}]$  was detected [HRMS (ESI) Calcd for  $[\text{C}_{21}\text{HBF}_{21}\text{O}]$ : 678.9790, Found: 678.9794].

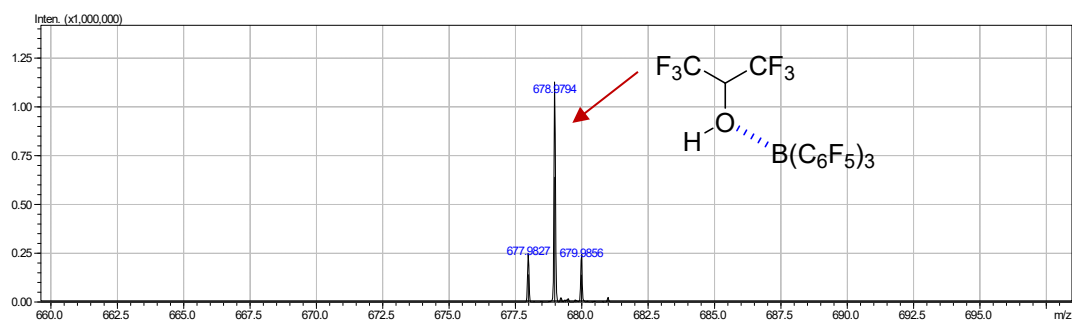

Figure S7

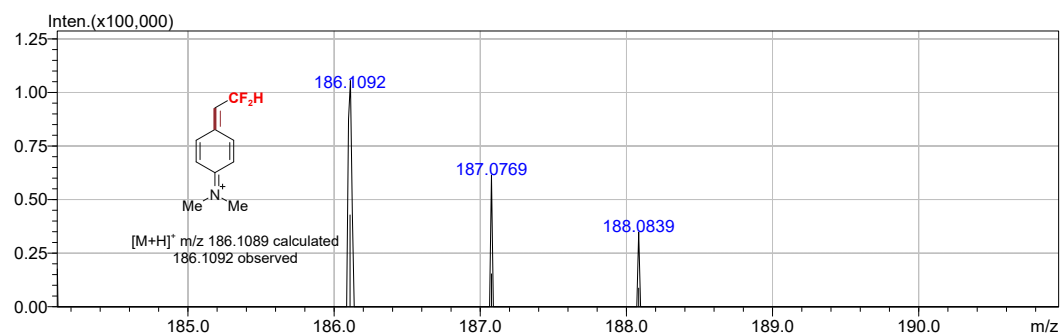

Figure S8

## 6. Unsuccessful substrates

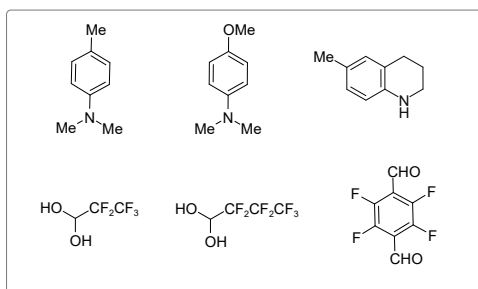

## 7. Control experiments

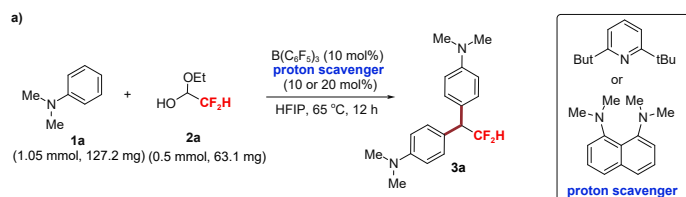

For the addition of 10 mol% 2,6-di-tert-butylpyridine, 35% yield of **3a** (53.4 mg) along with 19% yield of **4** (19.2 mg) were obtained and 9% of **1a** (11.5 mg) recovered.  
 For the addition of 20 mol% 2,6-di-tert-butylpyridine, 31% yield of **3a** (47.3 mg) along with 24% yield of **4** (24.3 mg) were obtained and 13% of **1a** (16.5 mg) recovered.  
 For the addition of 10 mol% *N,N,N',N'*-tetramethyl-1,8-naphthalenediamine, 39% yield of **3a** (59.5 mg) along with 14% yield of **4** (14.1 mg) were obtained and 11% of **1a** (13.9 mg) recovered.  
 For the addition of 20 mol% *N,N,N',N'*-tetramethyl-1,8-naphthalenediamine, 32% yield of **3a** (48.8 mg) along with 17% yield of **4** (17.2 mg) were obtained and 15% of **1a** (19.1 mg) recovered.

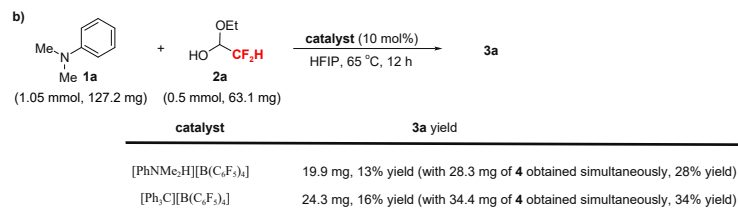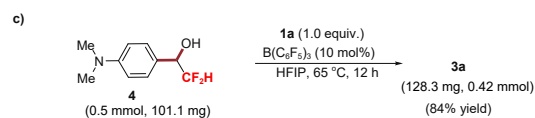

a) To a 25 mL Schlenk tube was added aniline **1a** (1.05 mmol, 127.2 mg, 2.1 equiv.), **2a** (0.5 mmol, 63.1 mg, 1.0 equiv.), B(C<sub>6</sub>F<sub>5</sub>)<sub>3</sub> (0.05 mmol, 25.6 mg, 0.1 equiv.) and 2,6-di-tert-butylpyridine or *N,N,N',N'*-tetramethyl-1,8-naphthalenediamine (10 or 20 mol %) as a proton scavenger, then 2.5 mL HFIP was added. The resulting mixture was stirred at 65 °C in an oil bath for 12 hours according to the optimized reaction conditions. Then the mixture was concentrated under reduced pressure. The residue was purified by column chromatography to afford the corresponding products as shown in the figure above.

b) To a 25 mL Schlenk tube was added aniline **1a** (1.05 mmol, 127.2 mg, 2.1 equiv.), **2a** (0.5 mmol, 63.1 mg, 1.0 equiv.), [PhNMe<sub>2</sub>H][B(C<sub>6</sub>F<sub>5</sub>)<sub>4</sub>] (0.05 mmol, 40.1 mg, 0.1 equiv.) or [Ph<sub>3</sub>C][B(C<sub>6</sub>F<sub>5</sub>)<sub>4</sub>] (0.05 mmol, 46.1 mg, 0.1 equiv.), then 2.5 mL HFIP was added. The resulting mixture was stirred at 65 °C in an oil bath for 12 hours according to the optimized reaction conditions. Then the mixture was concentrated under reduced pressure. The residue was purified by column chromatography to afford the corresponding products as shown in the figure above.

c) To a 25 mL Schlenk tube was added **4** (0.5 mmol, 101.1 mg), aniline **1a** (0.5 mmol, 60.5 mg, 1.0 equiv.), B(C<sub>6</sub>F<sub>5</sub>)<sub>3</sub> (0.05 mmol, 25.6 mg, 0.1 equiv.), then 2.5 mL HFIP was added. The resulting mixture was stirred at 65 °C in an oil bath for 12 hours according to the optimized reaction conditions. Then the mixture was concentrated under reduced pressure. The residue was purified by column chromatography to afford the desired product **3a** (white solid, 128.3 mg, 0.42 mmol, 84% yield).

## 8. Characterization data of the products

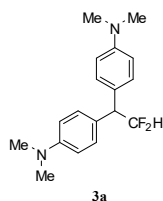

**4,4'-(2,2-difluoroethane-1,1-diyl)bis(*N,N*-dimethylaniline) (**3a**):** The crude products were purified by column chromatography with petroleum ether/ethyl acetate (30/1 to 15/1, v/v) as eluent to give compound **3a** (white solid, 124.8 mg, 0.41 mmol, 81% yield). M.p.: 72–74 °C; <sup>1</sup>H NMR (400 MHz, CDCl<sub>3</sub>) δ 7.17 (d, *J* = 8.7 Hz, 4H), 6.69 (d, *J* = 8.8 Hz, 4H), 6.22 (td, *J* = 56.4, 4.5 Hz, 1H), 4.23 (td, *J* = 16.2, 4.4 Hz, 1H), 2.93 (s, 12H); <sup>19</sup>F NMR (376 MHz, CDCl<sub>3</sub>) δ -117.92 (dd, *J* = 56.5, 16.9 Hz, 2F); <sup>13</sup>C NMR (100 MHz, CDCl<sub>3</sub>) δ 149.6, 129.6, 125.5 (t, <sup>3</sup>*J*<sub>C-F</sub> = 3.6 Hz), 117.5 (t, <sup>1</sup>*J*<sub>C-F</sub> = 243.9 Hz), 112.6, 53.2 (t, <sup>2</sup>*J*<sub>C-F</sub> = 20.4 Hz), 40.6; HRMS (ESI) *m/z*: [M+H]<sup>+</sup> Calcd for C<sub>18</sub>H<sub>23</sub>F<sub>2</sub>N<sub>2</sub>: 305.1824, Found: 305.1823.

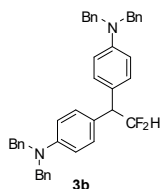

**4,4'-(2,2-difluoroethane-1,1-diyl)bis(*N,N*-dibenzylaniline) (**3b**):** The crude products were purified by column chromatography with petroleum ether/ethyl acetate (30/1 to 15/1, v/v) as eluent to give compound **3b** (white solid, 222.1 mg, 0.37 mmol, 73% yield). M.p.: 112–113 °C; <sup>1</sup>H NMR (400 MHz, CDCl<sub>3</sub>) δ 7.32 (t, *J* = 7.3 Hz, 8H), 7.24 (t, *J* = 8.6 Hz, 12H), 7.07 (d, *J* = 8.6 Hz, 4H), 6.66 (d, *J* = 8.6 Hz, 4H), 6.15 (td, *J* = 56.4, 4.3 Hz, 1H), 4.62 (s, 8H), 4.13 (td, *J* = 16.3,

4.2 Hz, 1H);  $^{19}\text{F}$  NMR (376 MHz,  $\text{CDCl}_3$ )  $\delta$  -117.77 (dd,  $J = 56.5, 16.5$  Hz, 2F);  $^{13}\text{C}$  NMR (100 MHz,  $\text{CDCl}_3$ )  $\delta$  148.2, 138.5, 129.7, 128.6, 126.9, 126.6, 125.5 (t,  $^1J_{\text{C-F}} = 3.5$  Hz), 117.5 (t,  $^1J_{\text{C-F}} = 244.2$  Hz), 112.23, 54.2, 53.3 (t,  $^2J_{\text{C-F}} = 20.4$  Hz); HRMS (ESI)  $m/z$ :  $[\text{M}+\text{H}]^+$  Calcd for  $\text{C}_{42}\text{H}_{39}\text{F}_2\text{N}_2$ : 609.3076, Found: 609.3080.

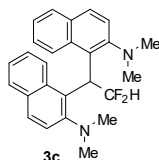

**1,1'-(2,2-difluoroethane-1,1-diyl)bis(*N,N*-dimethylnaphthalen-2-amine) (3c):** The crude products were purified by column chromatography with petroleum ether/ethyl acetate (20/1 to 15/1, v/v) as eluent to give compound **3c** (white solid, 139.6 mg, 0.35 mmol, 69% yield). M.p.: 50–52 °C;  $^1\text{H}$  NMR (400 MHz,  $\text{CDCl}_3$ )  $\delta$  8.32 – 8.28 (m, 2H), 8.08 – 8.03 (m, 2H), 7.50 – 7.41 (m, 6H), 7.01 (d,  $J = 7.9$  Hz, 2H), 6.56 (td,  $J = 55.7, 4.2$  Hz, 1H), 5.90 (td,  $J = 14.5, 4.1$  Hz, 1H), 2.87 (s, 12H);  $^{19}\text{F}$  NMR (376 MHz,  $\text{CDCl}_3$ )  $\delta$  -116.77 (dd,  $J = 56.2, 14.3$  Hz, 2F);  $^{13}\text{C}$  NMR (100 MHz,  $\text{CDCl}_3$ )  $\delta$  150.6, 133.0, 129.3, 127.8 (t,  $^3J_{\text{C-F}} = 3.2$  Hz), 126.5, 126.4, 125.0, 124.9, 123.6, 117.9 (t,  $^1J_{\text{C-F}} = 245.0$  Hz), 113.3, 45.2, 44.7 (t,  $^2J_{\text{C-F}} = 20.6$  Hz); HRMS (ESI)  $m/z$ :  $[\text{M}+\text{H}]^+$  Calcd for  $\text{C}_{26}\text{H}_{27}\text{F}_2\text{N}_2$ : 405.2137, Found: 405.2139.

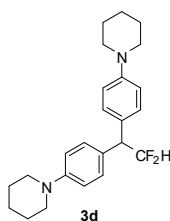

**1,1'-(2,2-difluoroethane-1,1-diyl)bis(4,1-phenylene)dipiperidine (3d):** The crude products were purified by column chromatography with petroleum ether/ethyl acetate (30/1 to 20/1, v/v) as eluent to give compound **3d** (white solid, 151.9 mg, 0.39 mmol, 79% yield). M.p.: 79–81 °C;  $^1\text{H}$  NMR (400 MHz,  $\text{CDCl}_3$ )  $\delta$  7.16 (t,  $J = 8.6$  Hz, 4H), 6.89 (d,  $J = 8.8$  Hz, 4H), 6.21 (td,  $J = 56.3, 5.1$  Hz, 1H), 4.38 – 4.06 (m, 1H), 3.13 (s, 8H), 1.69 (s, 8H), 1.56 (s, 4H);  $^{19}\text{F}$  NMR (376 MHz,  $\text{CDCl}_3$ )  $\delta$  -117.95 (ddd,  $J = 56.3, 15.8, 8.3$  Hz, 2F);  $^{13}\text{C}$  NMR (100 MHz,  $\text{CDCl}_3$ )  $\delta$  151.2, 129.5, 127.8 (t,  $^3J_{\text{C-F}} = 3.6$  Hz), 117.3 (t,  $^1J_{\text{C-F}} = 244.1$  Hz), 116.2, 53.3 (t,  $^2J_{\text{C-F}} = 20.5$  Hz), 50.3, 25.8, 24.2; HRMS (ESI)  $m/z$ :  $[\text{M}+\text{H}]^+$  Calcd for  $\text{C}_{24}\text{H}_{31}\text{F}_2\text{N}_2$ : 385.2450, Found: 385.2449.

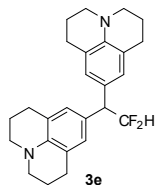

**9,9'-(2,2-difluoroethane-1,1-diyl)bis(2,3,6,7-tetrahydro-1*H*,5*H*-pyrido[3,2,1-*ij*]quinoline) (3e):** The crude products were purified by column chromatography with petroleum ether/ethyl acetate (30/1 to 20/1, v/v) as eluent to give compound **3e** (white solid, 175.7 mg, 0.43 mmol, 86% yield). M.p.: 90–92 °C;  $^1\text{H}$  NMR (400 MHz,  $\text{CDCl}_3$ )  $\delta$  6.72 (s, 4H), 6.17 (td,  $J = 56.6, 4.5$  Hz, 1H), 3.98 (td,  $J = 16.3, 4.4$  Hz, 1H), 3.19 – 3.03 (m, 8H), 2.74 (t,  $J = 6.5$  Hz, 8H), 1.96 (p,  $J = 6.0$  Hz, 8H);  $^{19}\text{F}$  NMR (376 MHz,  $\text{CDCl}_3$ )  $\delta$  -117.52 (dd,  $J = 56.5, 16.7$  Hz, 2F);  $^{13}\text{C}$  NMR (100 MHz,  $\text{CDCl}_3$ )  $\delta$  142.0, 127.3, 124.9 (t,  $^3J_{\text{C-F}} = 3.4$  Hz), 121.4, 117.7 (t,  $^1J_{\text{C-F}} = 243.7$  Hz), 53.6 (t,  $^2J_{\text{C-F}} = 20.3$

Hz), 49.9, 27.6, 22.0; **HRMS** (ESI)  $m/z$ :  $[M+H]^+$  Calcd for  $C_{26}H_{31}F_2N_2$ : 409.2450, Found: 409.2456.

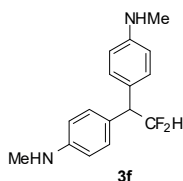

**4,4'-(2,2-difluoroethane-1,1-diyl)bis(*N*-methylaniline) (3f):** The crude products were purified by column chromatography with petroleum ether/ethyl acetate (20/1 to 15/1, v/v) as eluent to give compound **3f** (pale yellow oil, 114.7 mg, 0.41 mmol, 83% yield). **<sup>1</sup>H NMR** (400 MHz,  $CDCl_3$ )  $\delta$  7.13 (d,  $J = 8.5$  Hz, 4H), 6.58 (d,  $J = 8.6$  Hz, 4H), 6.21 (td,  $J = 56.4, 4.4$  Hz, 1H), 4.21 (td,  $J = 16.2, 4.3$  Hz, 1H), 3.46 (s, 2H), 2.82 (s, 6H); **<sup>19</sup>F NMR** (376 MHz,  $CDCl_3$ )  $\delta$  -117.93 (dd,  $J = 56.2, 16.0$  Hz, 2F); **<sup>13</sup>C NMR** (100 MHz,  $CDCl_3$ )  $\delta$  148.3, 129.7, 126.3 (t,  $^3J_{C-F} = 3.7$  Hz), 117.5 (t,  $^1J_{C-F} = 243.9$  Hz), 112.4, 53.4 (t,  $^2J_{C-F} = 20.4$  Hz), 30.7; **HRMS** (ESI)  $m/z$ :  $[M+H]^+$  Calcd for  $C_{16}H_{19}F_2N_2$ : 277.1511, Found: 277.1510.

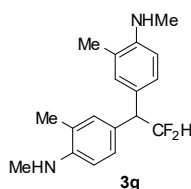

**4,4'-(2,2-difluoroethane-1,1-diyl)bis(*N*,2-dimethylaniline) (3g):** The crude products were purified by column chromatography with petroleum ether/ethyl acetate (20/1 to 15/1, v/v) as eluent to give compound **3g** (yellow solid, 132.4 mg, 0.44 mmol, 87% yield). M.p.: 70–72 °C; **<sup>1</sup>H NMR** (400 MHz,  $CDCl_3$ )  $\delta$  7.13 (dd,  $J = 8.2, 2.0$  Hz, 2H), 7.01 (d,  $J = 1.4$  Hz, 2H), 6.60 (d,  $J = 8.3$  Hz, 2H), 6.25 (td,  $J = 56.4, 4.6$  Hz, 1H), 4.20 (td,  $J = 16.2, 4.5$  Hz, 1H), 3.57 (s, 2H), 2.90 (s, 6H), 2.13 (s, 6H); **<sup>19</sup>F NMR** (376 MHz,  $CDCl_3$ )  $\delta$  -117.74 (dd,  $J = 56.4, 15.7$  Hz, 2F); **<sup>13</sup>C NMR** (100 MHz,  $CDCl_3$ )  $\delta$  146.2, 130.6, 127.4, 126.0 (t,  $^3J_{C-F} = 3.7$  Hz), 122.0, 117.6 (t,  $^1J_{C-F} = 243.8$  Hz), 109.1, 53.5 (t,  $^2J_{C-F} = 20.4$  Hz), 30.7, 17.4; **HRMS** (ESI)  $m/z$ :  $[M+H]^+$  Calcd for  $C_{18}H_{23}F_2N_2$ : 305.1824, Found: 305.1821.

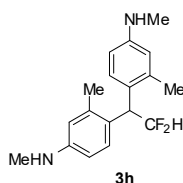

**4,4'-(2,2-difluoroethane-1,1-diyl)bis(*N*,3-dimethylaniline) (3h):** The crude products were purified by column chromatography with petroleum ether/ethyl acetate (20/1 to 15/1, v/v) as eluent to give compound **3h** (yellow solid, 112.6 mg, 0.37 mmol, 74% yield). M.p.: 89–91 °C; **<sup>1</sup>H NMR** (400 MHz,  $CDCl_3$ )  $\delta$  7.08 (d,  $J = 8.9$  Hz, 2H), 6.44 (d,  $J = 5.8$  Hz, 4H), 6.21 (dd,  $J = 56.2, 4.6$  Hz, 1H), 4.56 (td,  $J = 14.9, 4.5$  Hz, 1H), 3.44 (s, 2H), 2.81 (s, 6H), 2.26 (s, 6H); **<sup>19</sup>F NMR** (376 MHz,  $CDCl_3$ )  $\delta$  -117.97 (dd,  $J = 56.3, 14.5$  Hz, 2F); **<sup>13</sup>C NMR** (100 MHz,  $CDCl_3$ )  $\delta$  148.0, 137.8, 128.9, 124.9 (t,  $^3J_{C-F} = 3.5$  Hz), 118.3 (t,  $^1J_{C-F} = 243.4$  Hz), 114.7, 109.8, 45.4 (t,  $^2J_{C-F} = 20.5$  Hz), 30.7, 20.0; **HRMS** (ESI)  $m/z$ :  $[M+H]^+$  Calcd for  $C_{18}H_{23}F_2N_2$ : 305.1824, Found: 305.1822.

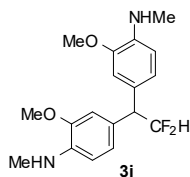

**4,4'-(2,2-difluoroethane-1,1-diyl)bis(2-methoxy-N-methylaniline) (3i):** The crude products were purified by column chromatography with petroleum ether/ethyl acetate (15/1 to 10/1, v/v) as eluent to give compound **3i** (white solid, 159.8 mg, 0.48 mmol, 95% yield). M.p.: 94–96 °C; **<sup>1</sup>H NMR** (400 MHz, CDCl<sub>3</sub>) δ 6.86 (dd, *J* = 8.0, 1.6 Hz, 2H), 6.70 (d, *J* = 1.5 Hz, 2H), 6.56 (d, *J* = 8.1 Hz, 2H), 6.24 (td, *J* = 56.4, 4.3 Hz, 1H), 4.23 (td, *J* = 16.2, 4.3 Hz, 1H), 4.22 (s, 2H), 3.81 (s, 6H), 2.86 (s, 6H); **<sup>19</sup>F NMR** (376 MHz, CDCl<sub>3</sub>) δ -117.55 (dd, *J* = 56.5, 16.6 Hz, 2F); **<sup>13</sup>C NMR** (100 MHz, CDCl<sub>3</sub>) δ 146.8, 138.4, 125.5 (t, <sup>3</sup>*J*<sub>C-F</sub> = 3.5 Hz), 121.5, 117.5 (t, <sup>1</sup>*J*<sub>C-F</sub> = 244.1 Hz), 110.3, 109.0, 55.4, 54.0 (t, <sup>2</sup>*J*<sub>C-F</sub> = 20.3 Hz), 30.3; **HRMS** (ESI) *m/z*: [M+H]<sup>+</sup> Calcd for C<sub>18</sub>H<sub>23</sub>F<sub>2</sub>N<sub>2</sub>O<sub>2</sub>: 337.1723, Found: 337.1719.

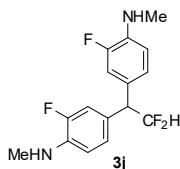

**4,4'-(2,2-difluoroethane-1,1-diyl)bis(2-fluoro-N-methylaniline) (3j):** The crude products were purified by column chromatography with petroleum ether/ethyl acetate (30/1 to 15/1, v/v) as eluent to give compound **3j** (yellow solid, 99.7 mg, 0.32 mmol, 64% yield). M.p.: 44–46 °C; **<sup>1</sup>H NMR** (400 MHz, CDCl<sub>3</sub>) δ 7.14 (t, *J* = 8.5 Hz, 2H), 6.51–6.10 (m, 5H), 4.81 (td, *J* = 15.5, 4.8 Hz, 1H), 3.80 (s, 2H), 2.79 (s, 6H); **<sup>19</sup>F NMR** (376 MHz, CDCl<sub>3</sub>) δ -116.33 (d, *J* = 9.1 Hz, 2F), -118.40 (dd, *J* = 56.4, 15.8 Hz, 2F); **<sup>13</sup>C NMR** (100 MHz, CDCl<sub>3</sub>) δ 161.8 (d, <sup>1</sup>*J*<sub>C-F</sub> = 244.1 Hz), 150.2 (d, <sup>3</sup>*J*<sub>C-F</sub> = 11.5 Hz), 130.3 (d, <sup>3</sup>*J*<sub>C-F</sub> = 6.2 Hz), 116.5 (t, <sup>1</sup>*J*<sub>C-F</sub> = 243.9 Hz), 111.9 (dt, <sup>3</sup>*J*<sub>C-F</sub> = 15.3, 3.6 Hz), 108.5, 99.0 (d, <sup>2</sup>*J*<sub>C-F</sub> = 26.9 Hz), 40.4 (t, <sup>2</sup>*J*<sub>C-F</sub> = 22.4 Hz), 30.5; **HRMS** (ESI) *m/z*: [M+H]<sup>+</sup> Calcd for C<sub>16</sub>H<sub>17</sub>F<sub>4</sub>N<sub>2</sub>: 313.1323, Found: 313.1320.

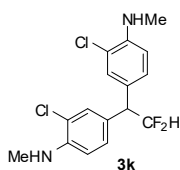

**4,4'-(2,2-difluoroethane-1,1-diyl)bis(2-chloro-N-methylaniline) (3k):** The crude products were purified by column chromatography with petroleum ether/ethyl acetate (30/1 to 15/1, v/v) as eluent to give compound **3k** (yellow solid, 120.8 mg, 0.35 mmol, 70% yield). M.p.: 59–61 °C; **<sup>1</sup>H NMR** (400 MHz, CDCl<sub>3</sub>) δ 7.17 (d, *J* = 2.0 Hz, 2H), 7.09 (dd, *J* = 8.4, 2.0 Hz, 2H), 6.61 (d, *J* = 8.4 Hz, 2H), 6.17 (td, *J* = 56.1, 4.1 Hz, 1H), 4.35 (s, 2H), 4.15 (td, *J* = 16.2, 4.0 Hz, 1H), 2.89 (s, 6H); **<sup>19</sup>F NMR** (376 MHz, CDCl<sub>3</sub>) δ -118.15 (dd, *J* = 55.9, 14.9 Hz, 2F); **<sup>13</sup>C NMR** (100 MHz, CDCl<sub>3</sub>) δ 144.2, 129.4, 128.4, 125.7 (t, <sup>3</sup>*J*<sub>C-F</sub> = 3.5 Hz), 119.1, 116.8 (t, <sup>1</sup>*J*<sub>C-F</sub> = 244.6 Hz), 110.6, 52.8 (t, <sup>2</sup>*J*<sub>C-F</sub> = 20.8 Hz), 30.4; **HRMS** (ESI) *m/z*: [M+H]<sup>+</sup> Calcd for C<sub>16</sub>H<sub>17</sub>F<sub>2</sub>Cl<sub>2</sub>N<sub>2</sub>: 345.0732, Found: 345.0731.

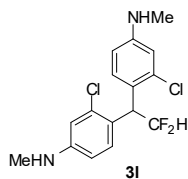

**4,4'-(2,2-difluoroethane-1,1-diyl)bis(3-chloro-*N*-methylaniline) (3l):** The crude products were purified by column chromatography with petroleum ether/ethyl acetate (30/1 to 15/1, v/v) as eluent to give compound **3l** (white solid, 129.4 mg, 0.38 mmol, 75% yield). M.p.: 77–79 °C; **<sup>1</sup>H NMR** (400 MHz, CDCl<sub>3</sub>) δ 7.19 (d, *J* = 8.5 Hz, 2H), 6.63 (s, 2H), 6.47 (d, *J* = 8.6 Hz, 2H), 6.24 (td, *J* = 55.7, 3.3 Hz, 1H), 5.25 (td, *J* = 16.7, 3.1 Hz, 1H), 3.74 (s, 2H), 2.78 (s, 6H); **<sup>19</sup>F NMR** (376 MHz, CDCl<sub>3</sub>) δ -119.08 (dd, *J* = 54.9, 16.7 Hz); **<sup>13</sup>C NMR** (100 MHz, CDCl<sub>3</sub>) δ 149.2, 135.5, 130.3, 122.1 (t, <sup>3</sup>*J*<sub>C-F</sub> = 2.8 Hz), 116.8 (t, <sup>1</sup>*J*<sub>C-F</sub> = 245.3 Hz), 112.6, 111.1, 45.8 (t, <sup>2</sup>*J*<sub>C-F</sub> = 20.9 Hz), 30.3; **HRMS** (ESI) *m/z*: [M+H]<sup>+</sup> Calcd for C<sub>16</sub>H<sub>17</sub>F<sub>2</sub>Cl<sub>2</sub>N<sub>2</sub>: 345.0732, Found: 345.0730.

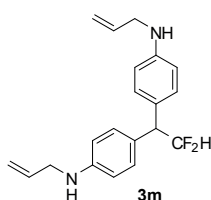

**4,4'-(2,2-difluoroethane-1,1-diyl)bis(*N*-allylaniline) (3m):** The crude products were purified by column chromatography with petroleum ether/ethyl acetate (30/1 to 20/1, v/v) as eluent to give compound **3m** (pale yellow oil, 90.3 mg, 0.28 mmol, 55% yield). **<sup>1</sup>H NMR** (400 MHz, CDCl<sub>3</sub>) δ 7.12 (d, *J* = 8.4 Hz, 4H), 6.60 (d, *J* = 8.6 Hz, 4H), 6.21 (td, *J* = 56.4, 4.4 Hz, 1H), 5.96 (ddd, *J* = 22.5, 10.5, 5.4 Hz, 2H), 5.30 (dd, *J* = 17.2, 1.5 Hz, 2H), 5.18 (dd, *J* = 10.3, 1.4 Hz, 2H), 4.20 (td, *J* = 16.2, 4.3 Hz, 1H), 3.77 (d, *J* = 5.4 Hz, 4H); **<sup>19</sup>F NMR** (376 MHz, CDCl<sub>3</sub>) δ -117.89 (dd, *J* = 56.4, 16.7 Hz, 2F); **<sup>13</sup>C NMR** (100 MHz, CDCl<sub>3</sub>) δ 147.1, 135.4, 129.7, 126.4 (t, <sup>3</sup>*J*<sub>C-F</sub> = 3.6 Hz), 117.4 (t, <sup>1</sup>*J*<sub>C-F</sub> = 244.0 Hz), 116.2, 112.9, 53.3 (t, <sup>2</sup>*J*<sub>C-F</sub> = 20.3 Hz), 46.5; **HRMS** (ESI) *m/z*: [M+H]<sup>+</sup> Calcd for C<sub>20</sub>H<sub>23</sub>F<sub>2</sub>N<sub>2</sub>: 329.1824, Found: 329.1824.

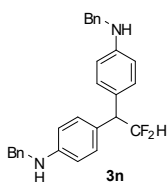

**4,4'-(2,2-difluoroethane-1,1-diyl)bis(*N*-benzylaniline) (3n):** The crude products were purified by column chromatography with petroleum ether/ethyl acetate (30/1 to 20/1, v/v) as eluent to give compound **3n** (yellow solid, 113.6 mg, 0.26 mmol, 53% yield). M.p.: 117–119 °C; **<sup>1</sup>H NMR** (400 MHz, CDCl<sub>3</sub>) δ 7.42–7.34 (m, 8H), 7.33–7.27 (m, 2H), 7.12 (d, *J* = 8.5 Hz, 4H), 6.61 (d, *J* = 8.6 Hz, 4H), 6.21 (td, *J* = 56.3, 4.4 Hz, 1H), 4.32 (s, 4H), 4.20 (td, *J* = 16.2, 4.3 Hz, 1H), 4.05 (s, 2H); **<sup>19</sup>F NMR** (376 MHz, CDCl<sub>3</sub>) δ -117.86 (dd, *J* = 56.5, 16.9 Hz, 2F); **<sup>13</sup>C NMR** (100 MHz, CDCl<sub>3</sub>) δ 147.2, 139.3, 129.8, 128.6, 127.5, 127.2, 126.5 (t, <sup>3</sup>*J*<sub>C-F</sub> = 3.5 Hz), 117.4 (t, <sup>1</sup>*J*<sub>C-F</sub> = 244.1 Hz), 112.8, 53.4 (t, <sup>2</sup>*J*<sub>C-F</sub> = 20.3 Hz), 48.3; **HRMS** (ESI) *m/z*: [M+H]<sup>+</sup> Calcd for C<sub>28</sub>H<sub>27</sub>F<sub>2</sub>N<sub>2</sub>: 429.2137, Found: 429.2132.

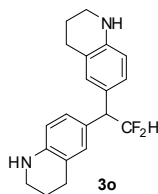

**6,6'-(2,2-difluoroethane-1,1-diyl)bis(1,2,3,4-tetrahydroquinoline) (3o):** The crude products were purified by column chromatography with petroleum ether/ethyl acetate (30/1 to 20/1, v/v) as eluent to give compound **3o** (yellow oil, 116.4 mg, 0.36 mmol, 71% yield). **<sup>1</sup>H NMR** (400 MHz, CDCl<sub>3</sub>) δ 7.01 – 6.79 (m, 4H), 6.44 (d, *J* = 8.1 Hz, 2H), 6.20 (td, *J* = 56.5, 4.6 Hz, 1H), 4.24 – 3.97 (m, 1H), 3.64 (s, 2H), 3.35 – 3.13 (m, 4H), 2.76 (t, *J* = 6.4 Hz, 4H), 1.94 (ddd, *J* = 15.3, 7.6, 4.4 Hz, 4H); **<sup>19</sup>F NMR** (376 MHz, CDCl<sub>3</sub>) δ -117.67 (dd, *J* = 56.5, 16.8 Hz, 2F); **<sup>13</sup>C NMR** (100 MHz, CDCl<sub>3</sub>) δ 143.7, 130.0, 127.1, 126.0 (t, <sup>3</sup>*J*<sub>C-F</sub> = 3.6 Hz), 121.4, 117.6 (t, <sup>1</sup>*J*<sub>C-F</sub> = 243.9 Hz), 114.1, 53.6 (t, <sup>2</sup>*J*<sub>C-F</sub> = 20.4 Hz), 41.9, 26.9, 22.0; **HRMS** (ESI) *m/z*: [M+H]<sup>+</sup> Calcd for C<sub>20</sub>H<sub>23</sub>F<sub>2</sub>N<sub>2</sub>: 329.1824, Found: 329.1820.

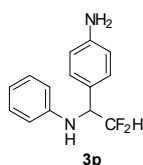

**N-(1-(4-aminophenyl)-2,2-difluoroethyl)aniline (3p):** The crude products were purified by column chromatography with petroleum ether/ethyl acetate (20/1 to 15/1, v/v) as eluent to give compound **3p** (yellow oil, 45.9 mg, 0.19 mmol, 37% yield). **<sup>1</sup>H NMR** (400 MHz, CDCl<sub>3</sub>) δ 7.19 (d, *J* = 8.3 Hz, 2H), 7.14 (t, *J* = 7.9 Hz, 2H), 6.73 (t, *J* = 7.3 Hz, 1H), 6.68 (d, *J* = 8.4 Hz, 2H), 6.62 (d, *J* = 7.8 Hz, 2H), 5.94 (td, *J* = 56.0, 3.0 Hz, 1H), 4.59 (td, *J* = 13.2, 2.8 Hz, 1H), 4.28 (s, 1H), 3.61 (s, 2H); **<sup>19</sup>F NMR** (376 MHz, CDCl<sub>3</sub>) δ -124.94 (ddd, *J* = 277.4, 56.1, 13.2 Hz, 1F), -127.21 (ddd, *J* = 277.4, 56.0, 13.2 Hz, 1F); **<sup>13</sup>C NMR** (100 MHz, CDCl<sub>3</sub>) δ 146.6, 146.2, 129.2, 128.7, 125.0 (dd, <sup>3</sup>*J*<sub>C-F</sub> = 3.4, 1.2 Hz), 118.5, 116.0 (t, <sup>1</sup>*J*<sub>C-F</sub> = 246.9 Hz), 115.3, 113.9, 59.7 (t, <sup>2</sup>*J*<sub>C-F</sub> = 21.8 Hz); **HRMS** (ESI) *m/z*: [M+H]<sup>+</sup> Calcd for C<sub>14</sub>H<sub>15</sub>F<sub>2</sub>N<sub>2</sub>: 249.1198, Found: 249.1196.

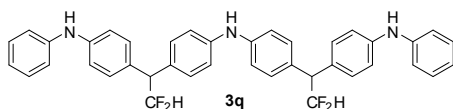

**bis(4-(2,2-difluoro-1-(4-(phenylamino)phenyl)ethyl)phenyl)amine (3q):** The crude products were purified by column chromatography with petroleum ether/ethyl acetate (30/1 to 20/1, v/v) as eluent to give compound **3q** (white solid, 72.6 mg, 0.12 mmol, 46% yield). M.p.: 142–144 °C; **<sup>1</sup>H NMR** (400 MHz, CDCl<sub>3</sub>) δ 7.35 – 7.29 (m, 6H), 7.24 (d, *J* = 8.4 Hz, 8H), 7.14 – 7.06 (m, 12H), 6.99 (t, *J* = 7.3 Hz, 2H), 6.30 (td, *J* = 56.1, 4.2 Hz, 2H), 4.33 (dt, *J* = 15.8, 8.0 Hz, 2H); **<sup>19</sup>F NMR** (376 MHz, CDCl<sub>3</sub>) δ -118.02 (dd, *J* = 56.1, 16.1 Hz, 4F); **<sup>13</sup>C NMR** (100 MHz, CDCl<sub>3</sub>) δ 142.7, 142.4, 142.1, 129.9, 129.6, 129.3, 121.3, 118.1, 117.8, 117.6, 117.1 (t, <sup>1</sup>*J*<sub>C-F</sub> = 244.3 Hz), 53.7 (t, <sup>2</sup>*J*<sub>C-F</sub> = 20.5 Hz); **HRMS** (ESI) *m/z*: [M+H]<sup>+</sup> Calcd for C<sub>40</sub>H<sub>34</sub>F<sub>4</sub>N<sub>3</sub>: 632.2684, Found: 632.2689.



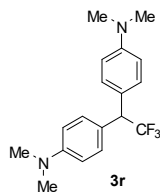

**4,4'-(2,2,2-trifluoroethane-1,1-diyl)bis(*N,N*-dimethylaniline) (3r):** The crude products were purified by column chromatography with petroleum ether/ethyl acetate (30/1 to 20/1, v/v) as eluent to give compound **3r** (white solid, 111.2 mg, 0.34 mmol, 69% yield). M.p.: 115–117 °C; **<sup>1</sup>H NMR** (400 MHz, CDCl<sub>3</sub>) δ 7.22 (d, *J* = 8.6 Hz, 4H), 6.68 (d, *J* = 8.8 Hz, 4H), 4.49 (q, *J* = 10.2 Hz, 1H), 2.93 (s, 12H); **<sup>19</sup>F NMR** (376 MHz, CDCl<sub>3</sub>) δ -66.43 (d, *J* = 10.2 Hz, 3F); **<sup>13</sup>C NMR** (100 MHz, CDCl<sub>3</sub>) δ 149.8, 129.7, 126.8 (d, <sup>1</sup>*J*<sub>C-F</sub> = 280.2 Hz), 123.8, 112.4, 53.8 (q, <sup>2</sup>*J*<sub>C-F</sub> = 27.1 Hz), 40.5; **HRMS** (ESI) *m/z*: [M+H]<sup>+</sup> Calcd for C<sub>18</sub>H<sub>22</sub>F<sub>3</sub>N<sub>2</sub>: 323.1730, Found: 323.1726.

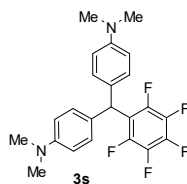

**4,4'-((perfluorophenyl)methylene)bis(*N,N*-dimethylaniline) (3s):** The crude products were purified by column chromatography with petroleum ether/ethyl acetate (20/1, v/v) as eluent to give compound **3s** (pale green solid, 185.3 mg, 0.44 mmol, 88% yield). M.p.: 120–122 °C; **<sup>1</sup>H NMR** (400 MHz, CDCl<sub>3</sub>) δ 7.06 (d, *J* = 8.6 Hz, 4H), 6.67 (d, *J* = 8.8 Hz, 4H), 5.71 (s, 1H), 2.93 (s, 12H); **<sup>19</sup>F NMR** (376 MHz, CDCl<sub>3</sub>) δ -140.09 (dd, *J* = 23.8, 8.7 Hz, 2F), -157.48 (t, *J* = 21.4 Hz, 1F), -162.33 (td, *J* = 23.5, 8.9 Hz, 2F); **<sup>13</sup>C{<sup>1</sup>H} NMR** (100 MHz, CDCl<sub>3</sub>) δ 149.4, 146.5 – 146.1 (m), 144.0 – 143.5 (m), 141.1 – 140.8 (m), 139.0 – 138.3 (m), 136.7 – 136.1 (m), 129.2, 128.3, 119.0 – 118.4 (m), 112.4, 44.1, 40.5; **HRMS** (ESI) *m/z*: [M + Na]<sup>+</sup> Calcd for C<sub>23</sub>H<sub>21</sub>F<sub>5</sub>N<sub>2</sub>Na 443.1517; Found 443.1523.

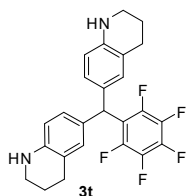

**6,6'-((perfluorophenyl)methylene)bis(1,2,3,4-tetrahydroquinoline) (3t):** The crude products were purified by column chromatography with petroleum ether/ethyl acetate (10/1, v/v) as eluent to give compound **3t** (white solid, 188.9 mg, 0.42 mmol, 85% yield). M.p.: 93–95 °C; **<sup>1</sup>H NMR** (400 MHz, CDCl<sub>3</sub>) δ 6.76 (d, *J* = 9.5 Hz, 4H), 6.56 – 6.28 (m, 2H), 5.57 (s, 1H), 3.80 (s, 2H), 3.38 – 3.14 (m, 4H), 2.69 (t, *J* = 6.4 Hz, 4H), 2.02 – 1.77 (m, 4H); **<sup>19</sup>F NMR** (376 MHz, CDCl<sub>3</sub>) δ -139.98 (dd, *J* = 24.3, 7.2 Hz, 2F), -157.72 (t, *J* = 21.6 Hz, 1F), -162.43 (td, *J* = 23.4, 8.8 Hz, 2F); **<sup>13</sup>C{<sup>1</sup>H} NMR** (100 MHz, CDCl<sub>3</sub>) δ 146.4 – 146.2 (m), 143.9 – 143.7 (m), 143.5, 136.6 – 136.3 (m), 136.7 – 136.2 (m), 129.6, 128.8, 126.9, 121.3, 119.1 – 118.7 (m), 114.0, 44.4, 41.9, 27.0, 22.1; **HRMS** (ESI) *m/z*: [M - H]<sup>-</sup> Calcd for C<sub>25</sub>H<sub>20</sub>F<sub>5</sub>N<sub>2</sub> 443.1541; Found 443.1537.

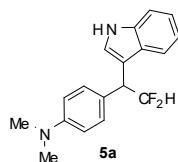

**4-(2,2-difluoro-1-(1H-indol-3-yl)ethyl)-N,N-dimethylaniline (5a):** The crude products were purified by column chromatography with petroleum ether/ethyl acetate (20/1 to 15/1, v/v) as eluent to give compound **5a** (white solid, 129.6 mg, 0.43 mmol, 85% yield). M.p.: 124–126 °C; **<sup>1</sup>H NMR** (400 MHz, CDCl<sub>3</sub>) δ 8.12 (s, 1H), 7.41 (d, *J* = 8.0 Hz, 1H), 7.36 (d, *J* = 8.2 Hz, 1H), 7.23 (d, *J* = 8.6 Hz, 3H), 7.18 (t, *J* = 7.3 Hz, 1H), 7.05 (t, *J* = 7.5 Hz, 1H), 6.70 (d, *J* = 7.8 Hz, 2H), 6.25 (td, *J* = 56.5, 3.7 Hz, 1H), 4.62 (td, *J* = 16.4, 3.5 Hz, 1H), 2.92 (s, 6H); **<sup>19</sup>F NMR** (376 MHz, CDCl<sub>3</sub>) δ -117.61 (ddd, *J* = 274.3, 56.5, 16.4 Hz, 1F), -118.69 (ddd, *J* = 274.2, 56.5, 17.0 Hz, 1F); **<sup>13</sup>C NMR** (100 MHz, CDCl<sub>3</sub>) δ 136.1, 129.9, 127.0, 122.4, 122.3, 119.7, 119.3, 117.4 (t, <sup>1</sup>*J*<sub>C-F</sub> = 244.7 Hz), 112.7 (t, <sup>3</sup>*J*<sub>C-F</sub> = 8.8 Hz), 112.2, 111.0, 46.2 (t, <sup>2</sup>*J*<sub>C-F</sub> = 21.2 Hz), 40.7; **HRMS** (ESI) *m/z*: [M+H]<sup>+</sup> Calcd for C<sub>18</sub>H<sub>19</sub>F<sub>2</sub>N<sub>2</sub>: 301.1511, Found: 301.1510.

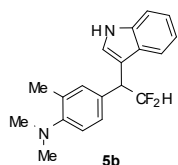

**4-(2,2-difluoro-1-(1H-indol-3-yl)ethyl)-N,N,2-trimethylaniline (5b):** The crude products were purified by column chromatography with petroleum ether/ethyl acetate (20/1 to 15/1, v/v) as eluent to give compound **5b** (white solid, 114.7 mg, 0.36 mmol, 73% yield). M.p.: 129–131 °C; **<sup>1</sup>H NMR** (400 MHz, CDCl<sub>3</sub>) δ 8.13 (s, 1H), 7.47 (d, *J* = 8.0 Hz, 1H), 7.36 (d, *J* = 8.1 Hz, 1H), 7.25 – 7.13 (m, 4H), 7.09 (t, *J* = 7.5 Hz, 1H), 6.98 (d, *J* = 8.1 Hz, 1H), 6.28 (td, *J* = 56.5, 3.7 Hz, 1H), 4.64 (td, *J* = 16.6, 3.6 Hz, 1H), 2.69 (s, 6H), 2.31 (s, 3H); **<sup>19</sup>F NMR** (376 MHz, CDCl<sub>3</sub>) δ -117.38 (ddd, *J* = 274.3, 56.4, 15.2 Hz, 1F), -118.48 (ddd, *J* = 274.4, 56.5, 17.1 Hz, 1F); **<sup>13</sup>C NMR** (100 MHz, CDCl<sub>3</sub>) δ 151.8, 136.0, 131.9, 130.5 (t, <sup>3</sup>*J*<sub>C-F</sub> = 2.8 Hz), 127.1, 127.0, 122.6, 122.3, 119.7, 119.1, 118.3, 117.3 (t, <sup>1</sup>*J*<sub>C-F</sub> = 244.9 Hz), 111.9 (t, <sup>3</sup>*J*<sub>C-F</sub> = 3.9 Hz), 111.1, 46.4 (t, <sup>2</sup>*J*<sub>C-F</sub> = 21.0 Hz), 44.1; **HRMS** (ESI) *m/z*: [M+H]<sup>+</sup> Calcd for C<sub>19</sub>H<sub>21</sub>F<sub>2</sub>N<sub>2</sub>: 315.1668, Found: 315.1667.

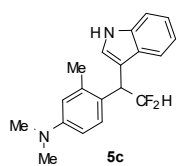

**4-(2,2-difluoro-1-(1H-indol-3-yl)ethyl)-N,N,3-trimethylaniline (5c):** The crude products were purified by column chromatography with petroleum ether/ethyl acetate (20/1 to 15/1, v/v) as eluent to give compound **5c** (white solid, 97.5 mg, 0.31 mmol, 62% yield). M.p.: 137–139 °C; **<sup>1</sup>H NMR** (400 MHz, CDCl<sub>3</sub>) δ 8.08 (s, 1H), 7.62 (d, *J* = 7.9 Hz, 1H), 7.36 (d, *J* = 8.1 Hz, 1H), 7.27 (d, *J* = 1.6 Hz, 1H), 7.23 (s, 1H), 7.22 – 7.16 (m, 2H), 7.13 – 7.06 (m, 2H), 6.28 (td, *J* = 56.7, 3.8 Hz, 1H), 5.63 (ddd, *J* = 18.7, 15.8, 3.7 Hz, 1H), 2.69 (s, 6H), 2.28 (s, 3H); **<sup>19</sup>F NMR** (376 MHz, CDCl<sub>3</sub>) δ -115.80 (ddd, *J* = 271.8, 56.6, 15.5 Hz, 1F), -118.61 (ddd, *J* = 273.6, 57.0, 18.4 Hz, 1F); **<sup>13</sup>C NMR** (100 MHz, CDCl<sub>3</sub>) δ 150.7, 135.9, 133.7, 133.0 (t, <sup>3</sup>*J*<sub>C-F</sub> = 3.0 Hz), 130.1, 128.8, 127.5, 122.9, 122.2, 120.9, 119.6, 119.4, 118.0 (t, <sup>1</sup>*J*<sub>C-F</sub> = 245.1 Hz), 112.4 (t, <sup>3</sup>*J*<sub>C-F</sub> = 3.7 Hz), 111.0,

46.0, 39.5 (t,  $^2J_{C-F}$  = 21.2 Hz), 21.1; **HRMS** (ESI) m/z:  $[M+H]^+$  Calcd for  $C_{19}H_{21}F_2N_2$ : 315.1668, Found: 315.1666.

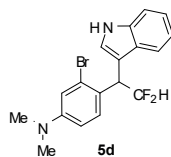

**3-bromo-4-(2,2-difluoro-1-(1H-indol-3-yl)ethyl)-N,N-dimethylaniline (5d)**: The crude products were purified by column chromatography with petroleum ether/ethyl acetate (20/1 to 15/1, v/v) as eluent to give compound **5d** (white solid, 142.7 mg, 0.38 mmol, 75% yield). M.p.: 156–158 °C;  **$^1H$  NMR** (400 MHz,  $CDCl_3$ )  $\delta$  8.12 (s, 1H), 7.43 (d,  $J$  = 7.9 Hz, 1H), 7.36 (d,  $J$  = 8.1 Hz, 1H), 7.31 (s, 1H), 7.18 (t,  $J$  = 7.5 Hz, 1H), 7.11 (d,  $J$  = 8.7 Hz, 1H), 7.06 (t,  $J$  = 7.5 Hz, 1H), 6.94 (d,  $J$  = 1.9 Hz, 1H), 6.54 (d,  $J$  = 8.7 Hz, 1H), 6.26 (td,  $J$  = 56.2, 2.5 Hz, 2H), 5.28 (dd,  $J$  = 24.5, 8.9 Hz, 1H), 2.91 (s, 6H);  **$^{19}F$  NMR** (376 MHz,  $CDCl_3$ )  $\delta$  -117.93 (ddd,  $J$  = 274.4, 56.3, 14.6 Hz, 1F), -120.92 (ddd,  $J$  = 277.1, 56.4, 17.6 Hz, 1F);  **$^{13}C$  NMR** (100 MHz,  $CDCl_3$ )  $\delta$  150.5, 135.9, 130.9, 127.1, 125.9, 122.9 (dd,  $^3J_{C-F}$  = 4.3, 1.9 Hz), 122.5, 122.3, 119.8, 119.3, 117.0 (t,  $^1J_{C-F}$  = 245.5 Hz), 115.8, 111.8, 111.6 (dd,  $^3J_{C-F}$  = 3.9, 1.6 Hz), 111.0, 44.7 (t,  $^2J_{C-F}$  = 21.2 Hz), 40.2; **HRMS** (ESI) m/z:  $[M+H]^+$  Calcd for  $C_{18}H_{18}BrF_2N_2$ : 379.0616, Found: 379.0621.

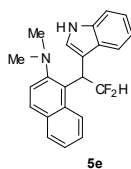

**1-(2,2-difluoro-1-(1H-indol-3-yl)ethyl)-N,N-dimethylnaphthalen-2-amine (5e)**: The crude products were purified by column chromatography with petroleum ether/ethyl acetate (20/1 to 15/1, v/v) as eluent to give compound **5e** (white solid, 105.1 mg, 0.30 mmol, 60% yield). M.p.: 112–113 °C;  **$^1H$  NMR** (400 MHz,  $CDCl_3$ )  $\delta$  8.38 – 8.32 (m, 1H), 8.17 – 8.12 (m, 1H), 8.04 (s, 1H), 7.54 – 7.49 (m, 2H), 7.45 (t,  $J$  = 7.5 Hz, 2H), 7.34 (d,  $J$  = 8.1 Hz, 1H), 7.19 (t,  $J$  = 7.5 Hz, 1H), 7.12 (s, 1H), 7.05 (dd,  $J$  = 17.9, 7.8 Hz, 2H), 6.46 (td,  $J$  = 56.2, 3.3 Hz, 1H), 5.58 – 5.47 (m, 1H), 2.89 (s, 6H);  **$^{19}F$  NMR** (376 MHz,  $CDCl_3$ )  $\delta$  -115.66 (ddd,  $J$  = 274.4, 56.5, 13.9 Hz, 1F), -118.55 (ddd,  $J$  = 274.4, 56.3, 17.0 Hz, 1F);  **$^{13}C$  NMR** (100 MHz,  $CDCl_3$ )  $\delta$  150.5, 136.1, 133.0, 129.2, 127.3 (dd,  $^3J_{C-F}$  = 4.0, 3.1 Hz), 127.0, 126.3, 125.0, 124.9, 123.6, 123.4, 122.3, 119.7, 119.2, 117.6 (t,  $^1J_{C-F}$  = 245.0 Hz), 113.5, 112.2 (t,  $^3J_{C-F}$  = 3.5 Hz), 111.1, 45.2, 41.7 (t,  $^2J_{C-F}$  = 21.4 Hz); **HRMS** (ESI) m/z:  $[M+H]^+$  Calcd for  $C_{22}H_{21}F_2N_2$ : 351.1668, Found: 351.1667.

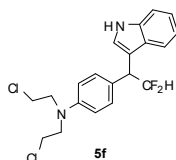

**N,N-bis(2-chloroethyl)-4-(2,2-difluoro-1-(1H-indol-3-yl)ethyl)aniline (5f)**: The crude products were purified by column chromatography with petroleum ether/ethyl acetate (30/1 to 15/1, v/v) as eluent to give compound **5f** (white solid, 99.3 mg, 0.25 mmol, 50% yield). M.p.: 136–138 °C;  **$^1H$  NMR** (400 MHz,  $CDCl_3$ )  $\delta$  8.00 (s, 1H), 7.39 (d,  $J$  = 8.0 Hz, 1H), 7.30 (d,  $J$  = 8.1 Hz, 1H), 7.19 (dd,  $J$  = 13.2, 7.6 Hz, 4H), 7.04 (t,  $J$  = 7.5 Hz, 1H), 6.56 (d,  $J$  = 8.4 Hz, 2H), 6.22 (td,  $J$  = 56.5, 3.3

Hz, 1H), 4.66 – 4.52 (m, 1H), 3.62 (t,  $J = 7.0$  Hz, 4H), 3.53 (t,  $J = 6.7$  Hz, 4H);  $^{19}\text{F}$  NMR (376 MHz,  $\text{CDCl}_3$ )  $\delta$  -116.99 (ddd,  $J = 274.4, 56.4, 14.6$  Hz, 1F), -119.09 (ddd,  $J = 275.5, 56.5, 18.3$  Hz, 1F);  $^{13}\text{C}$  NMR (100 MHz,  $\text{CDCl}_3$ )  $\delta$  145.3, 136.0, 130.5, 126.8, 125.4 (t,  $^3J_{\text{C-F}} = 2.7$  Hz), 122.4, 122.3, 119.7, 119.1, 117.2 (t,  $^1J_{\text{C-F}} = 244.8$  Hz), 111.8 (dd,  $^3J_{\text{C-F}} = 5.2, 2.8$  Hz), 111.2, 53.3, 46.0 (t,  $^2J_{\text{C-F}} = 21.1$  Hz), 40.3; HRMS (ESI)  $m/z$ :  $[\text{M}+\text{H}]^+$  Calcd for  $\text{C}_{20}\text{H}_{21}\text{Cl}_2\text{F}_2\text{N}_2$ : 397.1045, Found: 397.1050.

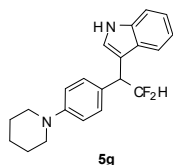

**3-(2,2-difluoro-1-(4-(piperidin-1-yl)phenyl)ethyl)-1H-indole (5g):** The crude products were purified by column chromatography with petroleum ether/ethyl acetate (25/1 to 15/1, v/v) as eluent to give compound **5g** (white solid, 107.3 mg, 0.31 mmol, 63% yield). M.p.: 111–113 °C;  $^1\text{H}$  NMR (400 MHz,  $\text{CDCl}_3$ )  $\delta$  8.09 (s, 1H), 7.39 (d,  $J = 8.0$  Hz, 1H), 7.31 (d,  $J = 8.1$  Hz, 1H), 7.22 (d,  $J = 8.8$  Hz, 2H), 7.19 – 7.12 (m, 2H), 7.03 (t,  $J = 7.5$  Hz, 1H), 6.87 (d,  $J = 8.7$  Hz, 2H), 6.23 (td,  $J = 56.5, 3.7$  Hz, 1H), 4.60 (td,  $J = 16.4, 3.6$  Hz, 1H), 3.13 – 3.09 (m, 4H), 1.68 (dt,  $J = 11.2, 5.8$  Hz, 4H), 1.54 (dt,  $J = 11.2, 5.8$  Hz, 2H);  $^{19}\text{F}$  NMR (376 MHz,  $\text{CDCl}_3$ )  $\delta$  -117.53 (ddd,  $J = 274.2, 56.4, 15.1$  Hz, 1F), -118.61 (ddd,  $J = 275.1, 56.5, 17.1$  Hz, 1F);  $^{13}\text{C}$  NMR (100 MHz,  $\text{CDCl}_3$ )  $\delta$  151.3, 136.0, 129.8, 127.0, 122.5, 122.3, 119.6, 119.2, 116.2, 117.4 (t,  $^1J_{\text{C-F}} = 244.8$  Hz), 112.0 (t,  $^3J_{\text{C-F}} = 3.9$  Hz), 111.1, 50.4, 46.3 (t,  $^2J_{\text{C-F}} = 21.0$  Hz), 25.8, 24.2; HRMS (ESI)  $m/z$ :  $[\text{M}+\text{H}]^+$  Calcd for  $\text{C}_{21}\text{H}_{23}\text{F}_2\text{N}_2$ : 341.1824, Found: 341.1819.

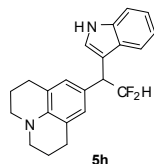

**9-(2,2-difluoro-1-(1H-indol-3-yl)ethyl)-2,3,6,7-tetrahydro-1H,5H-pyrido[3,2,1-ij]quinoline (5h):** The crude products were purified by column chromatography with petroleum ether/ethyl acetate (30/1 to 20/1, v/v) as eluent to give compound **5h** (white solid, 96.8 mg, 0.28 mmol, 55% yield). M.p.: 119–120 °C;  $^1\text{H}$  NMR (400 MHz,  $\text{CDCl}_3$ )  $\delta$  8.17 (s, 1H), 7.49 (d,  $J = 7.9$  Hz, 1H), 7.36 (d,  $J = 8.1$  Hz, 1H), 7.23 (s, 1H), 7.17 (t,  $J = 7.9$  Hz, 1H), 7.07 (t,  $J = 7.1$  Hz, 1H), 6.76 (s, 2H), 6.21 (td,  $J = 56.7, 3.7$  Hz, 1H), 4.49 (td,  $J = 16.6, 3.6$  Hz, 1H), 3.20 – 3.00 (m, 4H), 2.77 – 2.63 (m, 4H), 2.00 – 1.87 (m, 4H);  $^{19}\text{F}$  NMR (376 MHz,  $\text{CDCl}_3$ )  $\delta$  -117.79 (dd,  $J = 16.5, 7.4$  Hz, 1F), -117.94 (dd,  $J = 16.6, 7.6$  Hz, 1F);  $^{13}\text{C}$  NMR (100 MHz,  $\text{CDCl}_3$ )  $\delta$  142.2, 136.0, 127.5, 127.2, 123.5 (t,  $^3J_{\text{C-F}} = 3.2$  Hz), 122.5, 122.2, 121.4, 119.6, 119.3, 117.6 (t,  $^1J_{\text{C-F}} = 244.1$  Hz), 112.4 (t,  $^3J_{\text{C-F}} = 3.9$  Hz), 111.0, 49.9, 46.3 (t,  $^2J_{\text{C-F}} = 21.0$  Hz), 27.7, 22.0; HRMS (ESI)  $m/z$ :  $[\text{M}+\text{H}]^+$  Calcd for  $\text{C}_{22}\text{H}_{23}\text{F}_2\text{N}_2$ : 353.1824, Found: 353.1820.

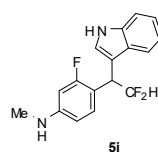

**4-(2,2-difluoro-1-(1*H*-indol-3-yl)ethyl)-3-fluoro-*N*-methylaniline (5i):** The crude products were purified by column chromatography with petroleum ether/ethyl acetate (20/1 to 15/1, v/v) as eluent to give compound **5i** (yellow oil, 130.8 mg, 0.43 mmol, 86% yield). **<sup>1</sup>H NMR** (400 MHz, CDCl<sub>3</sub>) δ 8.12 (s, 1H), 7.48 (d, *J* = 7.9 Hz, 1H), 7.35 (d, *J* = 8.1 Hz, 1H), 7.20 (t, *J* = 7.2 Hz, 1H), 7.12 – 7.00 (m, 2H), 6.47 – 6.10 (m, 3H), 5.00 (td, *J* = 16.2, 3.6 Hz, 1H), 3.79 (brs, 1H), 2.78 (s, 3H); **<sup>19</sup>F NMR** (376 MHz, CDCl<sub>3</sub>) δ -117.34 – -117.47 (m, 1F), -118.35 (dd, *J* = 56.5, 16.6 Hz, 2F); **<sup>13</sup>C NMR** (100 MHz, CDCl<sub>3</sub>) δ 161.9 (d, <sup>1</sup>*J*<sub>C-F</sub> = 243.3 Hz), 150.3 (d, <sup>3</sup>*J*<sub>C-F</sub> = 11.3 Hz), 135.9, 132.0 (d, <sup>3</sup>*J*<sub>C-F</sub> = 10.1 Hz), 131.0 (d, <sup>3</sup>*J*<sub>C-F</sub> = 5.9 Hz), 128.6 (d, <sup>3</sup>*J*<sub>C-F</sub> = 12.0 Hz), 126.9, 122.6, 122.3, 119.7, 118.9, 116.9 (td, <sup>1</sup>*J*<sub>C-F</sub> = 244.8, 1.3 Hz), 111.5 (t, <sup>3</sup>*J*<sub>C-F</sub> = 3.4 Hz), 111.3 (t, <sup>3</sup>*J*<sub>C-F</sub> = 3.2 Hz), 111.1, 108.7 (d, <sup>3</sup>*J*<sub>C-F</sub> = 2.5 Hz), 98.8, 98.5, 39.0 (t, <sup>2</sup>*J*<sub>C-F</sub> = 22.8 Hz), 30.5; **HRMS** (ESI) *m/z*: [M+H]<sup>+</sup> Calcd for C<sub>17</sub>H<sub>16</sub>F<sub>3</sub>N<sub>2</sub>: 305.1261, Found: 305.1261.

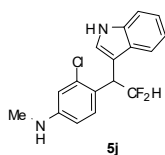

**3-chloro-4-(2,2-difluoro-1-(1*H*-indol-3-yl)ethyl)-*N*-methylaniline (5j):** The crude products were purified by column chromatography with petroleum ether/ethyl acetate (20/1 to 15/1, v/v) as eluent to give compound **5j** (yellow solid, 136.3 mg, 0.42 mmol, 85% yield). M.p.: 97–99 °C; **<sup>1</sup>H NMR** (400 MHz, CDCl<sub>3</sub>) δ 8.01 (s, 1H), 7.37 (d, *J* = 8.0 Hz, 1H), 7.29 (d, *J* = 8.1 Hz, 1H), 7.23 (d, *J* = 1.7 Hz, 1H), 7.20 – 7.11 (m, 3H), 7.04 (t, *J* = 7.5 Hz, 1H), 6.55 (d, *J* = 8.4 Hz, 1H), 6.19 (td, *J* = 56.4, 3.5 Hz, 1H), 4.63 – 4.49 (m, 1H), 4.28 (s, 1H), 2.81 (s, 3H); **<sup>19</sup>F NMR** (376 MHz, CDCl<sub>3</sub>) δ -117.10 (ddd, *J* = 274.6, 56.4, 14.4 Hz, 1F), -119.34 (ddd, *J* = 275.2, 56.5, 18.7 Hz, 1F); **<sup>13</sup>C NMR** (100 MHz, CDCl<sub>3</sub>) δ 144.3, 136.0, 129.6, 128.7, 126.8, 125.1 (t, <sup>3</sup>*J*<sub>C-F</sub> = 2.8 Hz), 122.4, 122.3, 119.7, 119.0, 118.9, 117.0 (t, <sup>1</sup>*J*<sub>C-F</sub> = 244.8 Hz), 111.4 (dd, <sup>3</sup>*J*<sub>C-F</sub> = 5.2, 2.6 Hz), 111.2, 110.4, 45.9 (t, <sup>2</sup>*J*<sub>C-F</sub> = 21.2 Hz), 30.3; **HRMS** (ESI) *m/z*: [M+H]<sup>+</sup> Calcd for C<sub>17</sub>H<sub>16</sub>ClF<sub>2</sub>N<sub>2</sub>: 321.0965, Found: 321.0964.

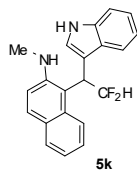

**1-(2,2-difluoro-1-(1*H*-indol-3-yl)ethyl)-*N*-methylnaphthalen-2-amine (5k):** The crude products were purified by column chromatography with petroleum ether/ethyl acetate (20/1 to 15/1, v/v) as eluent to give compound **5k** (white solid, 99.2 mg, 0.29 mmol, 59% yield). M.p.: 87–89 °C; **<sup>1</sup>H NMR** (400 MHz, CDCl<sub>3</sub>) δ 8.13 (d, *J* = 8.1 Hz, 1H), 8.06 (s, 1H), 7.87 (d, *J* = 8.0 Hz, 1H), 7.46 (dq, *J* = 22.5, 7.8, 7.3 Hz, 4H), 7.34 (d, *J* = 8.1 Hz, 1H), 7.17 (dd, *J* = 15.2, 7.1 Hz, 2H), 7.03 (t, *J* = 7.5 Hz, 1H), 6.60 (d, *J* = 8.0 Hz, 1H), 6.58 – 6.28 (m, 1H), 5.53 – 5.38 (m, 1H), 3.00 (s, 3H); **<sup>19</sup>F NMR** (376 MHz, CDCl<sub>3</sub>) δ -115.66 (ddd, *J* = 274.1, 56.3, 12.7 Hz, 1F), -118.57 (ddd, *J* = 274.1, 56.4, 17.0 Hz, 1F); **<sup>13</sup>C NMR** (100 MHz, CDCl<sub>3</sub>) δ 143.7, 136.1, 132.5, 127.1 (d, <sup>3</sup>*J*<sub>C-F</sub> = 2.5 Hz), 126.3, 124.6, 124.0, 123.8, 123.5, 122.2, 120.6, 119.7, 119.3, 117.7 (t, <sup>1</sup>*J*<sub>C-F</sub> = 245.0 Hz), 112.5 (t, <sup>3</sup>*J*<sub>C-F</sub> = 3.4 Hz), 111.1, 104.0, 41.6 (t, <sup>2</sup>*J*<sub>C-F</sub> = 21.3 Hz), 31.2; **HRMS** (ESI) *m/z*: [M+H]<sup>+</sup> Calcd for C<sub>21</sub>H<sub>19</sub>F<sub>2</sub>N<sub>2</sub>: 337.1511, Found: 337.1518.

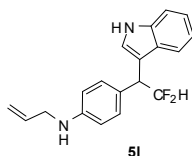

***N*-allyl-4-(2,2-difluoro-1-(1*H*-indol-3-yl)ethyl)aniline (5l):** The crude products were purified by column chromatography with petroleum ether/ethyl acetate (20/1 to 15/1, v/v) as eluent to give compound **5l** (white solid, 106.2 mg, 0.34 mmol, 68% yield). M.p.: 91–93 °C; **<sup>1</sup>H NMR** (400 MHz, CDCl<sub>3</sub>) δ 8.05 (s, 1H), 7.44 (d, *J* = 8.0 Hz, 1H), 7.34 (d, *J* = 8.1 Hz, 1H), 7.19 (d, *J* = 7.9 Hz, 4H), 7.08 (t, *J* = 7.5 Hz, 1H), 6.59 (d, *J* = 8.5 Hz, 2H), 6.26 (td, *J* = 56.5, 3.7 Hz, 1H), 5.96 (ddt, *J* = 15.7, 10.6, 5.4 Hz, 1H), 5.30 (d, *J* = 17.2 Hz, 1H), 5.18 (d, *J* = 10.3 Hz, 1H), 4.62 (td, *J* = 16.5, 3.5 Hz, 1H), 3.76 (d, *J* = 5.4 Hz, 2H); **<sup>19</sup>F NMR** (376 MHz, CDCl<sub>3</sub>) δ -117.49 (ddd, *J* = 274.1, 56.5, 16.4 Hz, 1F), -118.62 (ddd, *J* = 274.1, 56.5, 17.0 Hz, 1F); **<sup>13</sup>C NMR** (100 MHz, CDCl<sub>3</sub>) δ 147.3, 136.0, 135.43, 130.0, 127.0, 125.4 (t, <sup>3</sup>*J*<sub>C-F</sub> = 3.2 Hz), 122.5, 122.2, 119.6, 119.2, 117.4 (t, <sup>1</sup>*J*<sub>C-F</sub> = 244.7 Hz), 116.3, 112.9, 112.1 (t, <sup>3</sup>*J*<sub>C-F</sub> = 3.9 Hz), 111.1, 46.5, 46.3 (t, <sup>2</sup>*J*<sub>C-F</sub> = 21.1 Hz); **HRMS** (ESI) *m/z*: [M+H]<sup>+</sup> Calcd for C<sub>19</sub>H<sub>19</sub>F<sub>2</sub>N<sub>2</sub>: 313.1511, Found: 313.1509.

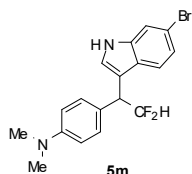

**4-(1-(6-bromo-1*H*-indol-3-yl)-2,2-difluoroethyl)-*N,N*-dimethylaniline (5m):** The crude products were purified by column chromatography with petroleum ether/ethyl acetate (20/1 to 15/1, v/v) as eluent to give compound **5m** (white solid, 142.6 mg, 0.37 mmol, 75% yield). M.p.: 142–143 °C; **<sup>1</sup>H NMR** (400 MHz, CDCl<sub>3</sub>) δ 8.12 (s, 1H), 7.44 (d, *J* = 8.0 Hz, 1H), 7.35 (d, *J* = 8.1 Hz, 1H), 7.31 (s, 1H), 7.18 (t, *J* = 7.6 Hz, 1H), 7.12 (d, *J* = 8.7 Hz, 1H), 7.06 (t, *J* = 7.5 Hz, 1H), 6.94 (d, *J* = 2.0 Hz, 1H), 6.54 (dd, *J* = 8.7, 2.0 Hz, 1H), 6.26 (td, *J* = 56.2, 2.6 Hz, 2H), 5.33 – 5.22 (m, 1H), 2.91 (s, 6H); **<sup>19</sup>F NMR** (376 MHz, CDCl<sub>3</sub>) δ -117.91 (ddd, *J* = 275.2, 56.3, 15.5 Hz, 1F), -120.90 (ddd, *J* = 274.7, 56.0, 18.0 Hz, 1F); **<sup>13</sup>C NMR** (100 MHz, CDCl<sub>3</sub>) δ 150.5, 135.9, 130.9, 127.1, 125.9, 122.9 (d, <sup>3</sup>*J*<sub>C-F</sub> = 4.4 Hz), 122.5, 122.3, 119.8, 119.3, 117.0 (t, <sup>1</sup>*J*<sub>C-F</sub> = 245.5 Hz), 115.8, 111.8, 111.6 (dd, <sup>3</sup>*J*<sub>C-F</sub> = 4.2, 1.8 Hz), 111.0, 44.7 (t, <sup>2</sup>*J*<sub>C-F</sub> = 21.2 Hz), 40.2; **HRMS** (ESI) *m/z*: [M+H]<sup>+</sup> Calcd for C<sub>18</sub>H<sub>18</sub>BrF<sub>2</sub>N<sub>2</sub>: 379.0616, Found: 379.0611.

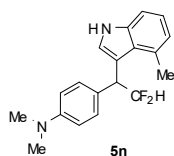

**4-(2,2-difluoro-1-(4-methyl-1*H*-indol-3-yl)ethyl)-*N,N*-dimethylaniline (5n):** The crude products were purified by column chromatography with petroleum ether/ethyl acetate (20/1 to 15/1, v/v) as eluent to give compound **5n** (white solid, 72.6 mg, 0.23 mmol, 46% yield). M.p.: 120–122 °C; **<sup>1</sup>H NMR** (400 MHz, CDCl<sub>3</sub>) δ 8.12 (s, 1H), 7.28 (s, 1H), 7.19 (t, *J* = 9.2 Hz, 3H), 7.12 – 7.05 (m, 1H), 6.81 (d, *J* = 7.1 Hz, 1H), 6.71 (d, *J* = 8.8 Hz, 2H), 6.27 (td, *J* = 56.6, 3.2 Hz, 1H), 4.98 (ddd, *J* = 19.7, 14.5, 3.0 Hz, 1H), 2.94 (s, 6H), 2.54 (s, 3H); **<sup>19</sup>F NMR** (376 MHz, CDCl<sub>3</sub>) δ -115.25 (ddd, *J* = 274.0, 56.5, 14.2 Hz, 1F), -120.03 (ddd, *J* = 273.7, 56.7, 20.0 Hz, 1F);

$^{13}\text{C}$  NMR (100 MHz,  $\text{CDCl}_3$ )  $\delta$  149.9, 136.4, 130.8, 130.4, 125.6, 124.9, 122.4, 122.3, 121.6, 117.6 (t,  $^1J_{\text{C-F}} = 244.7$  Hz), 112.5, 109.2, 46.9 (t,  $^2J_{\text{C-F}} = 20.6$  Hz), 40.6, 20.6; HRMS (ESI)  $m/z$ :  $[\text{M}+\text{H}]^+$  Calcd for  $\text{C}_{19}\text{H}_{21}\text{F}_2\text{N}_2$ : 315.1668, Found: 315.1665.

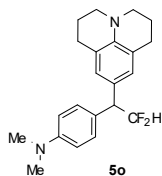

**4-(2,2-difluoro-1-(2,3,6,7-tetrahydro-1H,5H-pyrido[3,2,1-ij]quinolin-9-yl)ethyl)-N,N-dimethylaniline (5o):** The crude products were purified by column chromatography with petroleum ether/ethyl acetate (30/1 to 20/1, v/v) as eluent to give compound **5o** (yellow oil, 119.4 mg, 0.34 mmol, 67% yield).  $^1\text{H}$  NMR (400 MHz,  $\text{CDCl}_3$ )  $\delta$  7.19 (d,  $J = 8.7$  Hz, 2H), 6.71 (dd,  $J = 6.6, 2.1$  Hz, 4H), 6.20 (td,  $J = 56.5, 4.6$  Hz, 1H), 4.11 (td,  $J = 16.2, 4.5$  Hz, 1H), 3.14 – 3.09 (m, 4H), 2.94 (s, 6H), 2.73 (t,  $J = 6.5$  Hz, 4H), 2.02 – 1.86 (m, 4H);  $^{19}\text{F}$  NMR (376 MHz,  $\text{CDCl}_3$ )  $\delta$   $^{19}\text{F}$  NMR (377 MHz,  $\text{CDCl}_3$ )  $\delta$  -117.15 (ddd,  $J = 73.2, 56.5, 16.2$  Hz, 1F), -118.22 (ddd,  $J = 72.1, 56.5, 16.2$  Hz, 1F);  $^{13}\text{C}$  NMR (100 MHz,  $\text{CDCl}_3$ )  $\delta$  149.6, 142.0, 129.6, 127.3, 125.7 (t,  $^3J_{\text{C-F}} = 3.5$  Hz), 124.6 (t,  $^3J_{\text{C-F}} = 3.7$  Hz), 121.5, 117.6 (t,  $^1J_{\text{C-F}} = 243.9$  Hz), 112.6, 53.4 (t,  $^2J_{\text{C-F}} = 20.3$  Hz), 49.9, 40.6, 27.7, 22.0; HRMS (ESI)  $m/z$ :  $[\text{M}+\text{H}]^+$  Calcd for  $\text{C}_{22}\text{H}_{27}\text{F}_2\text{N}_2$ : 357.2137, Found: 357.2131.

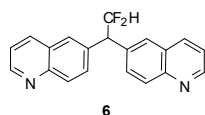

**6,6'-(2,2-difluoroethane-1,1-diyl)diquinoline (6):** The crude products were purified by column chromatography with petroleum ether/ethyl acetate (5/1, v/v) as eluent to give compound **6** (white solid, 57.2 mg, 0.18 mmol, 89% yield). M.p.: 67–69 °C;  $^1\text{H}$  NMR (400 MHz,  $\text{CDCl}_3$ )  $\delta$  8.90 (dd,  $J = 4.2, 1.7$  Hz, 2H), 8.13 (dd,  $J = 8.3, 0.8$  Hz, 2H), 8.08 (d,  $J = 8.8$  Hz, 2H), 7.81 (d,  $J = 1.6$  Hz, 2H), 7.64 (dd,  $J = 8.8, 2.0$  Hz, 2H), 7.40 (dd,  $J = 8.3, 4.2$  Hz, 2H), 6.52 (td,  $J = 55.4, 4.0$  Hz, 1H), 4.81 (td,  $J = 15.8, 3.9$  Hz, 1H);  $^{19}\text{F}$  NMR (376 MHz,  $\text{CDCl}_3$ )  $\delta$  -117.97 (dd,  $J = 55.5, 15.8$  Hz, 2F);  $^{13}\text{C}$  NMR (100 MHz,  $\text{CDCl}_3$ )  $\delta$  150.7, 147.4, 136.3, 134.9 (t,  $^3J_{\text{C-F}} = 3.2$  Hz), 130.8, 130.0, 128.2, 127.9, 121.6, 116.5 (t,  $^1J_{\text{C-F}} = 245.0$  Hz), 54.7 (t,  $^2J_{\text{C-F}} = 21.0$  Hz); HRMS (ESI)  $m/z$ :  $[\text{M}+\text{H}]^+$  Calcd for  $\text{C}_{20}\text{H}_{15}\text{F}_2\text{N}_2$ : 321.1198, Found: 321.1191.

## 9. NMR spectra of the related compounds

$^1\text{H}$  NMR (400 MHz,  $\text{CDCl}_3$ ) of **3a**

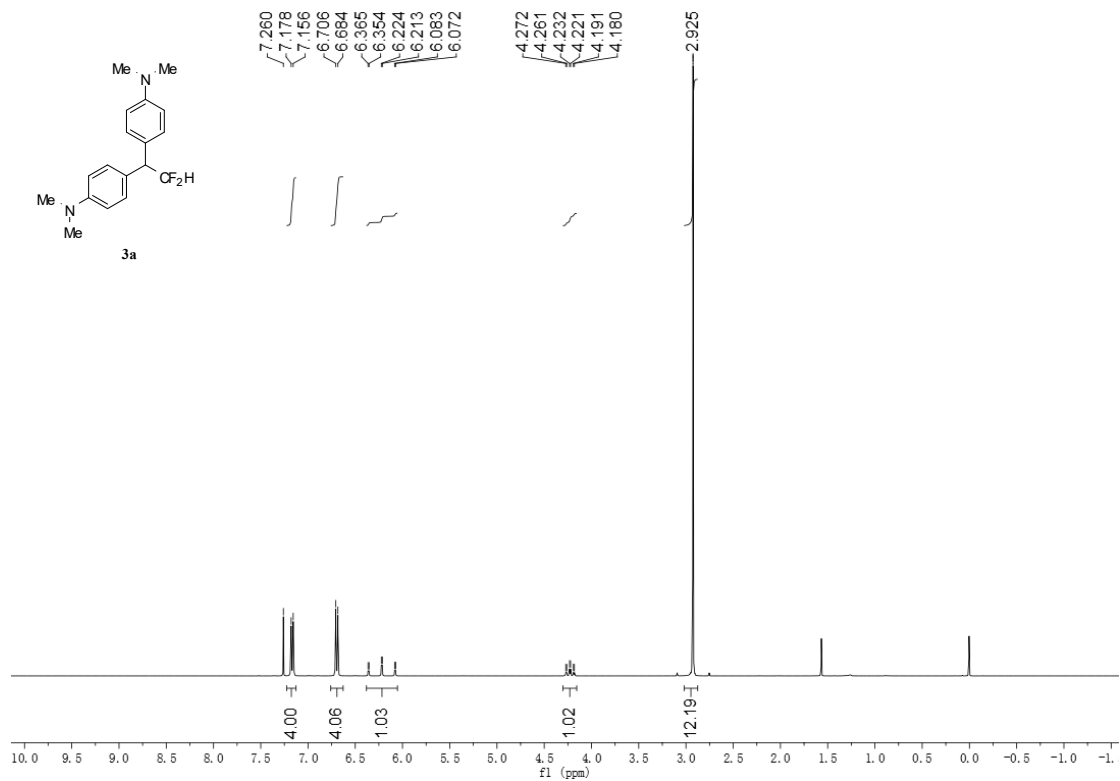

$^{19}\text{F}$  NMR (376 MHz,  $\text{CDCl}_3$ ) of **3a**

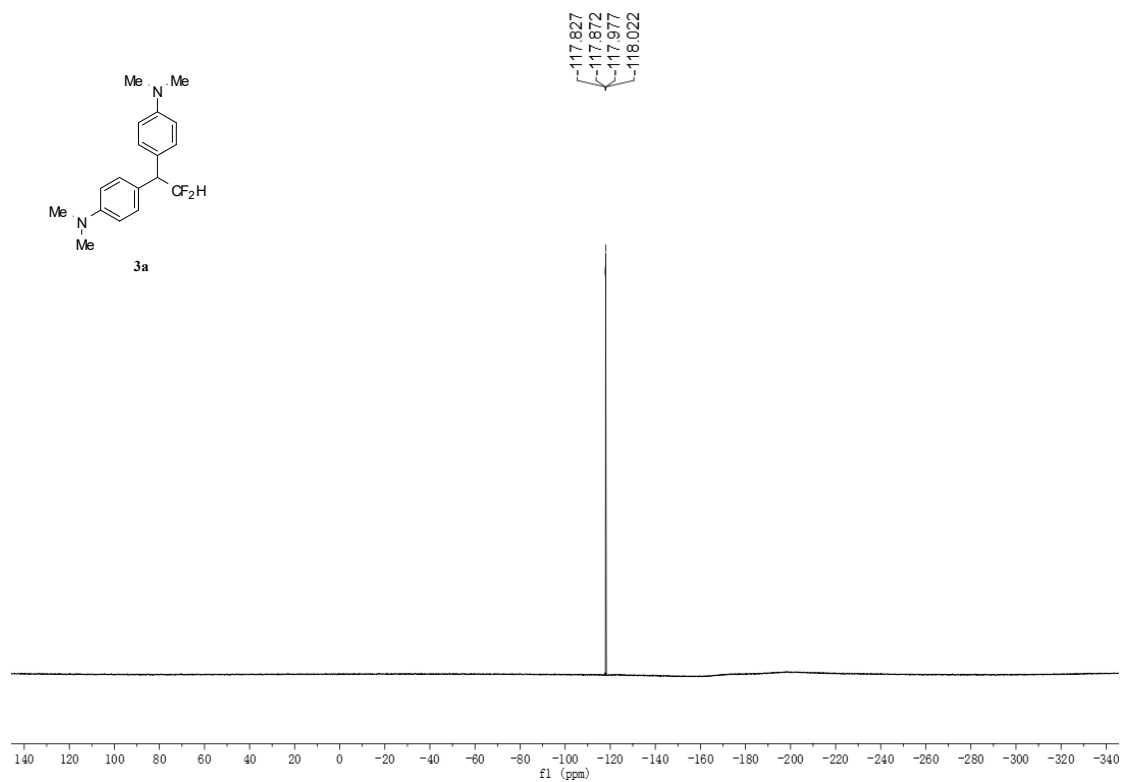



$^{13}\text{C}$  NMR (100 MHz,  $\text{CDCl}_3$ ) of **3a**

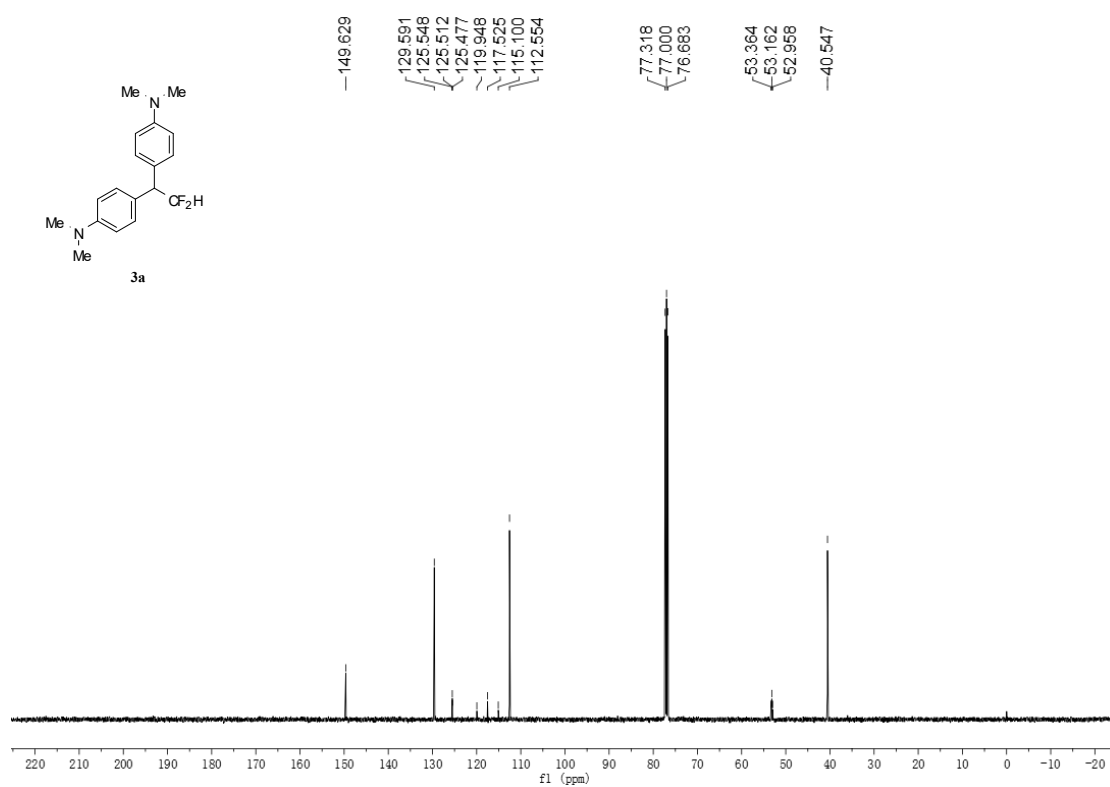

$^1\text{H}$  NMR (400 MHz,  $\text{CDCl}_3$ ) of **3b**

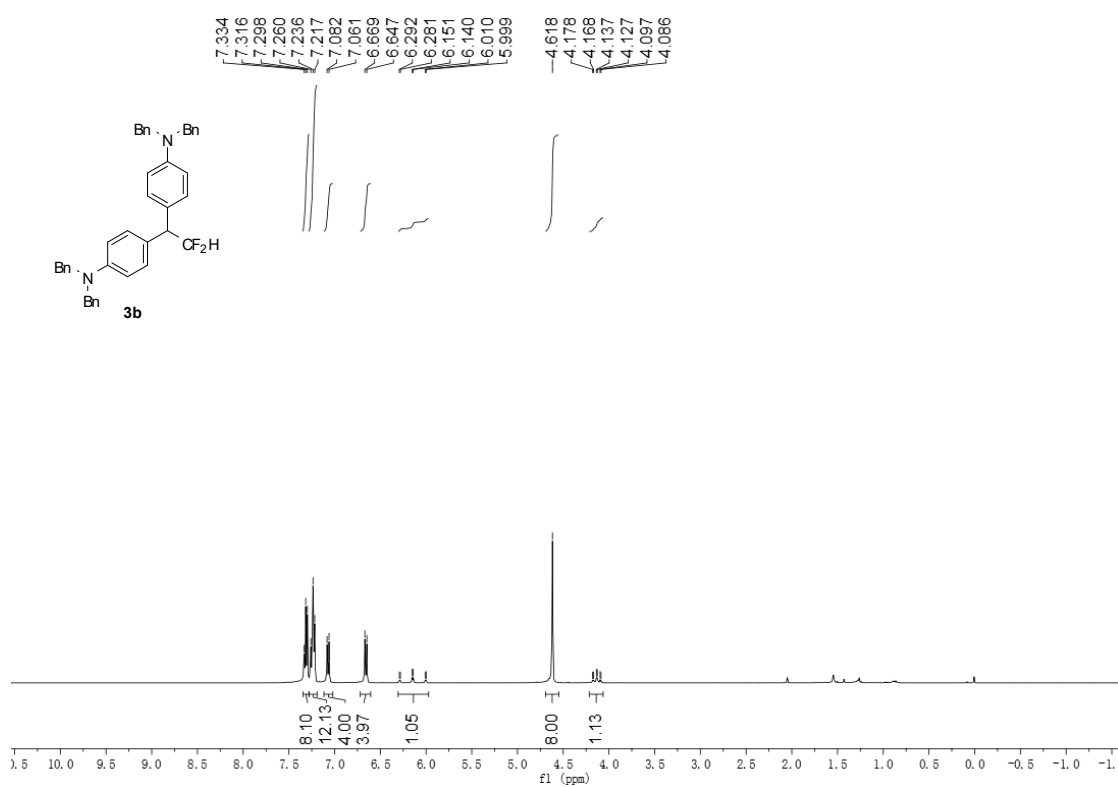

$^{19}\text{F}$  NMR (376 MHz,  $\text{CDCl}_3$ ) of **3b**

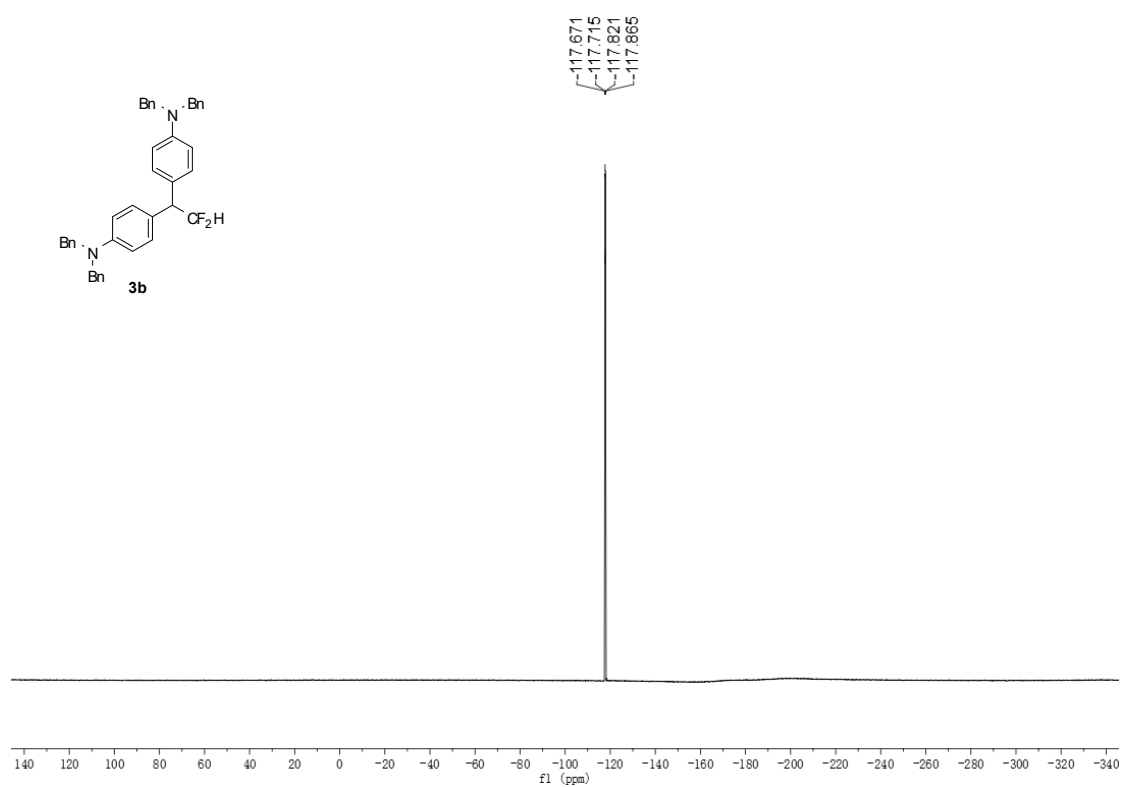

$^{13}\text{C}$  NMR (100 MHz,  $\text{CDCl}_3$ ) of **3b**

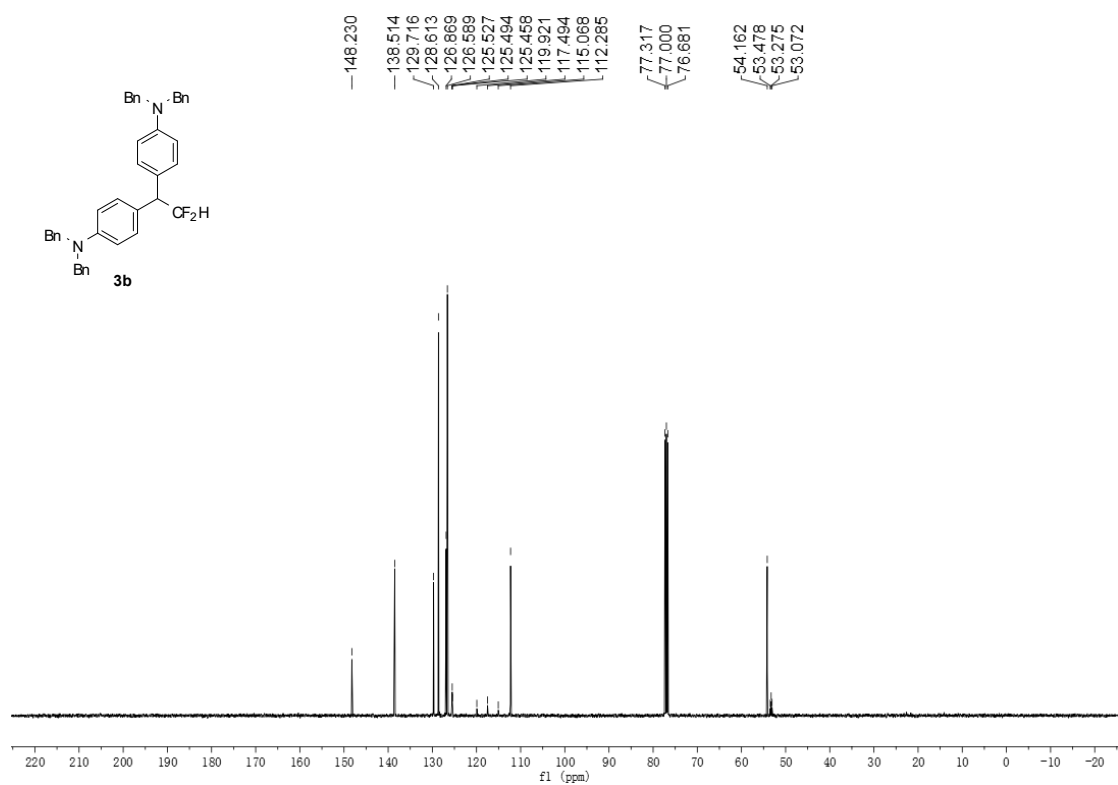

$^1\text{H}$  NMR (400 MHz,  $\text{CDCl}_3$ ) of **3c**

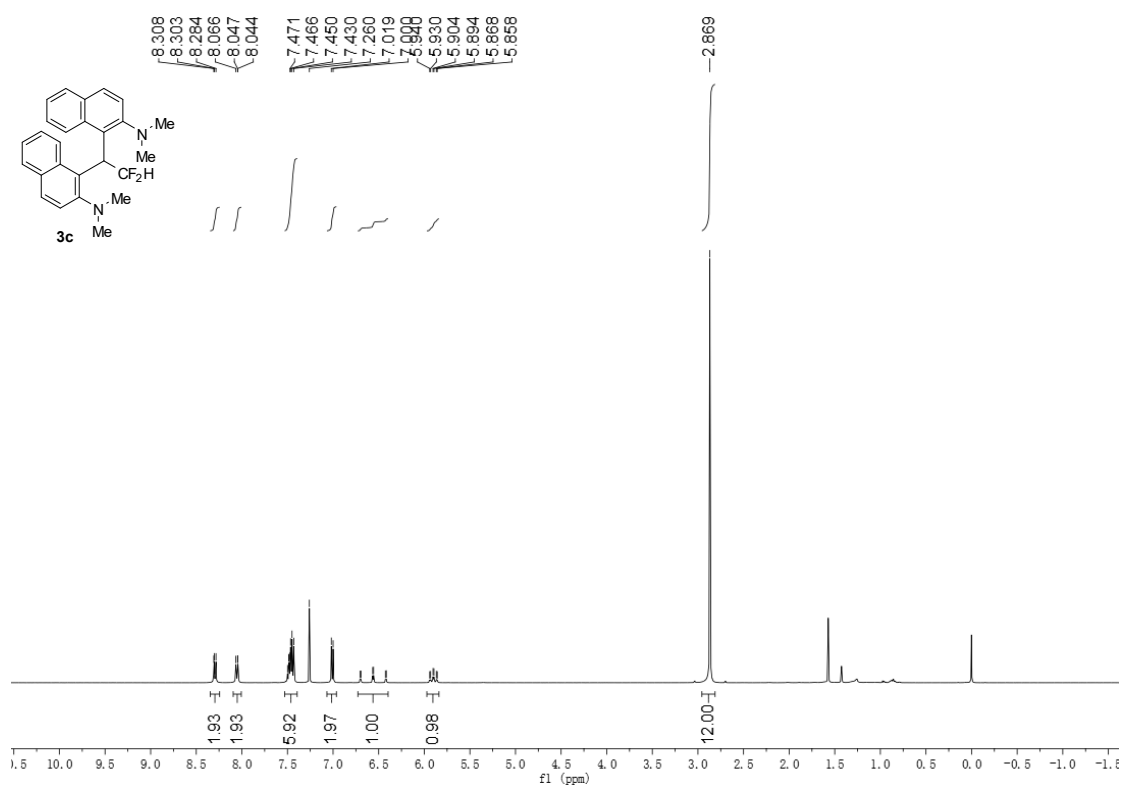

$^{19}\text{F}$  NMR (376 MHz,  $(\text{CD}_3)_2\text{CO}$ ) of **3c**

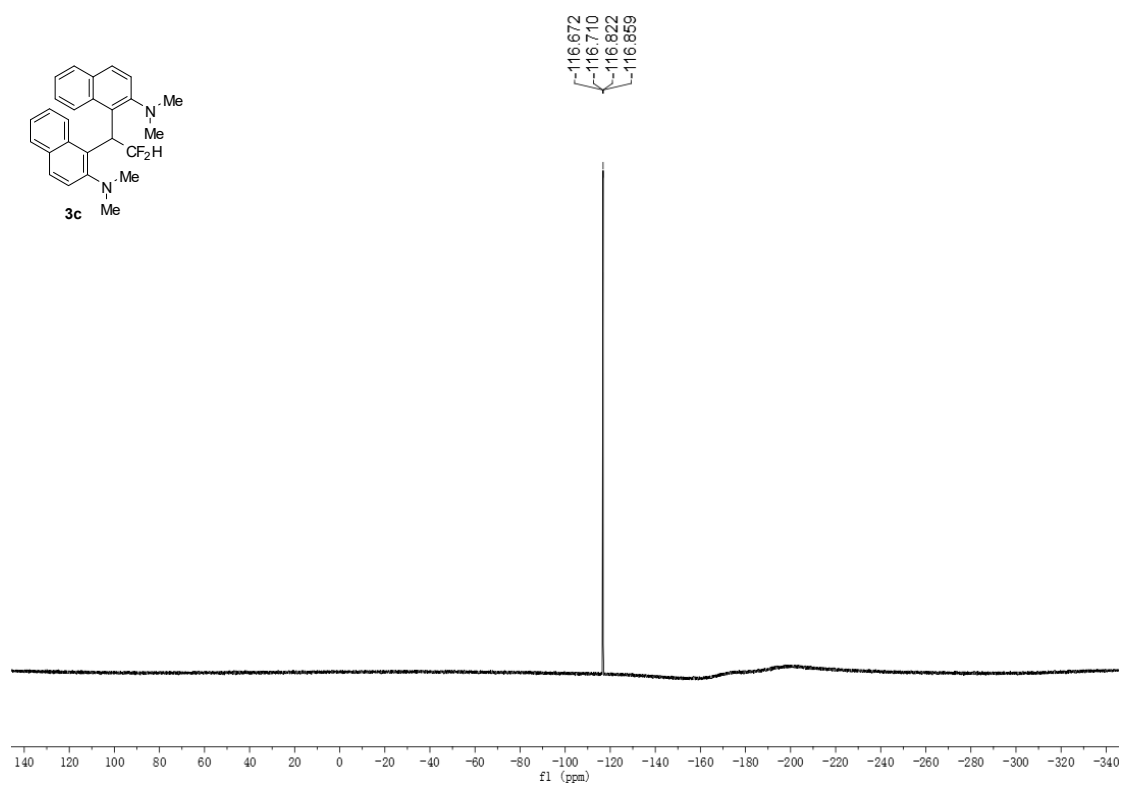

$^{13}\text{C}$  NMR (100 MHz,  $(\text{CD}_3)_2\text{CO}$ ) of **3c**

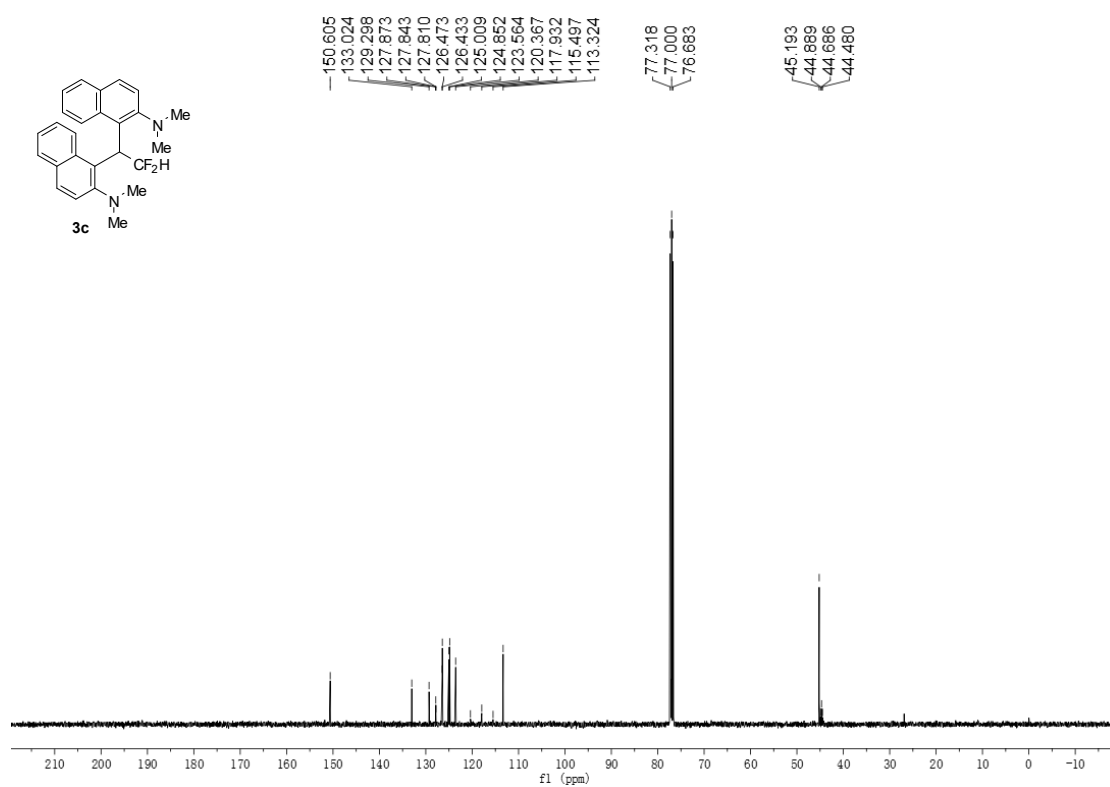

$^1\text{H}$  NMR (400 MHz,  $\text{CDCl}_3$ ) of **3d**

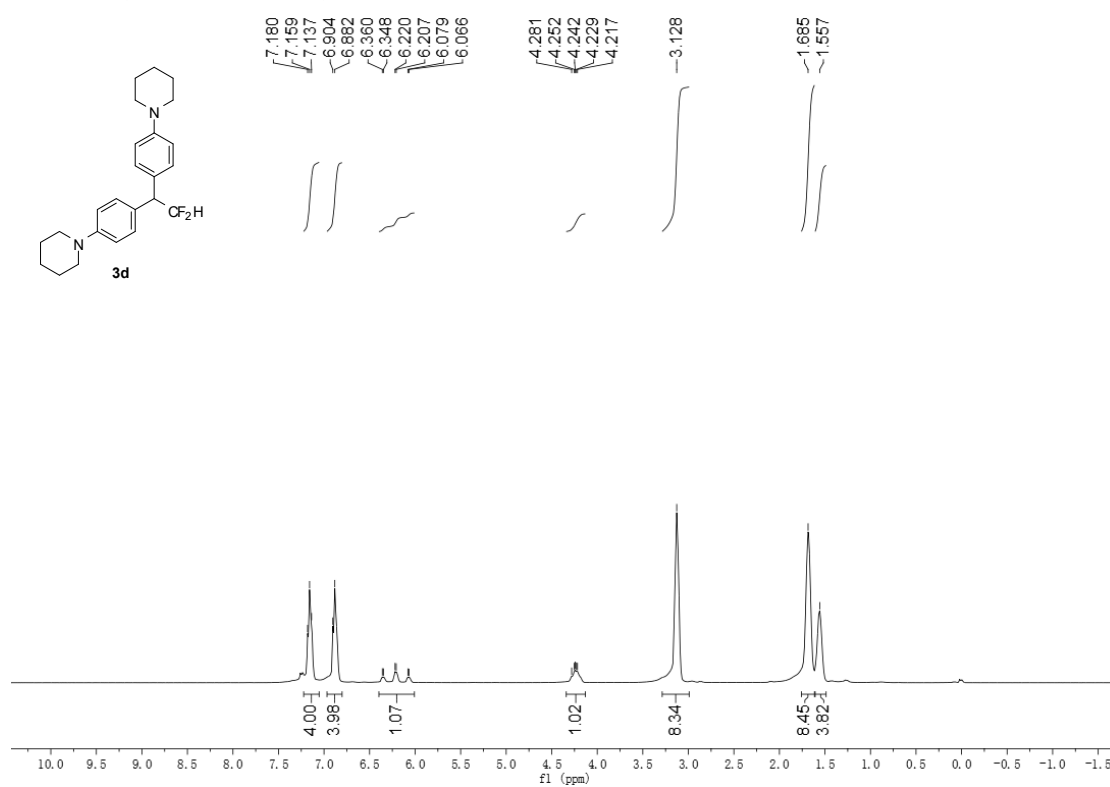

$^{19}\text{F}$  NMR (376 MHz,  $(\text{CD}_3)_2\text{CO}$ ) of **3d**

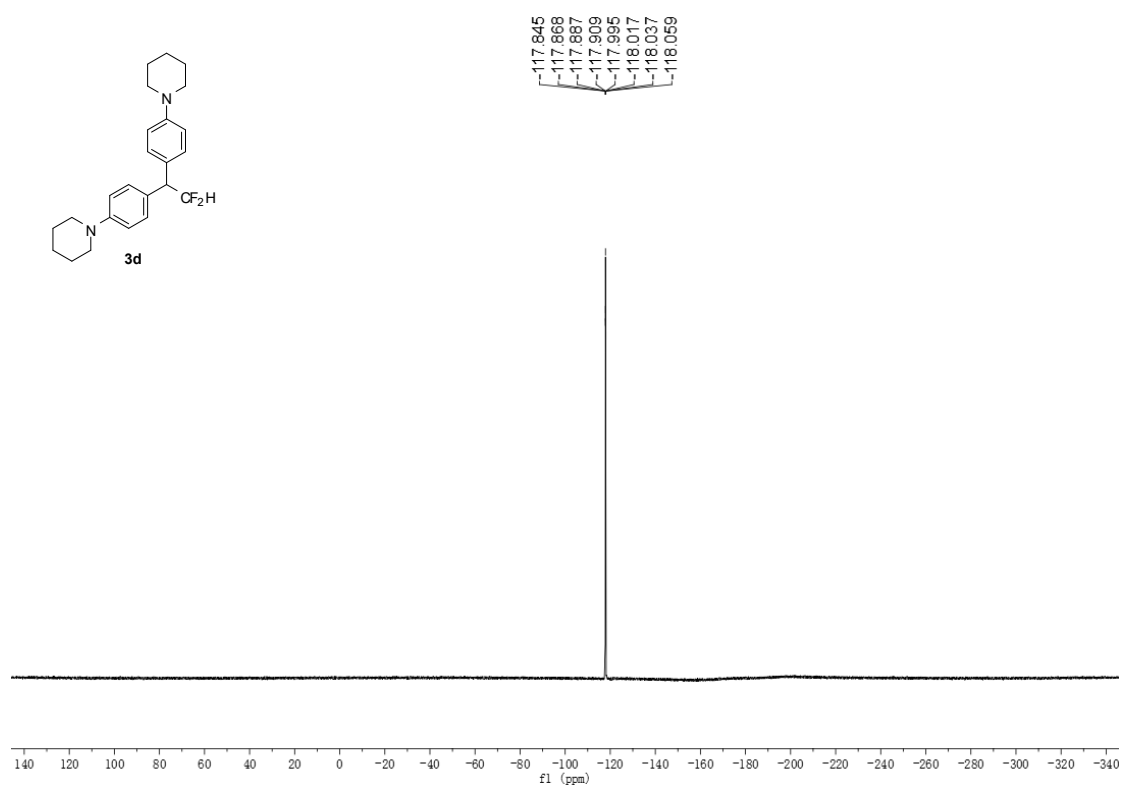

$^{13}\text{C}$  NMR (100 MHz,  $(\text{CD}_3)_2\text{CO}$ ) of **3d**

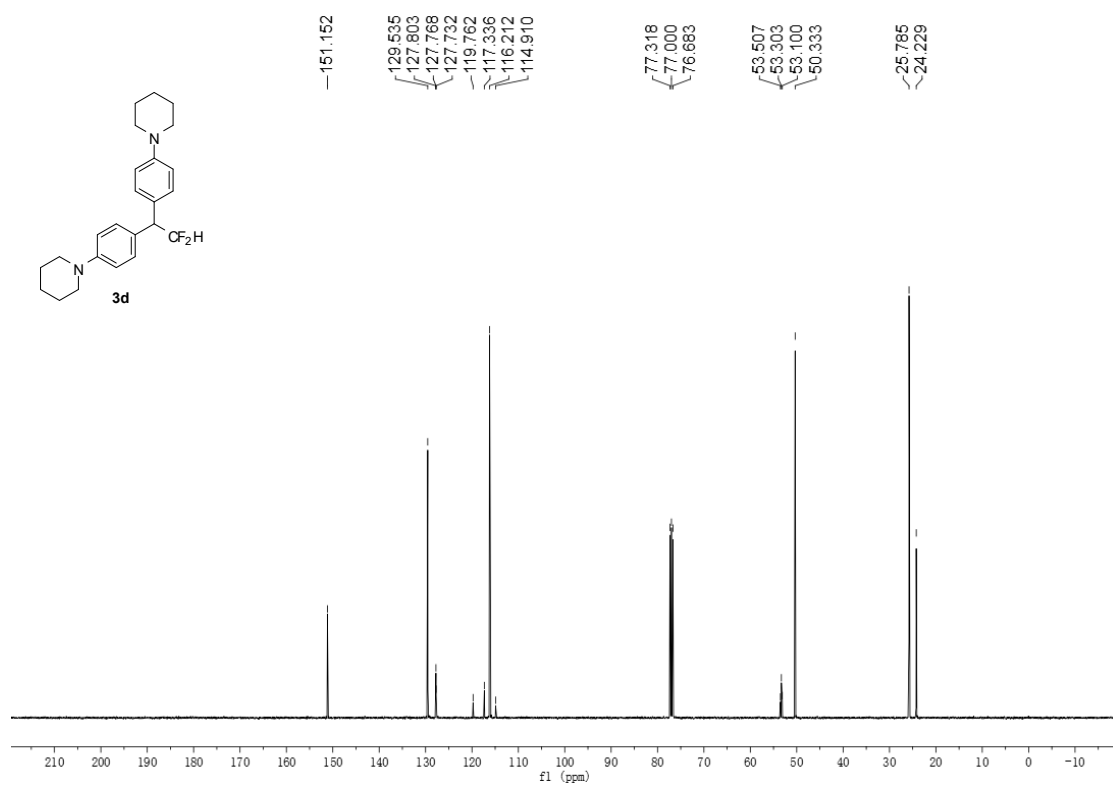

<sup>1</sup>H NMR (400 MHz, CDCl<sub>3</sub>) of **3e**

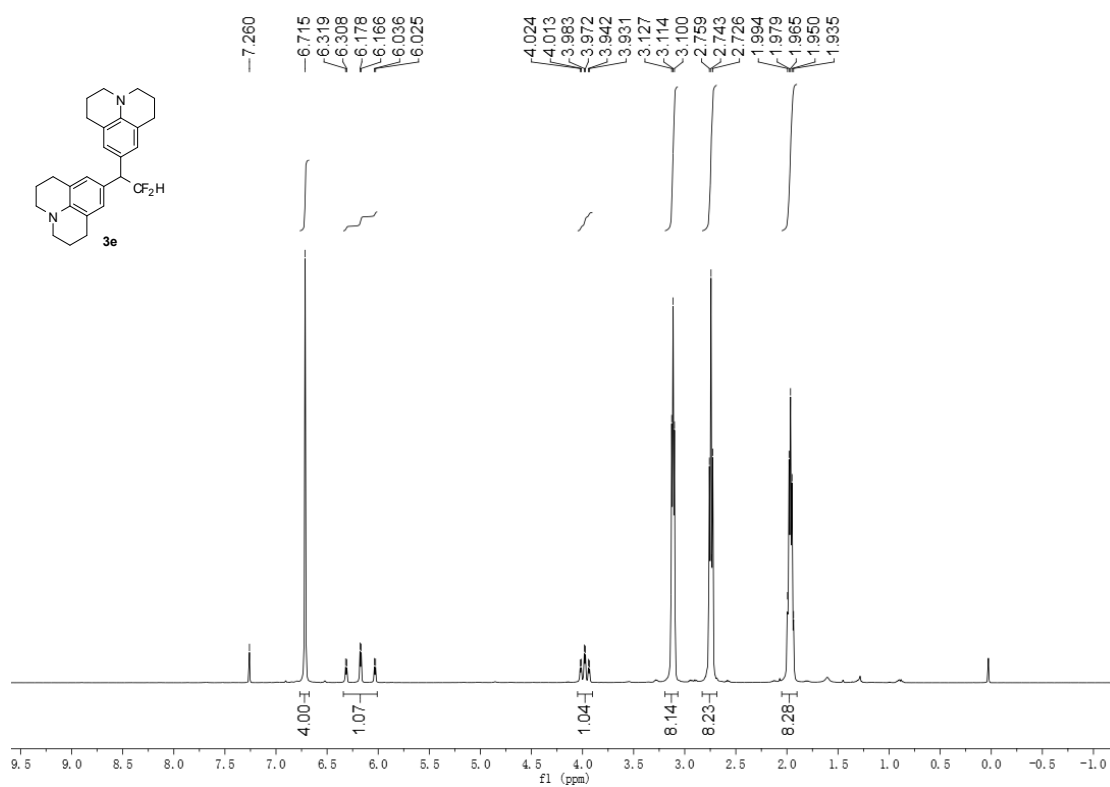

<sup>19</sup>F NMR (376 MHz, CDCl<sub>3</sub>) of **3e**

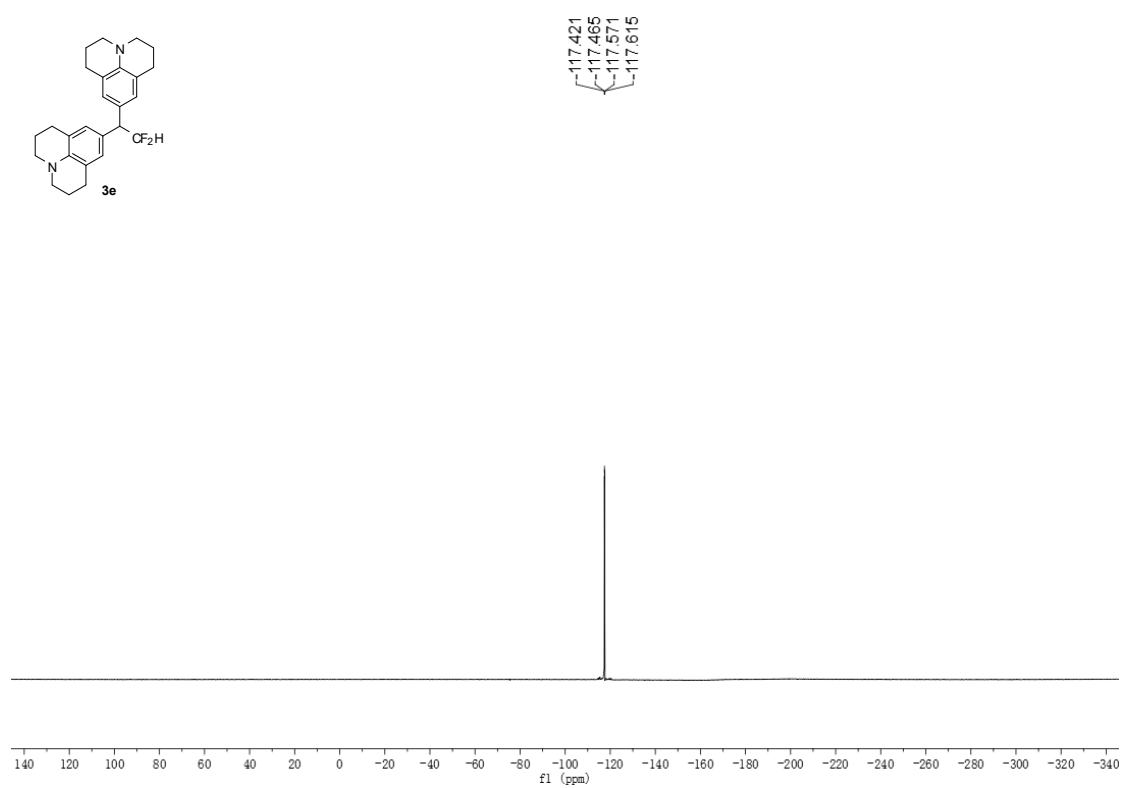



$^{19}\text{F}$  NMR (376 MHz,  $\text{CDCl}_3$ ) of **3f**

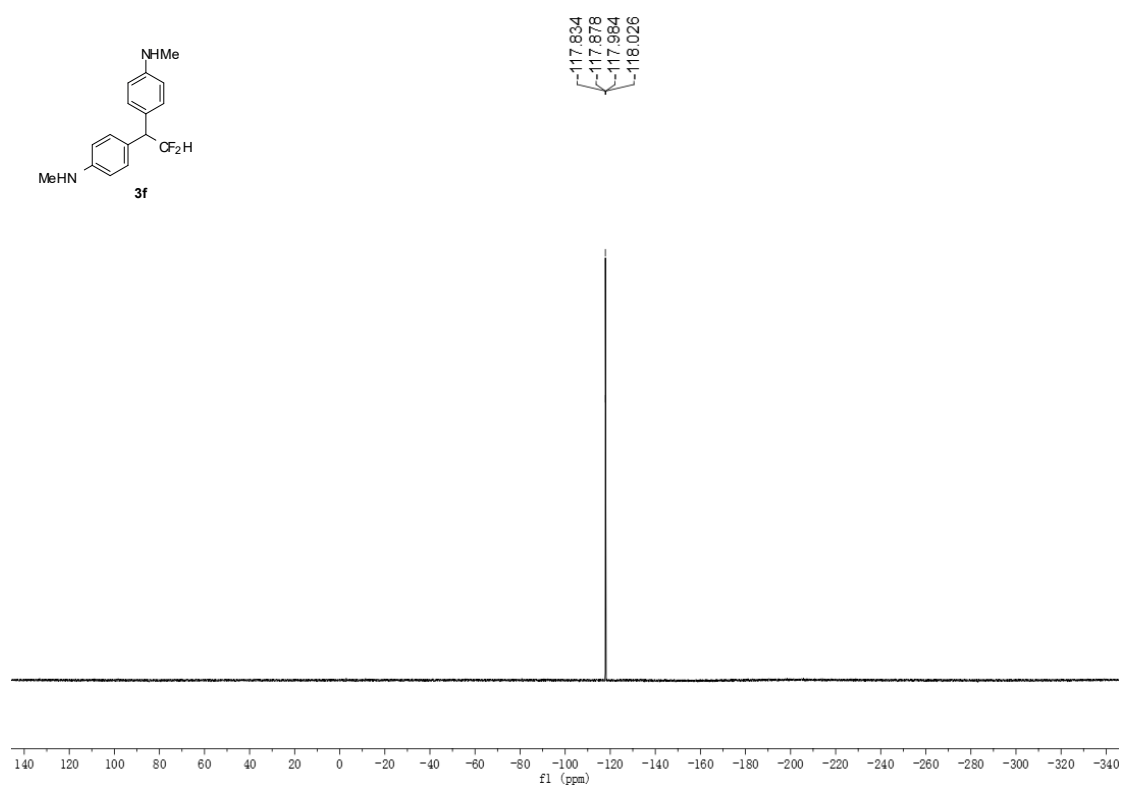

$^{13}\text{C}$  NMR (100 MHz,  $\text{CDCl}_3$ ) of **3f**

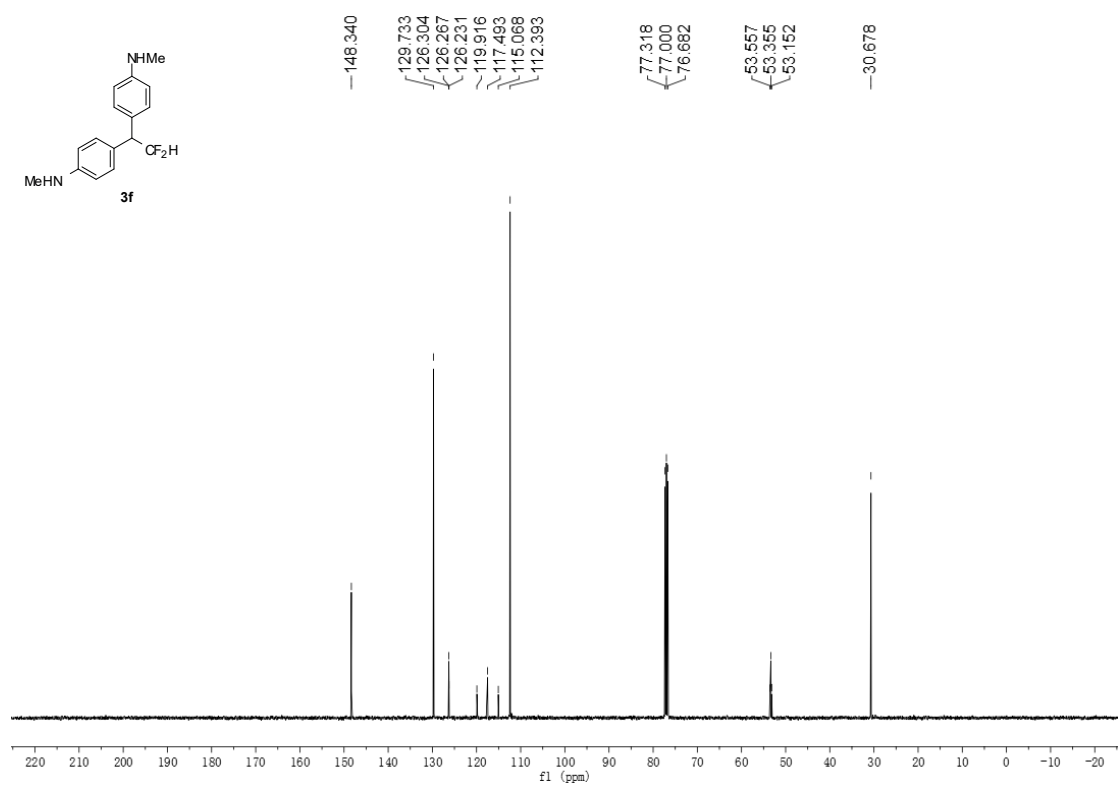



<sup>1</sup>H NMR (400 MHz, CDCl<sub>3</sub>) of **3g**

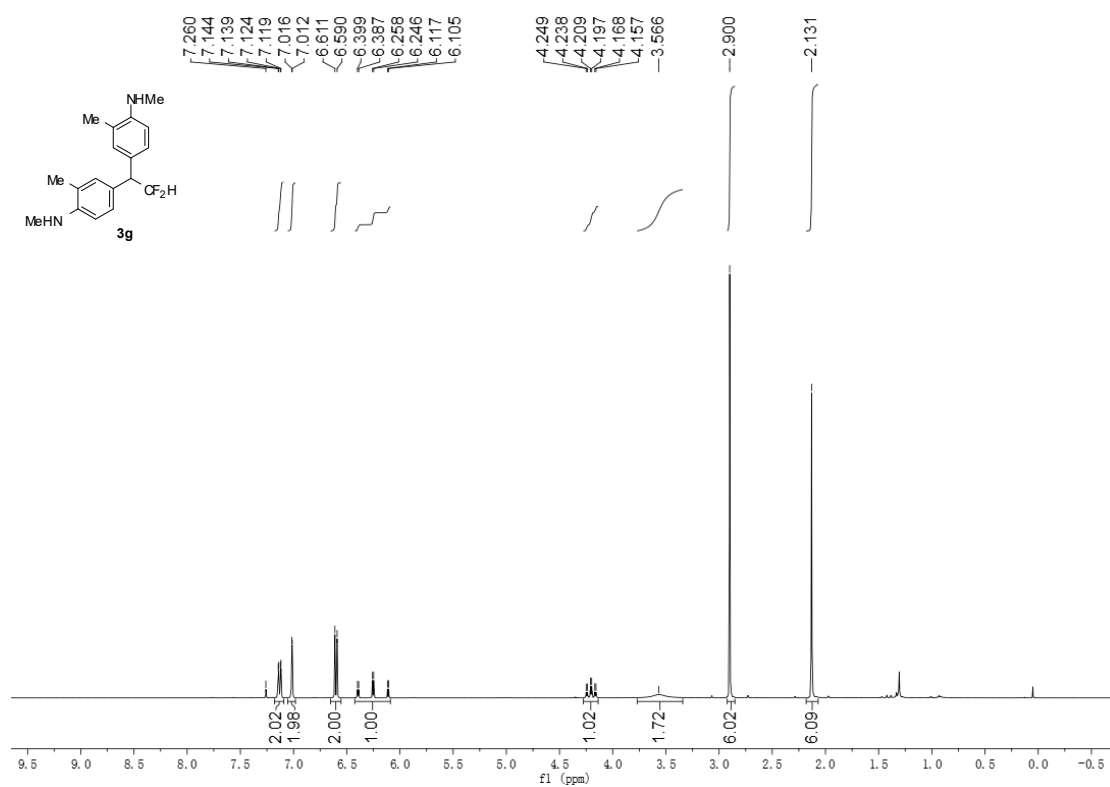

<sup>19</sup>F NMR (376 MHz, CDCl<sub>3</sub>) of **3g**

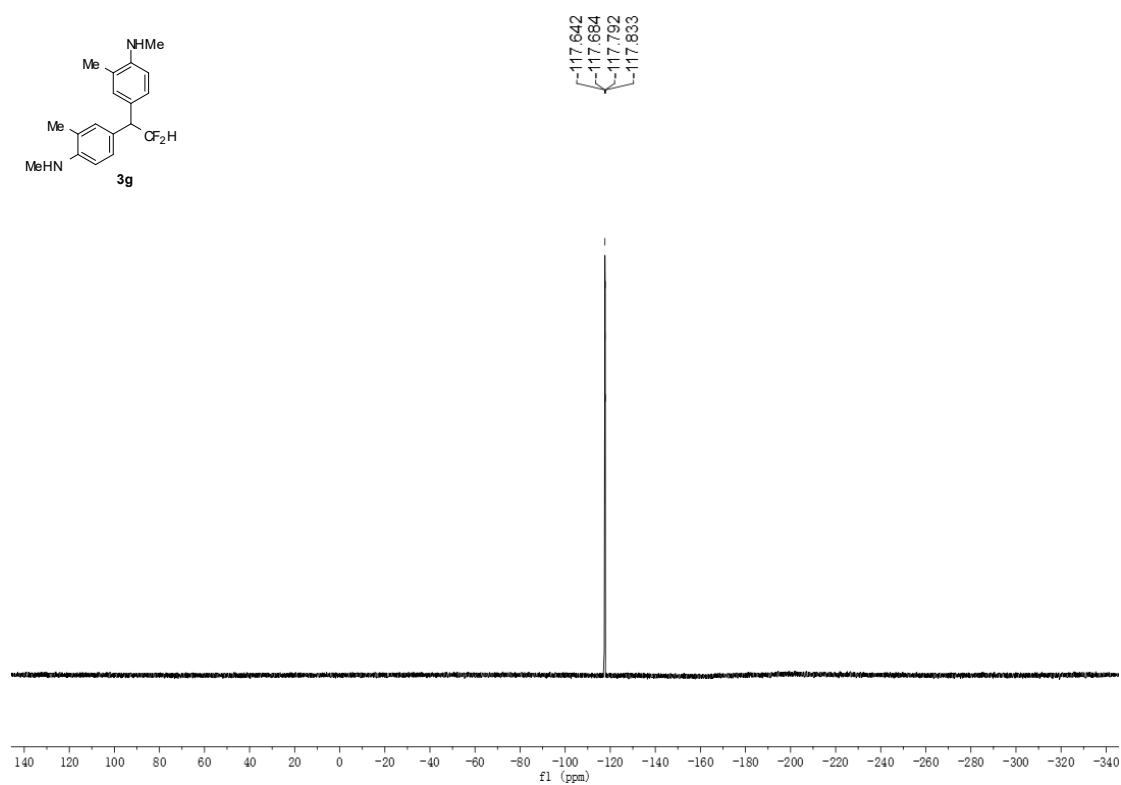

$^{13}\text{C}$  NMR (100 MHz,  $\text{CDCl}_3$ ) of **3g**

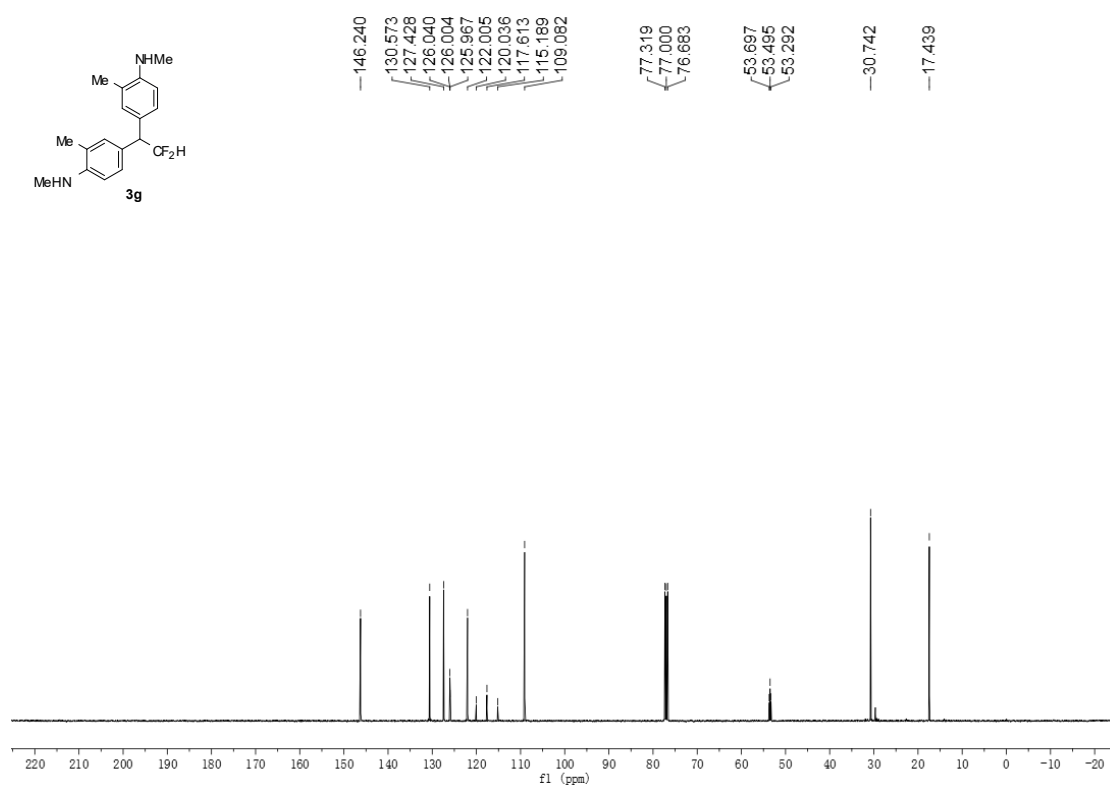

$^1\text{H}$  NMR (400 MHz,  $\text{CDCl}_3$ ) of **3h**

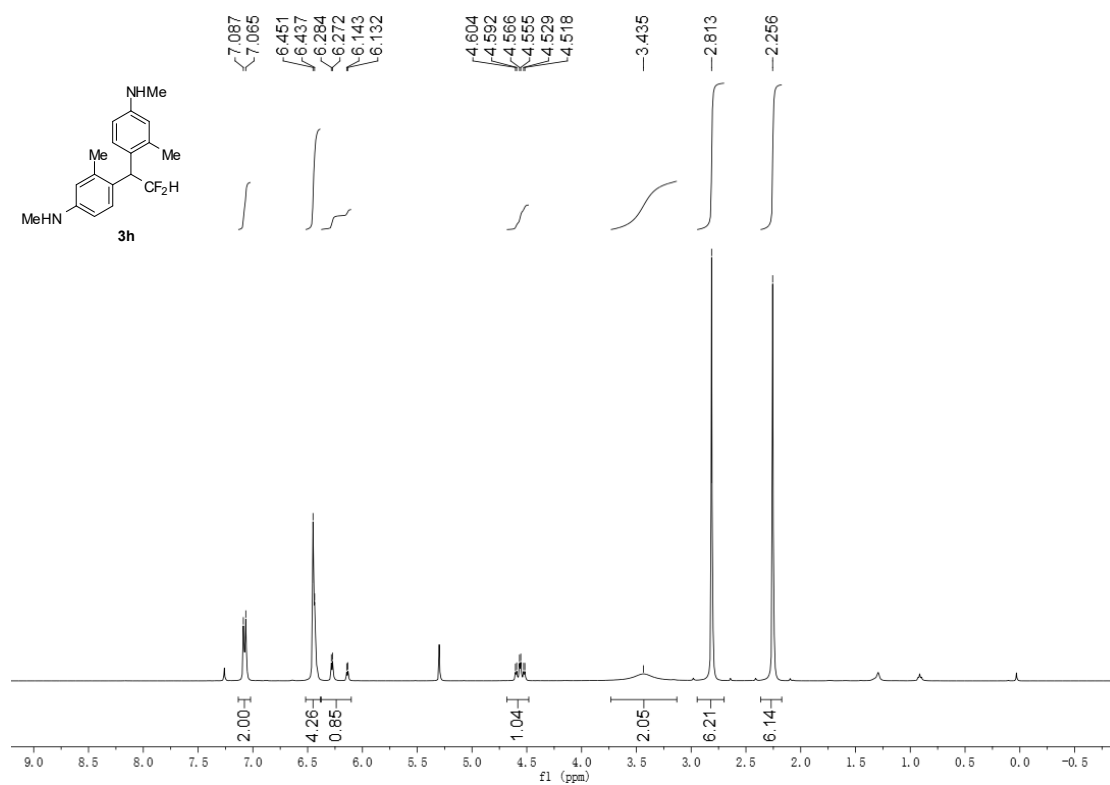

$^{19}\text{F}$  NMR (376 MHz,  $\text{CDCl}_3$ ) of **3h**

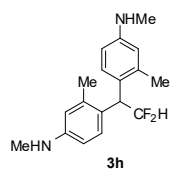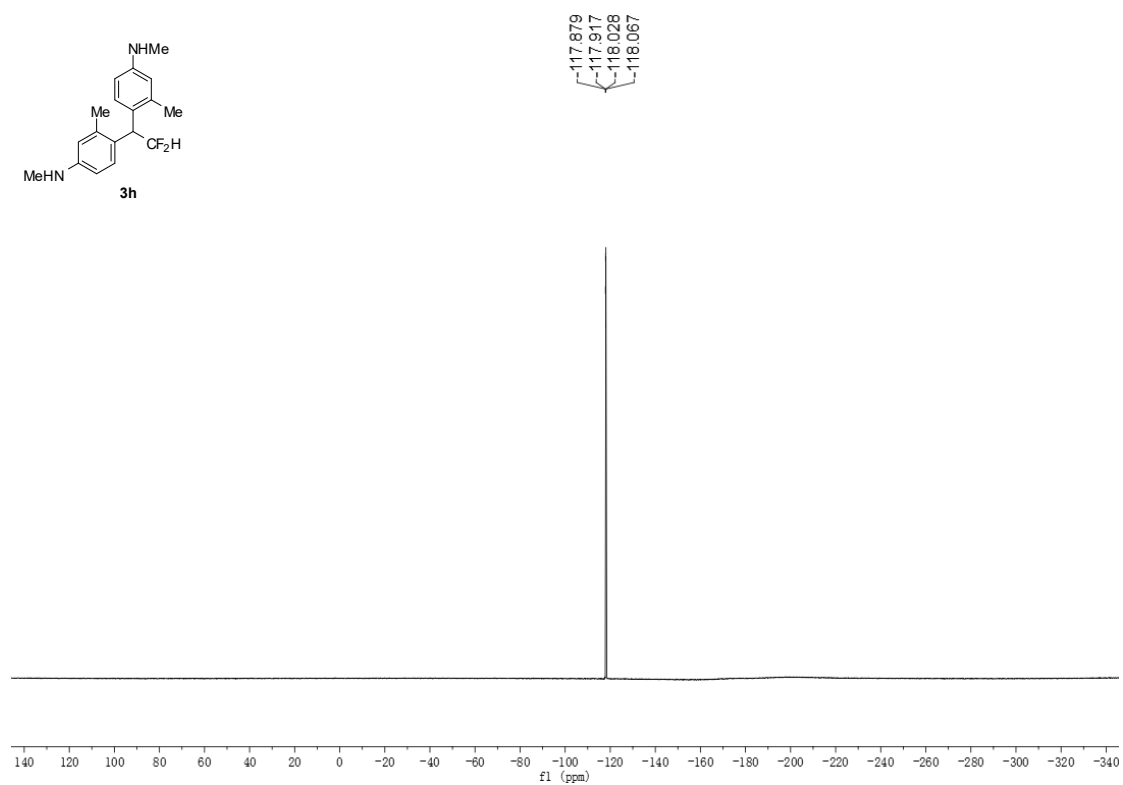

$^{13}\text{C}$  NMR (100 MHz,  $\text{CDCl}_3$ ) of **3h**

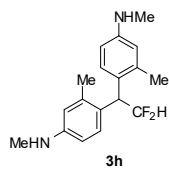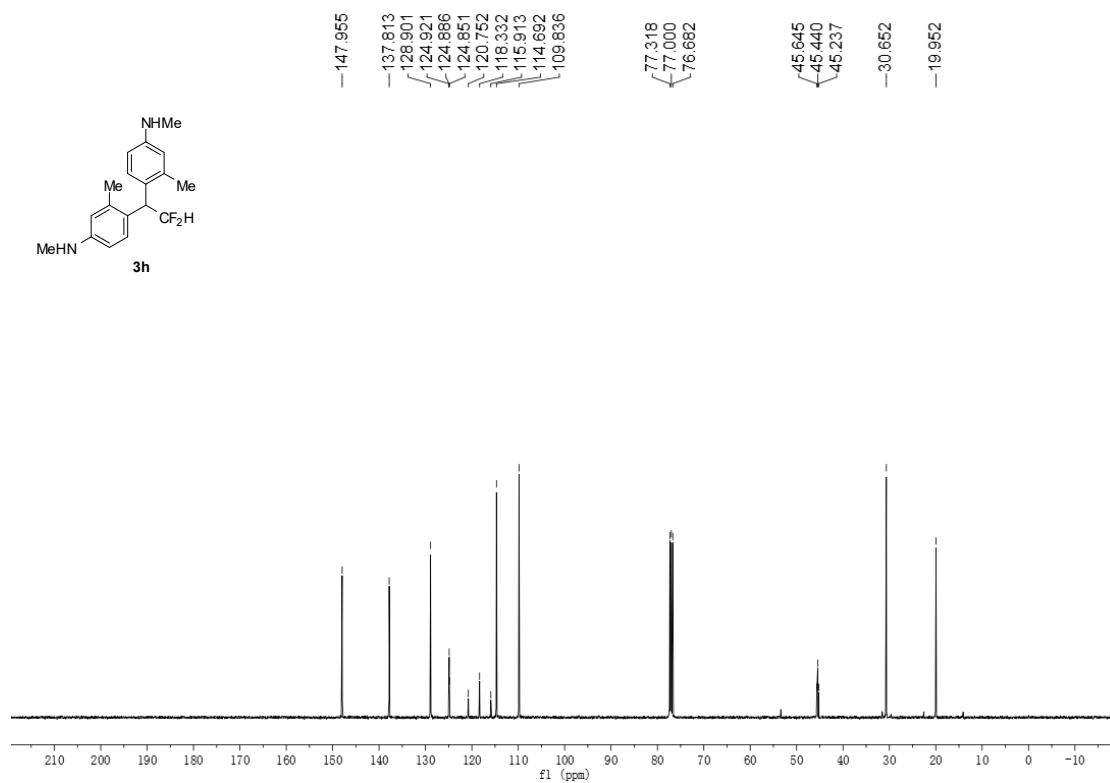

$^1\text{H}$  NMR (400 MHz,  $\text{CDCl}_3$ ) of **3i**

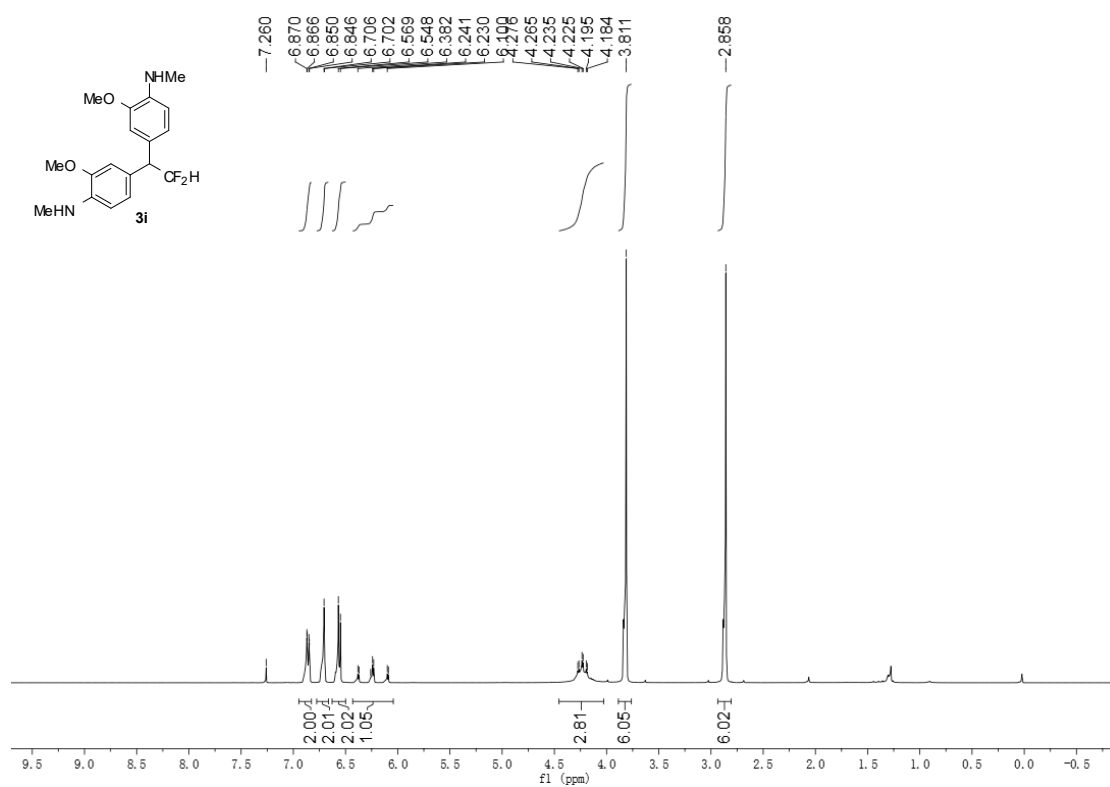

$^{19}\text{F}$  NMR (376 MHz,  $\text{CDCl}_3$ ) of **3i**

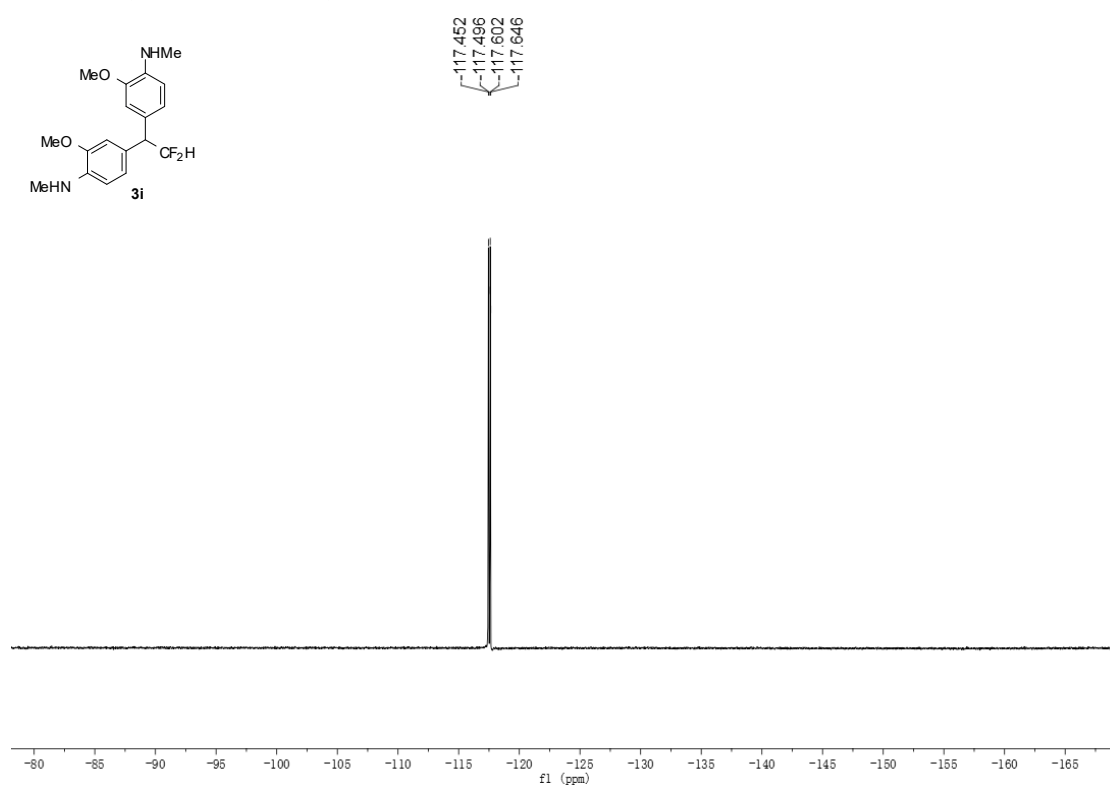

$^{13}\text{C}$  NMR (100 MHz,  $\text{CDCl}_3$ ) of **3i**

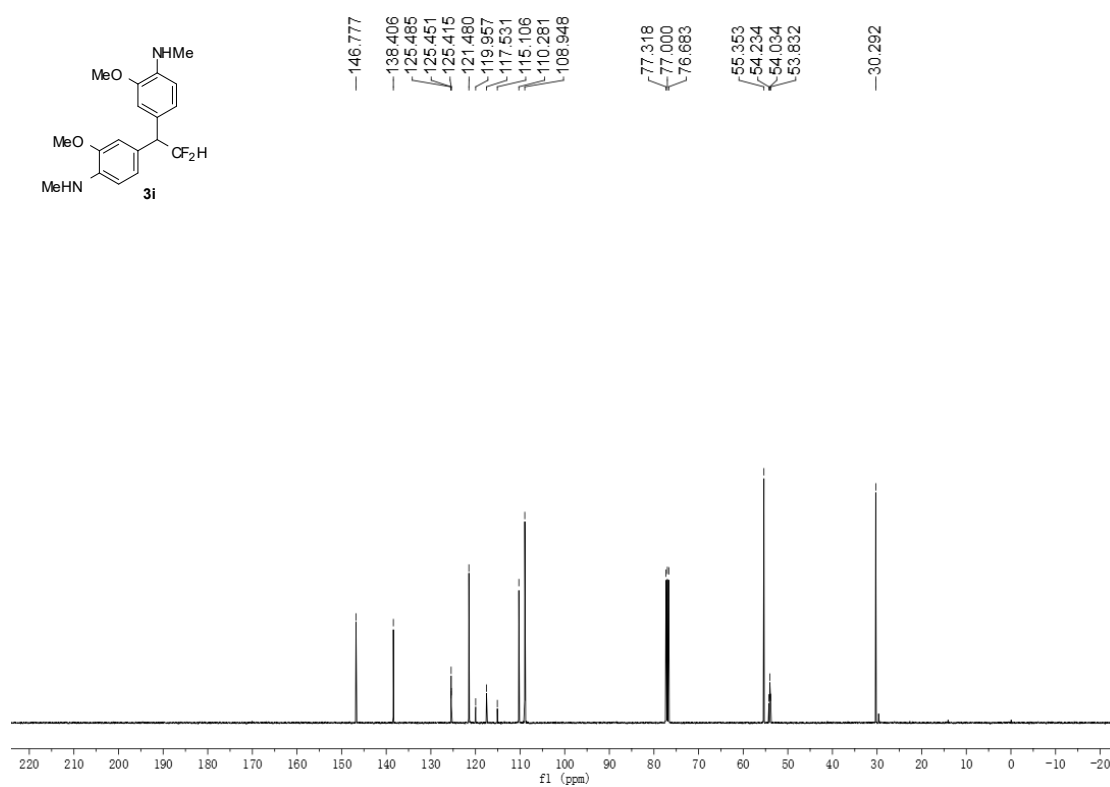

$^1\text{H}$  NMR (400 MHz,  $\text{CDCl}_3$ ) of **3j**

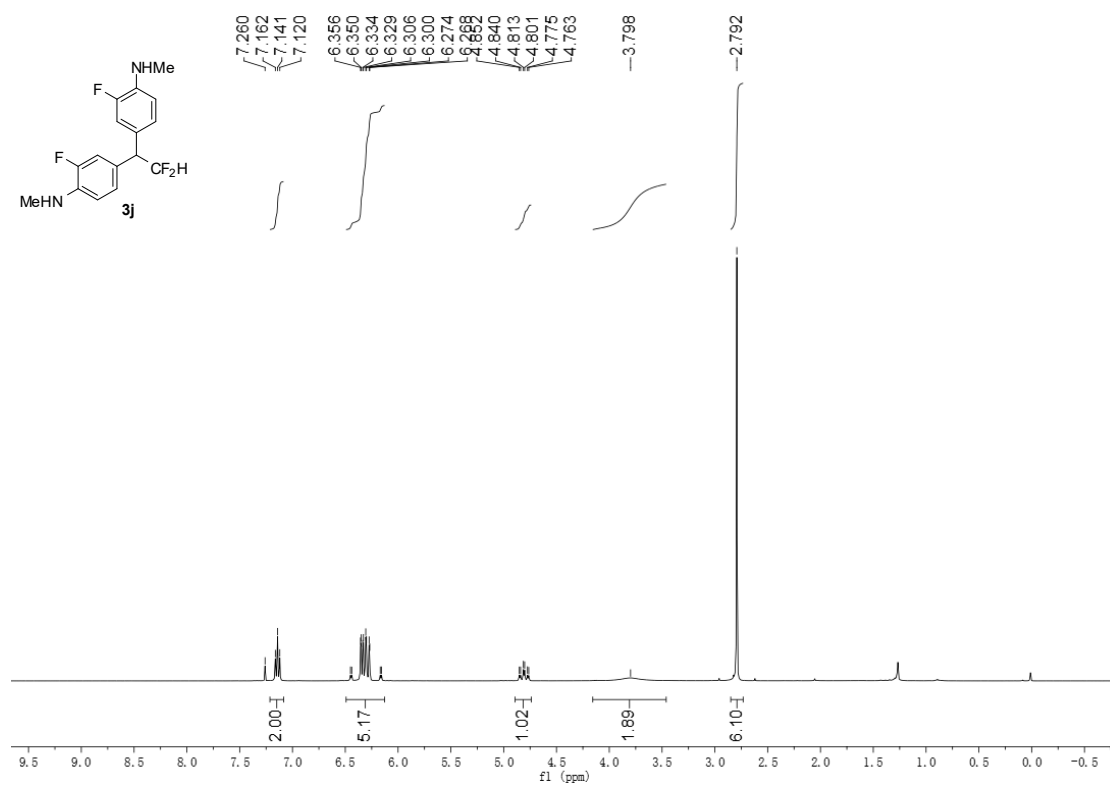

$^{19}\text{F}$  NMR (376 MHz,  $\text{CDCl}_3$ ) of **3j**

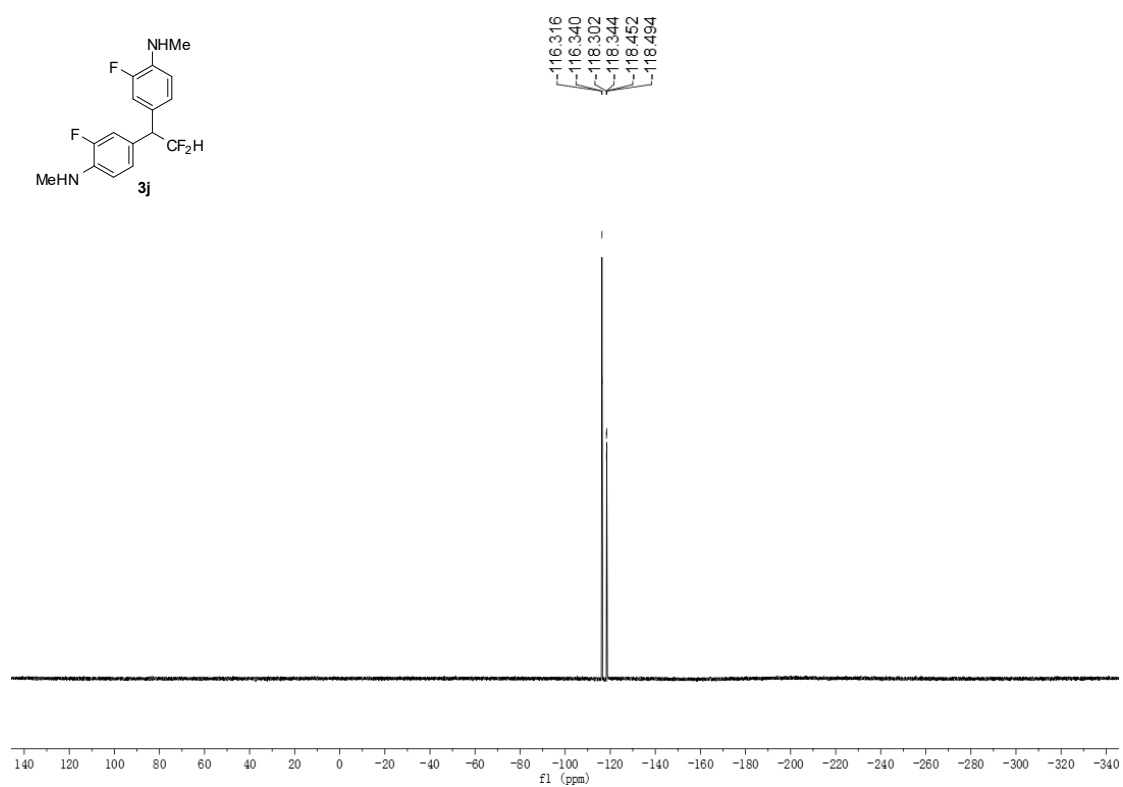

$^{13}\text{C}$  NMR (100 MHz,  $\text{CDCl}_3$ ) of **3j**

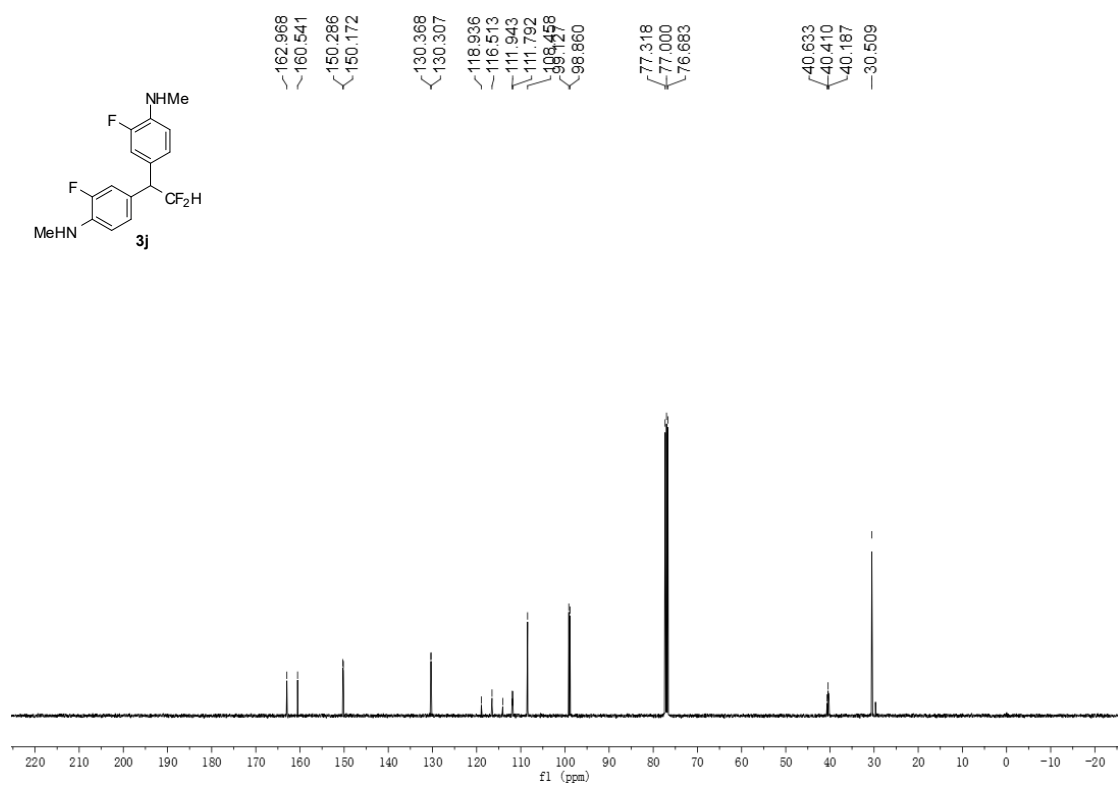

<sup>1</sup>H NMR (400 MHz, CDCl<sub>3</sub>) of **3k**

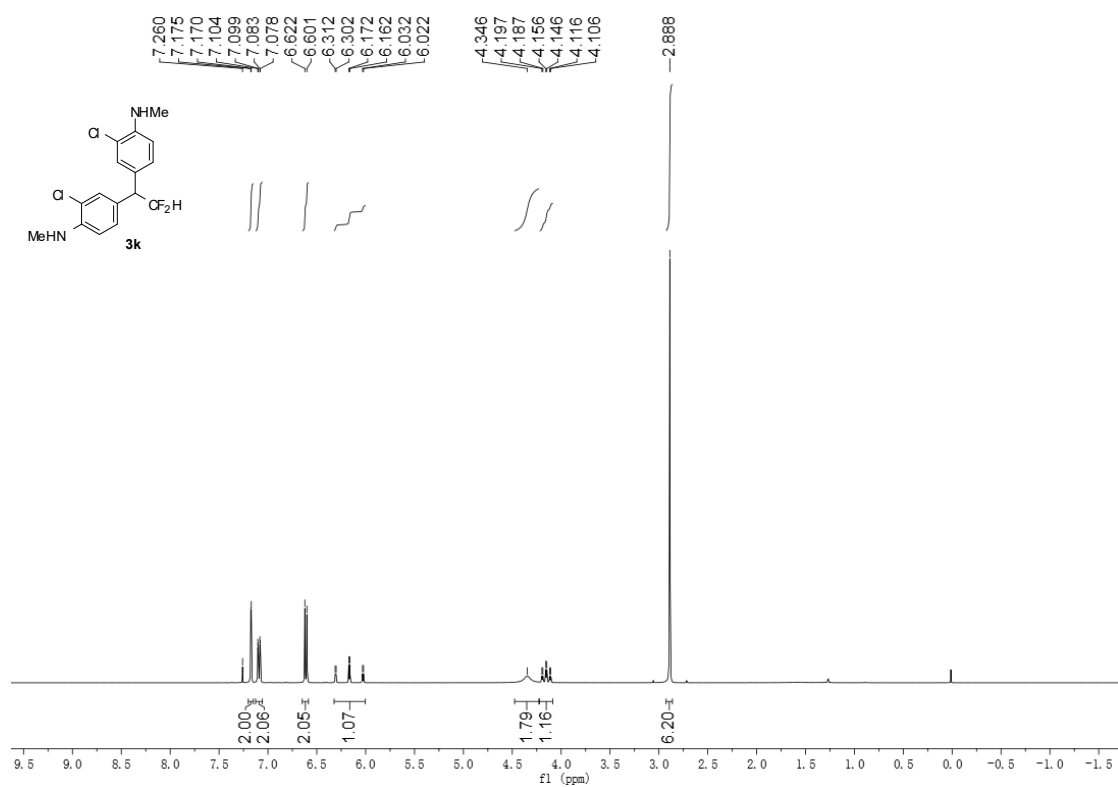

<sup>19</sup>F NMR (376 MHz, CDCl<sub>3</sub>) of **3k**

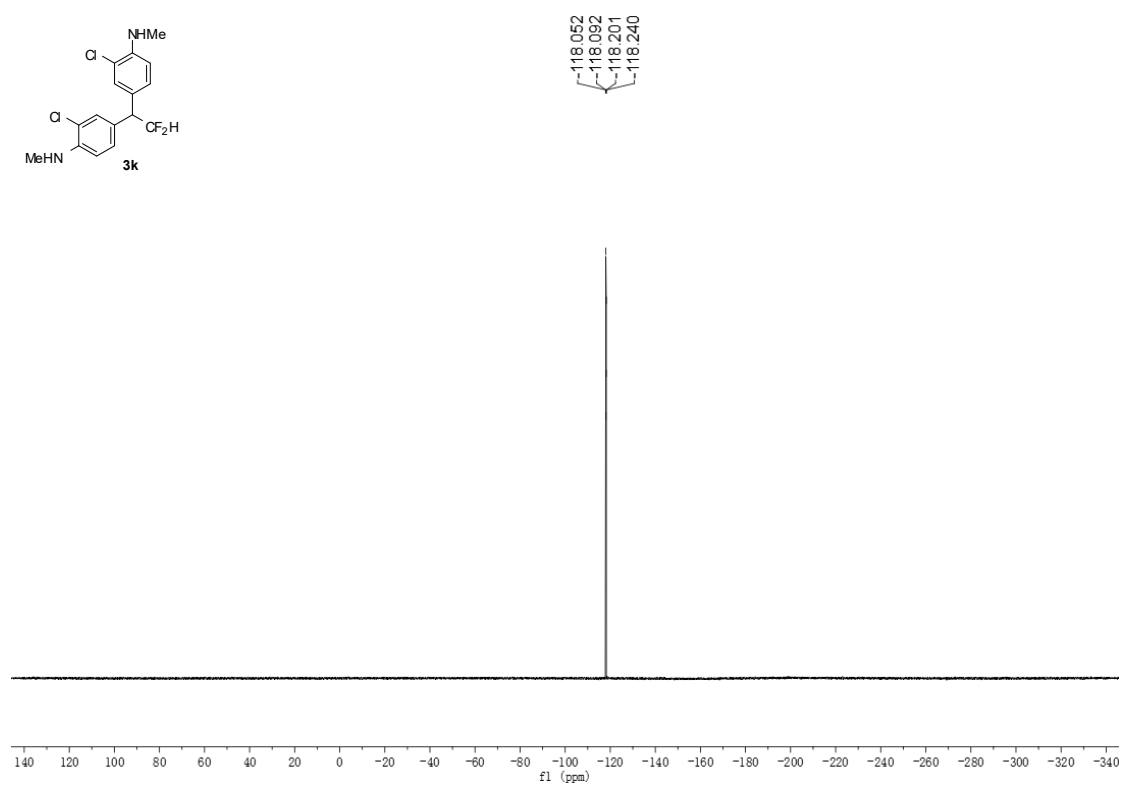

$^{13}\text{C}$  NMR (100 MHz,  $\text{CDCl}_3$ ) of **3k**

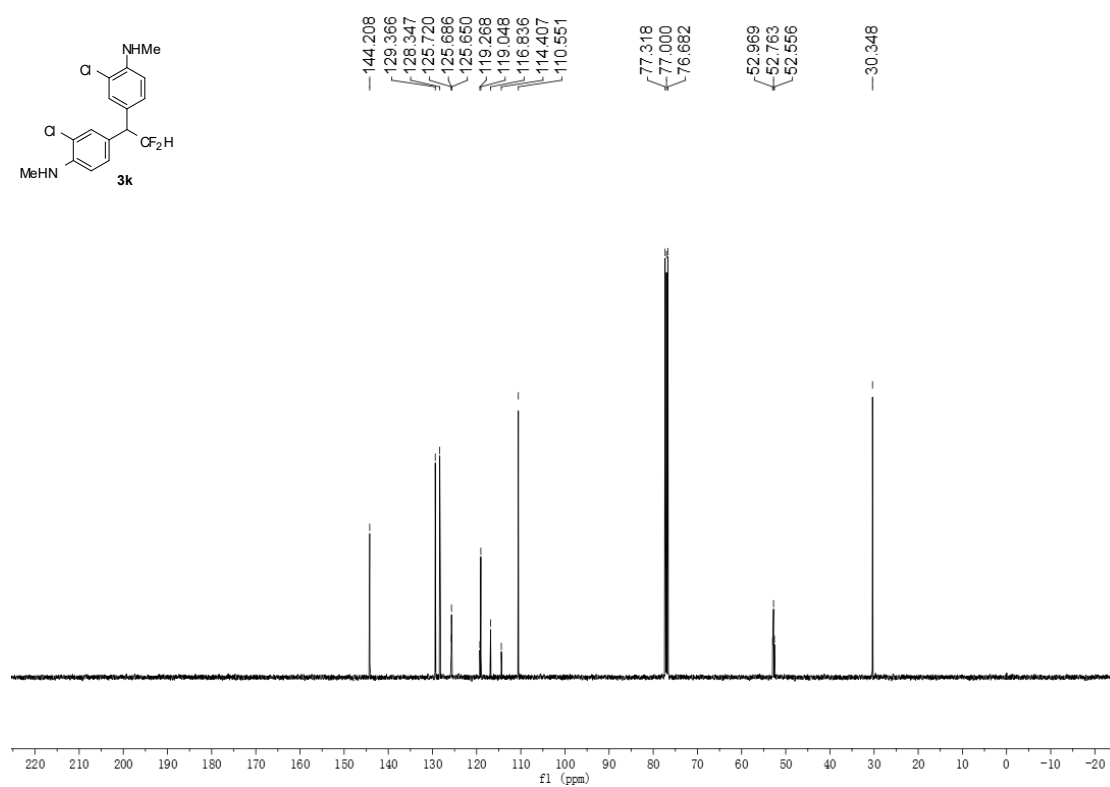

$^1\text{H}$  NMR (400 MHz,  $\text{CDCl}_3$ ) of **3l**

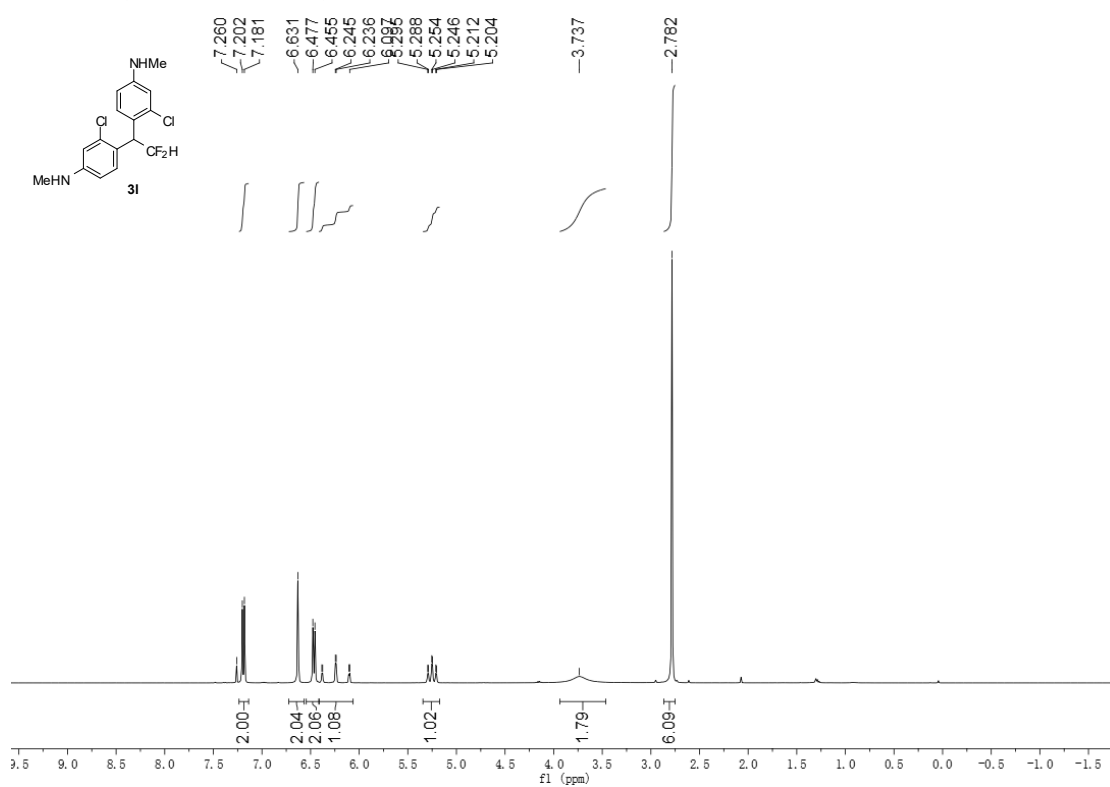



$^{19}\text{F}$  NMR (376 MHz,  $\text{CDCl}_3$ ) of **31**

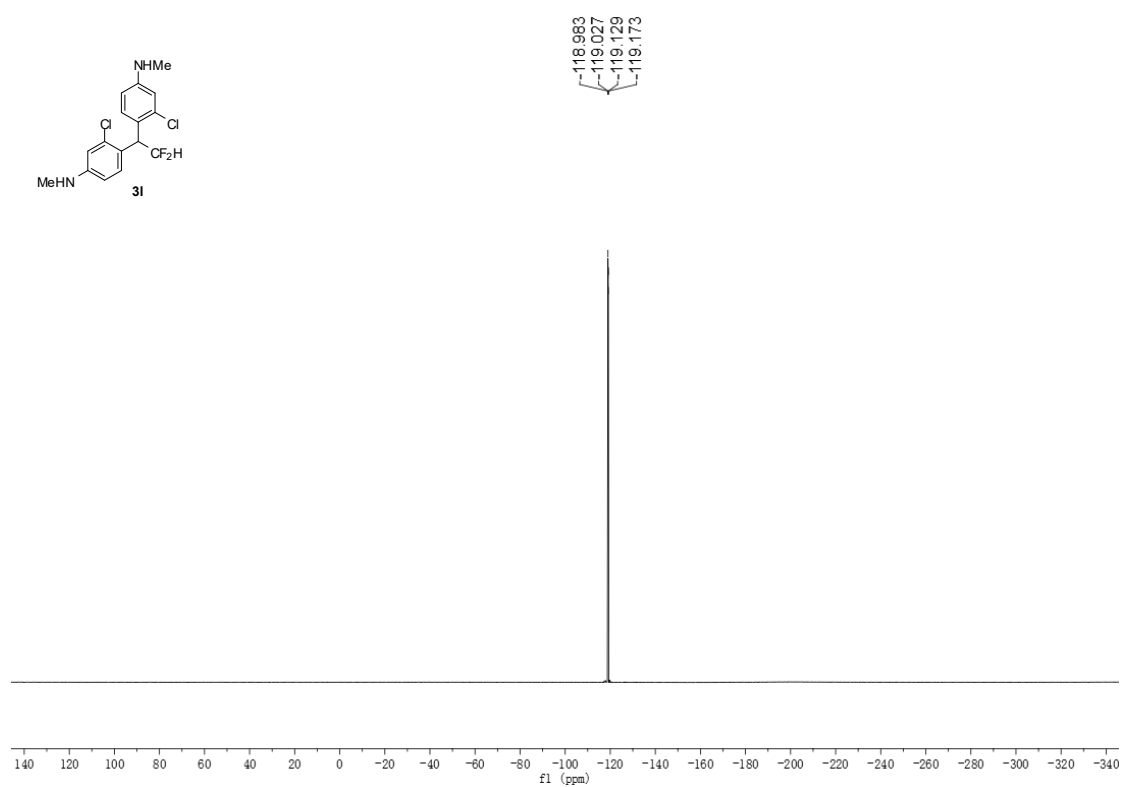

$^{13}\text{C}$  NMR (100 MHz,  $\text{CDCl}_3$ ) of **31**

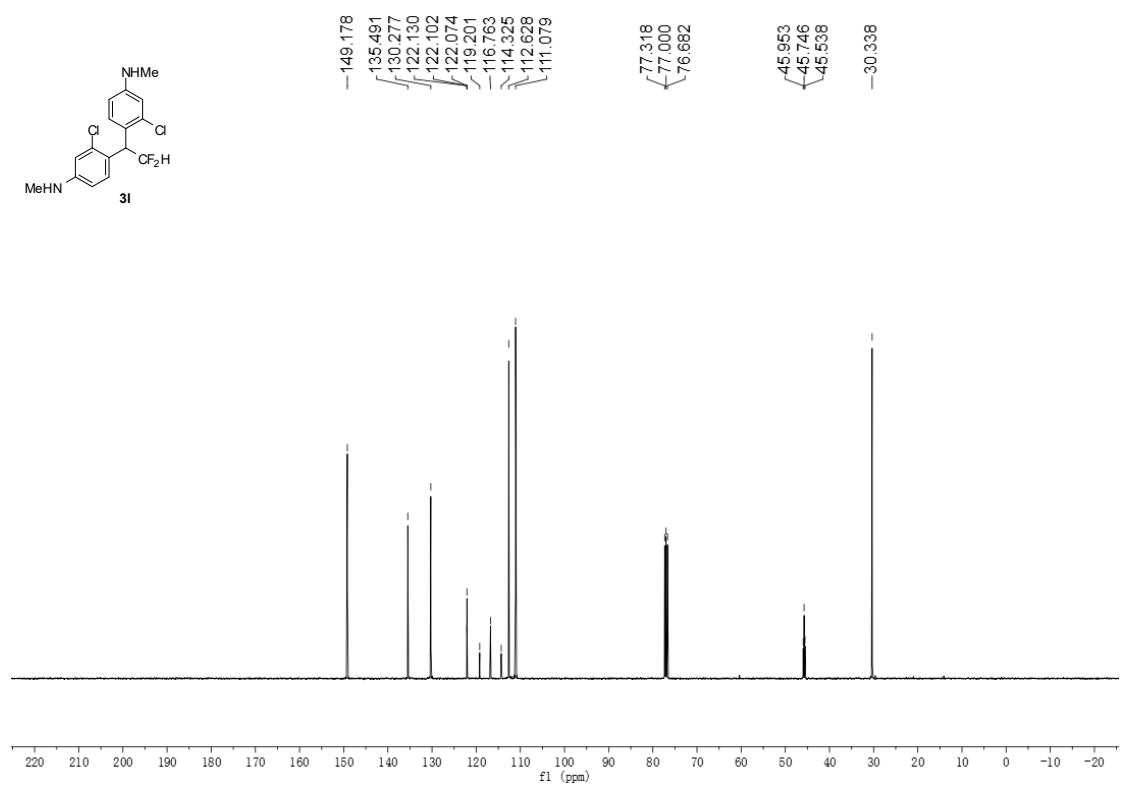

<sup>1</sup>H NMR (400 MHz, CDCl<sub>3</sub>) of **3m**

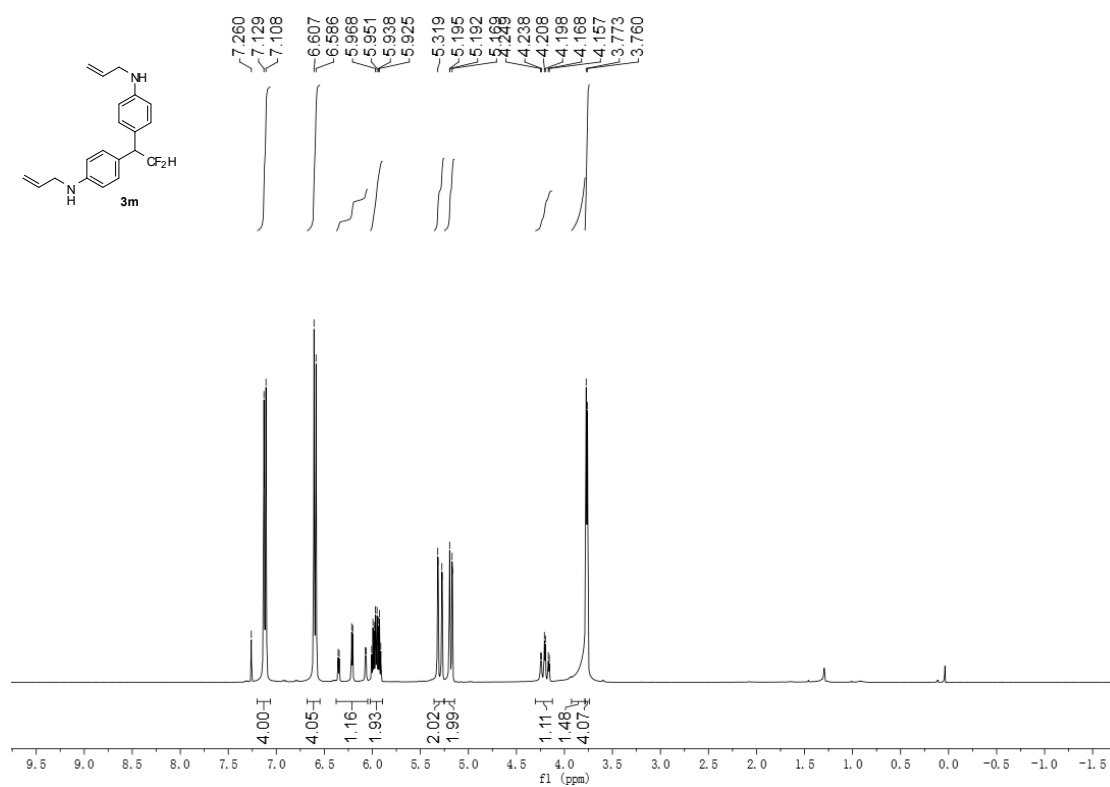

<sup>19</sup>F NMR (376 MHz, CDCl<sub>3</sub>) of **3m**

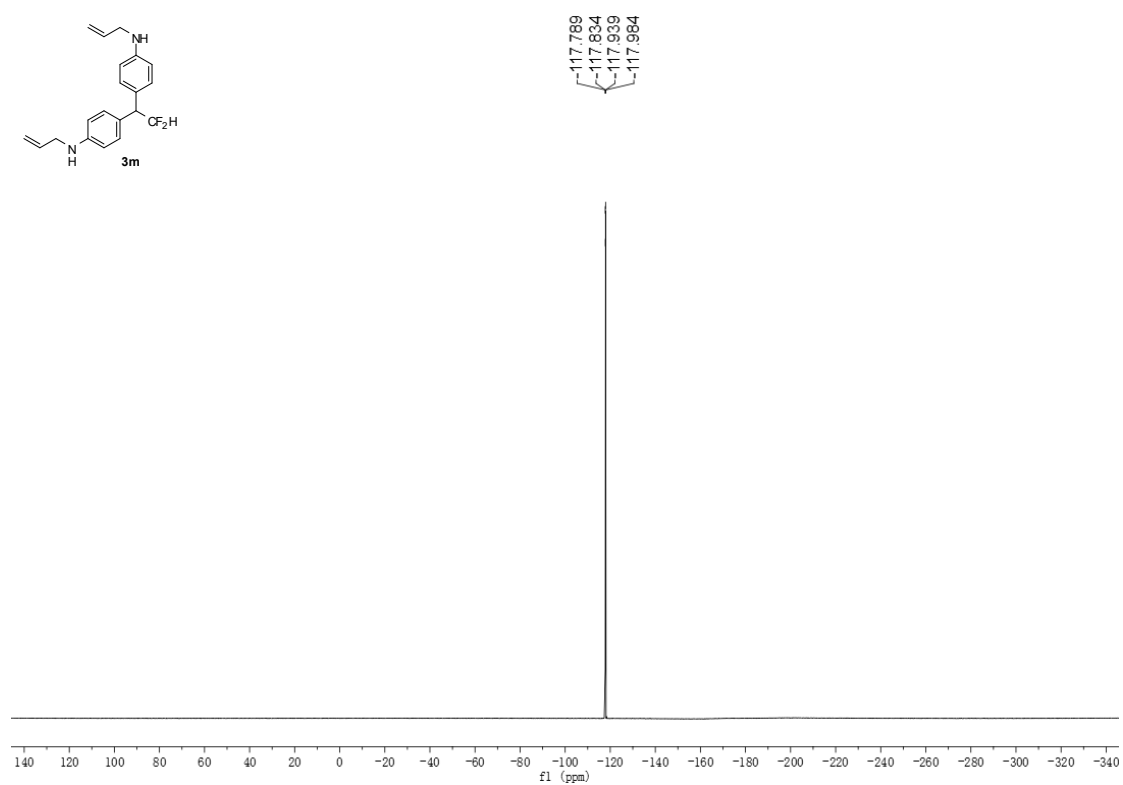



$^{19}\text{F}$  NMR (376 MHz,  $\text{CDCl}_3$ ) of **3n**

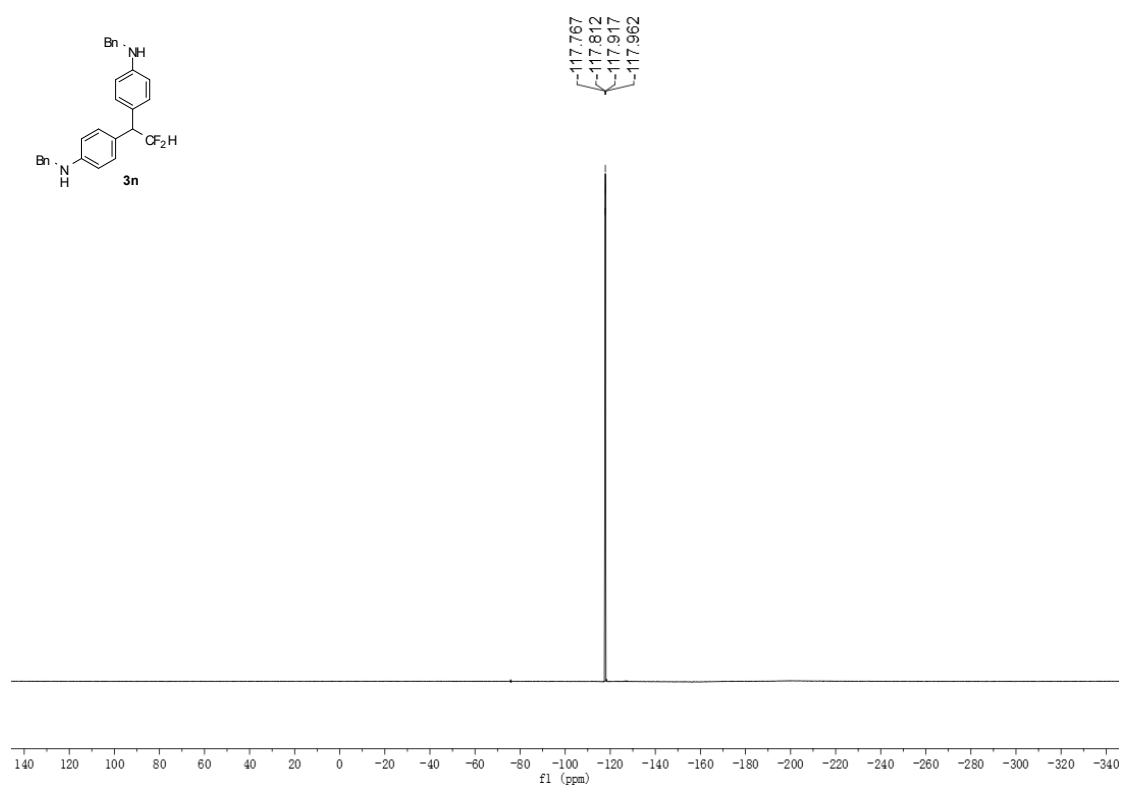

$^{13}\text{C}$  NMR (100 MHz,  $\text{CDCl}_3$ ) of **3n**

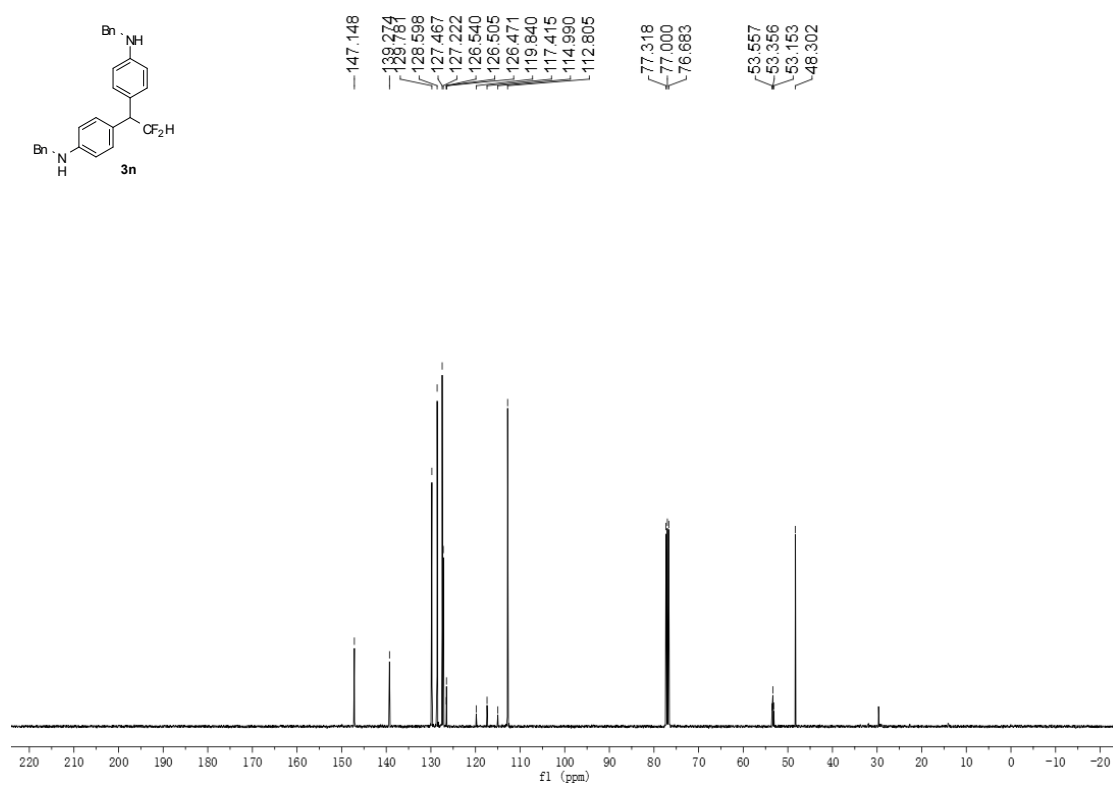

<sup>1</sup>H NMR (400 MHz, CDCl<sub>3</sub>) of **3o**

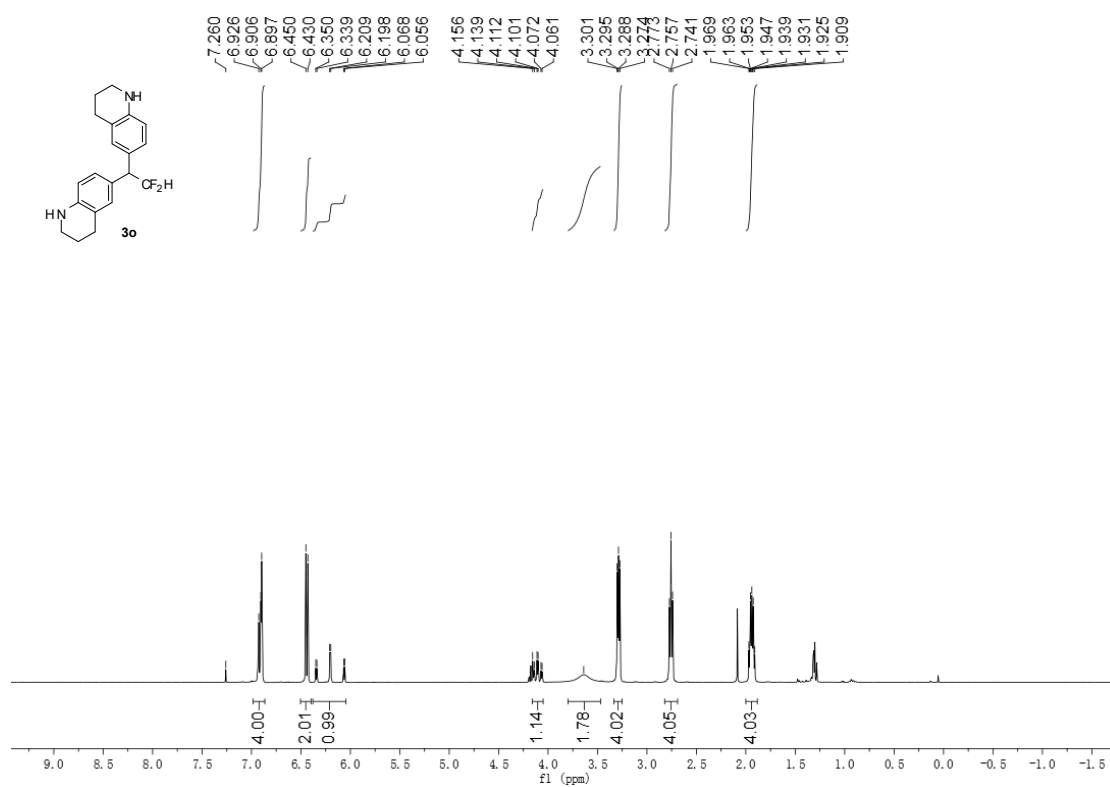

<sup>19</sup>F NMR (376 MHz, CDCl<sub>3</sub>) of **3o**

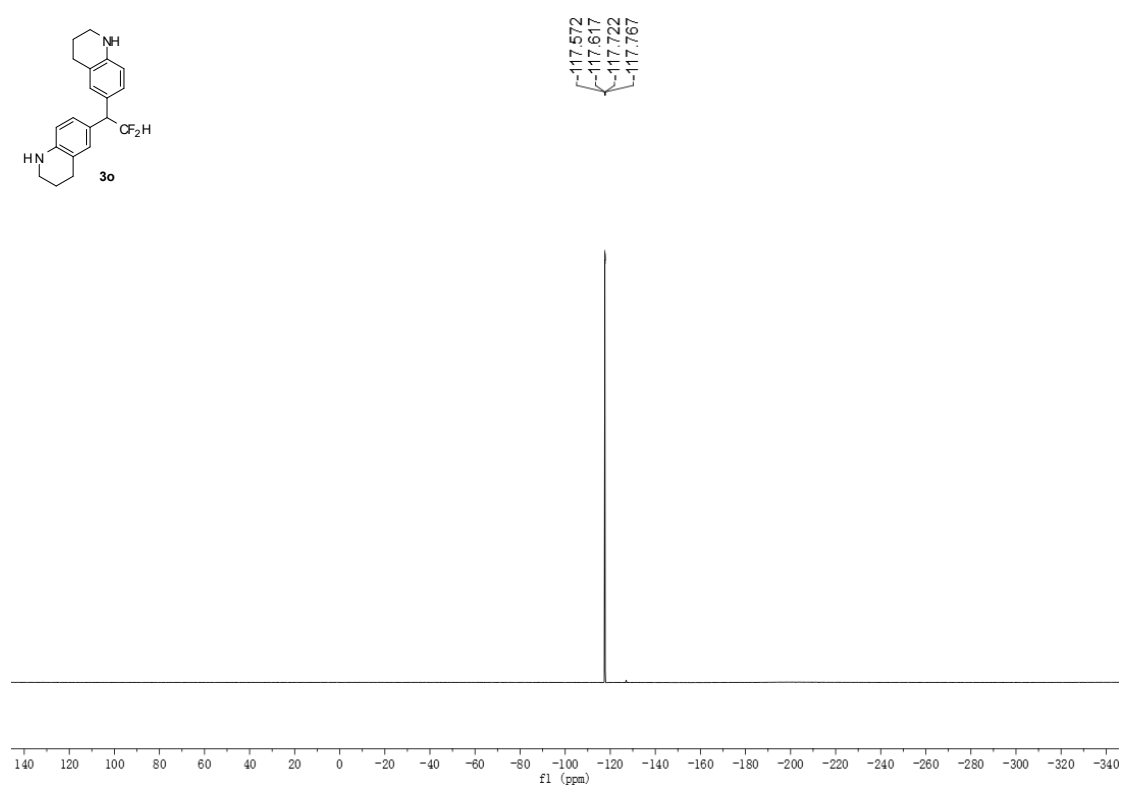

$^{13}\text{C}$  NMR (100 MHz,  $\text{CDCl}_3$ ) of **3o**

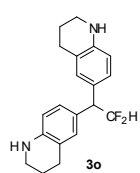

143.739  
129.992  
127.101  
126.088  
126.054  
126.017  
121.378  
119.979  
117.556  
115.133  
114.147

77.318  
77.000  
76.682

53.756  
53.563  
53.351

41.883

26.944  
22.024

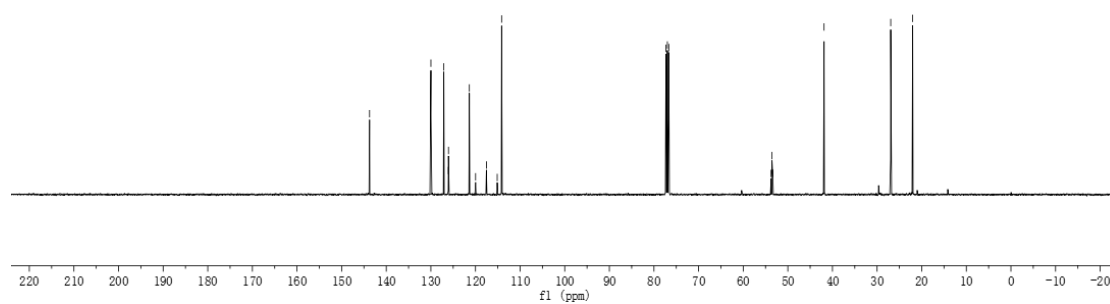

$^1\text{H}$  NMR (400 MHz,  $\text{CDCl}_3$ ) of **3p**

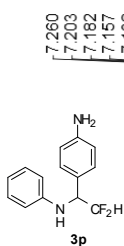

7.260  
7.203  
7.182  
7.157  
7.138  
7.118  
6.750  
6.732  
6.714  
6.686  
6.665  
6.627  
6.607  
6.086  
5.946  
5.938  
5.606  
5.298  
4.822  
4.596  
4.589  
4.564  
4.557  
4.282  
-3.606

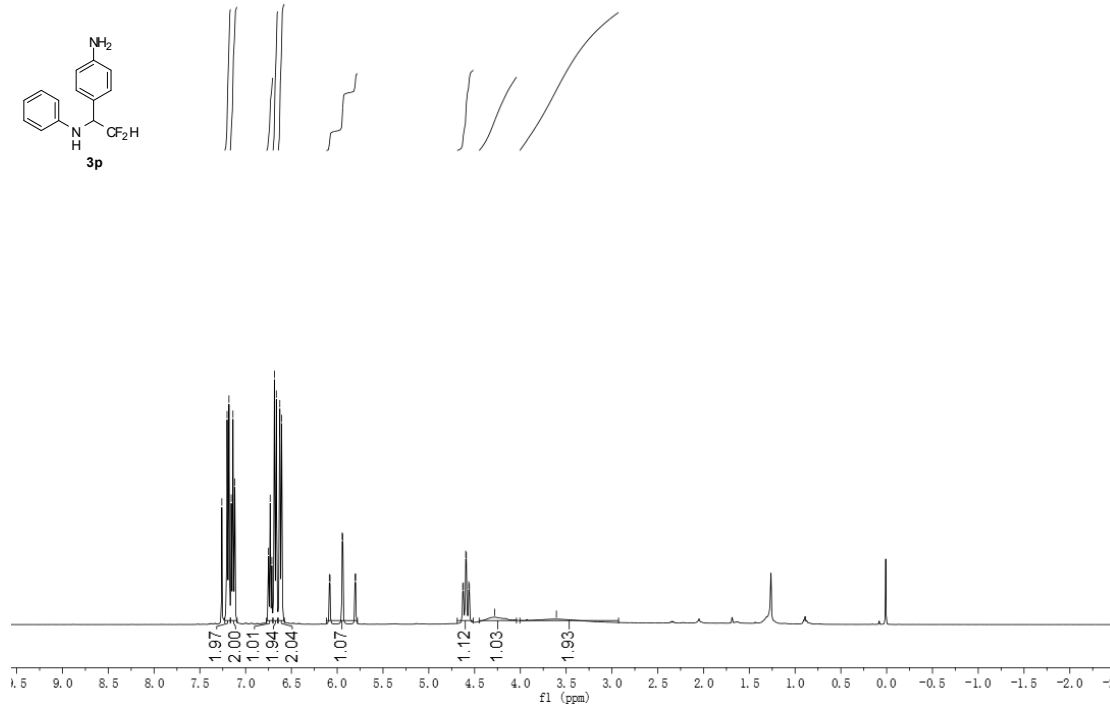

<sup>19</sup>F NMR (376 MHz, CDCl<sub>3</sub>) of **3p**

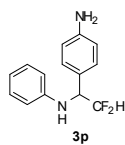

124.478  
124.512  
124.626  
124.662  
125.215  
125.249  
125.363  
125.399  
126.749  
126.784  
126.898  
126.932  
127.485  
127.521  
127.635  
127.669

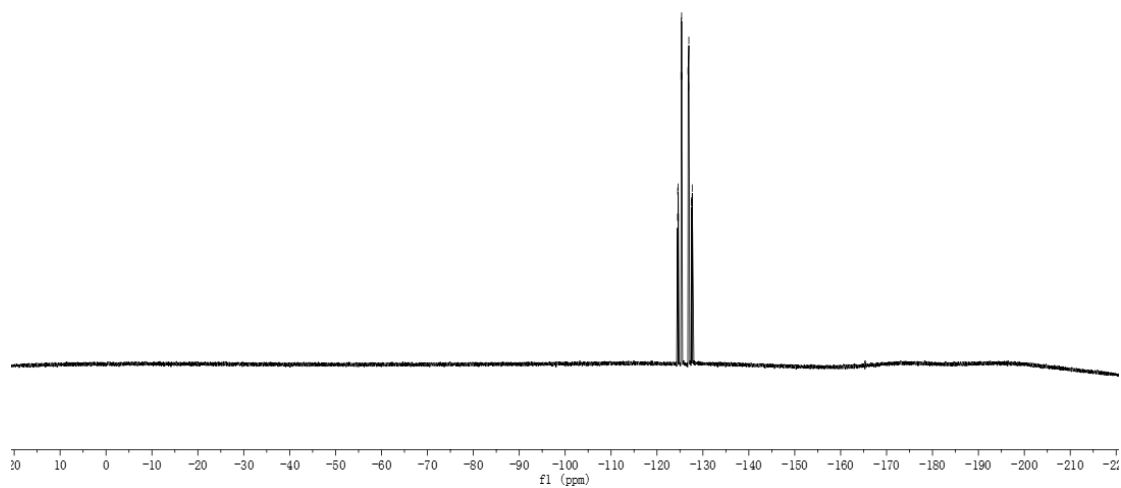

<sup>13</sup>C NMR (100 MHz, CDCl<sub>3</sub>) of **3p**

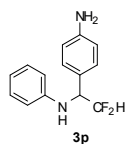

146.596  
146.223  
129.186  
128.686  
124.975  
124.964  
124.941  
118.471  
118.419  
115.965  
115.307  
113.893  
113.510  
77.317  
77.000  
76.682  
59.908  
59.692  
59.476

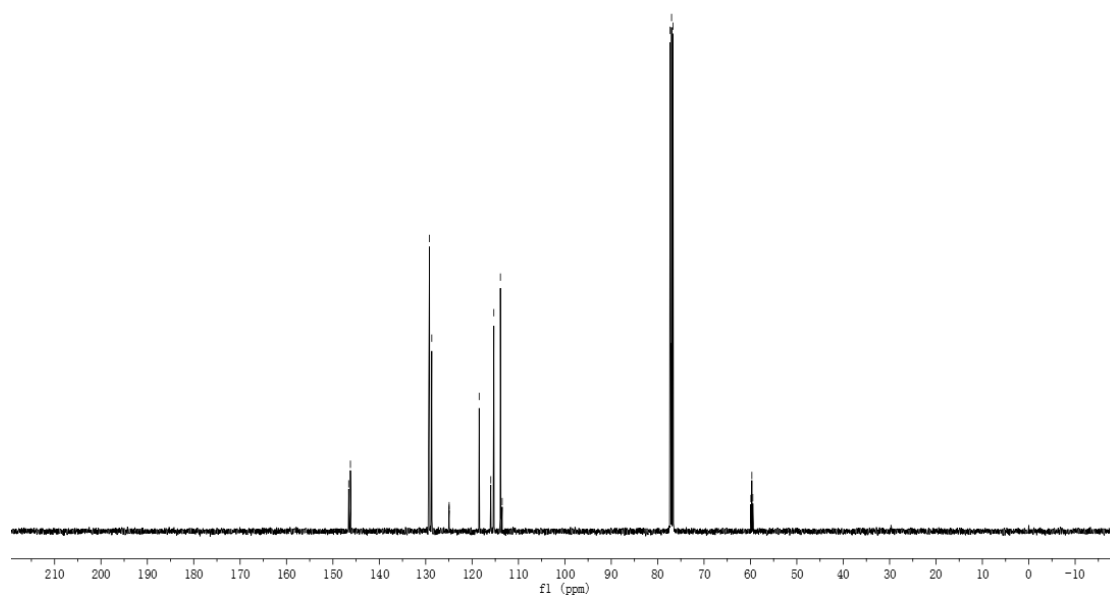

<sup>1</sup>H NMR (400 MHz, CDCl<sub>3</sub>) of **3q**

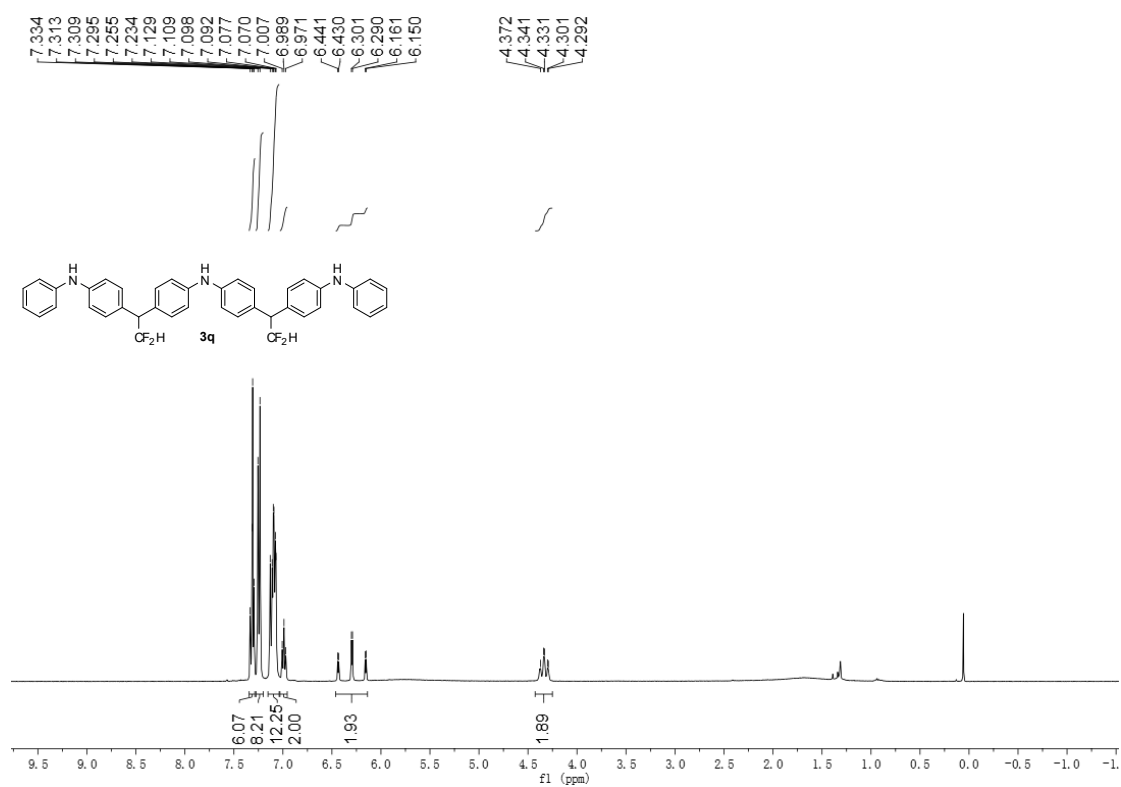

<sup>19</sup>F NMR (376 MHz, CDCl<sub>3</sub>) of **3q**

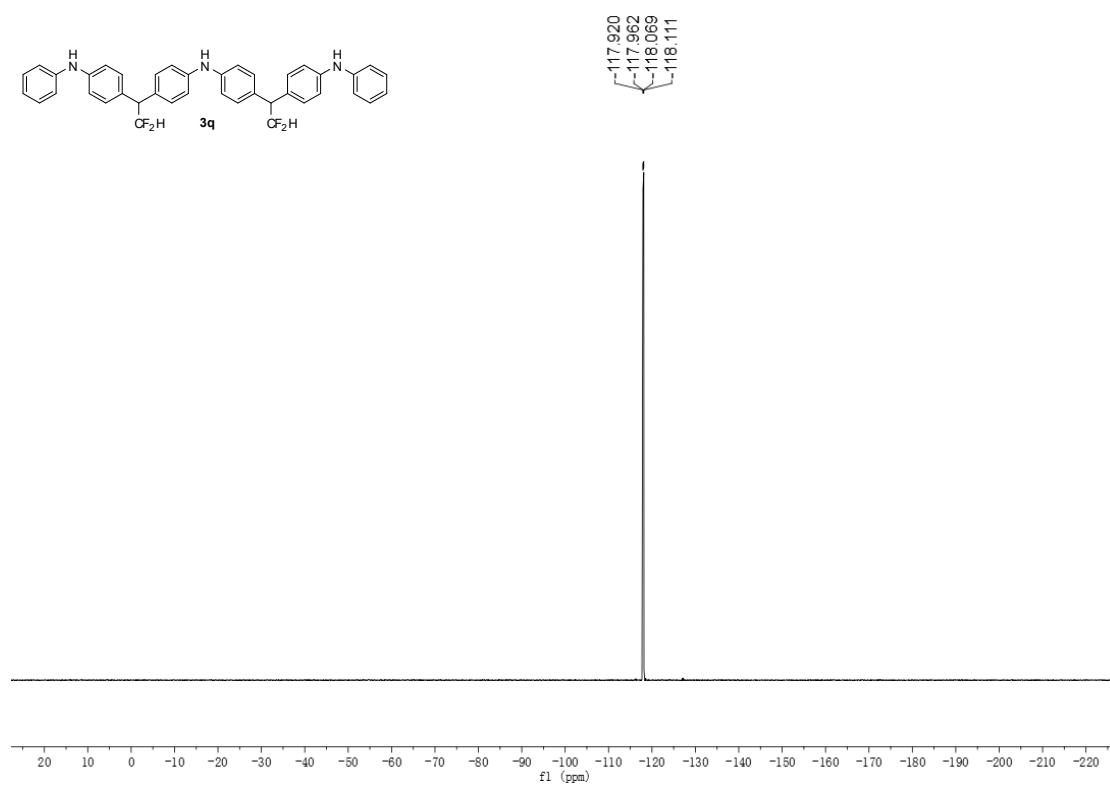



$^{13}\text{C}$  NMR (100 MHz,  $\text{CDCl}_3$ ) of **3q**

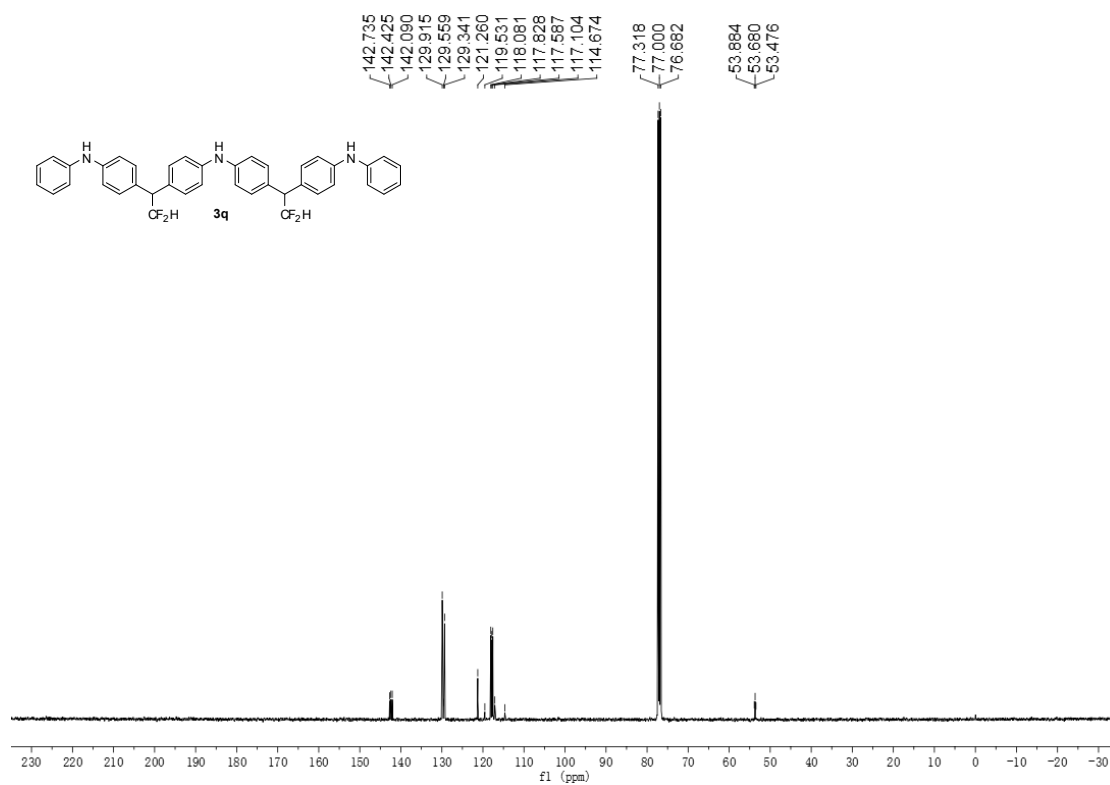

$^1\text{H}$  NMR (400 MHz,  $\text{CDCl}_3$ ) of **3r**

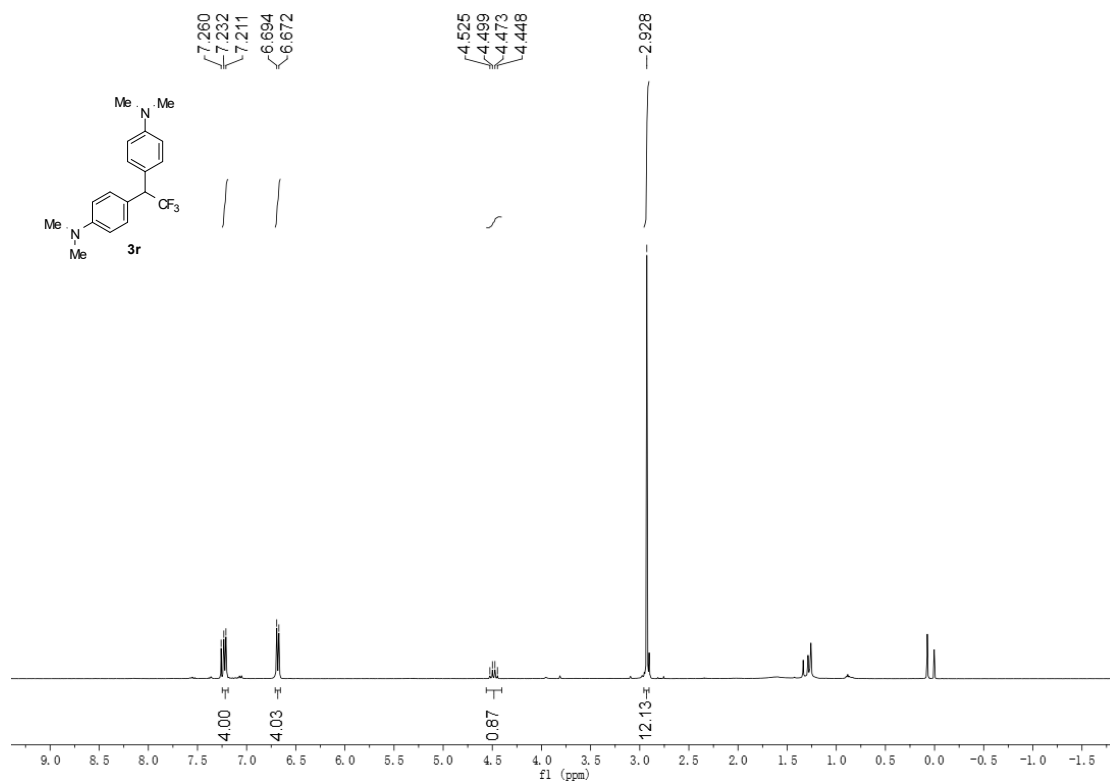

<sup>19</sup>F NMR (376 MHz, CDCl<sub>3</sub>) of **3r**

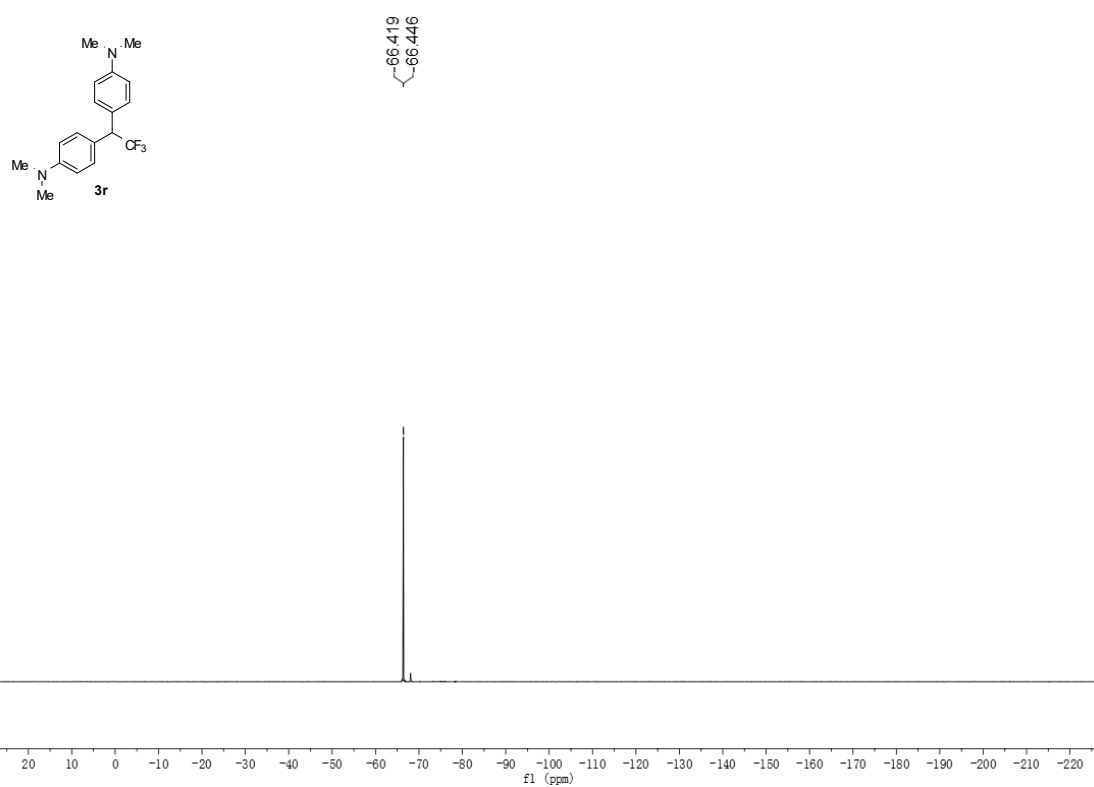

<sup>13</sup>C NMR (100 MHz, CDCl<sub>3</sub>) of **3r**

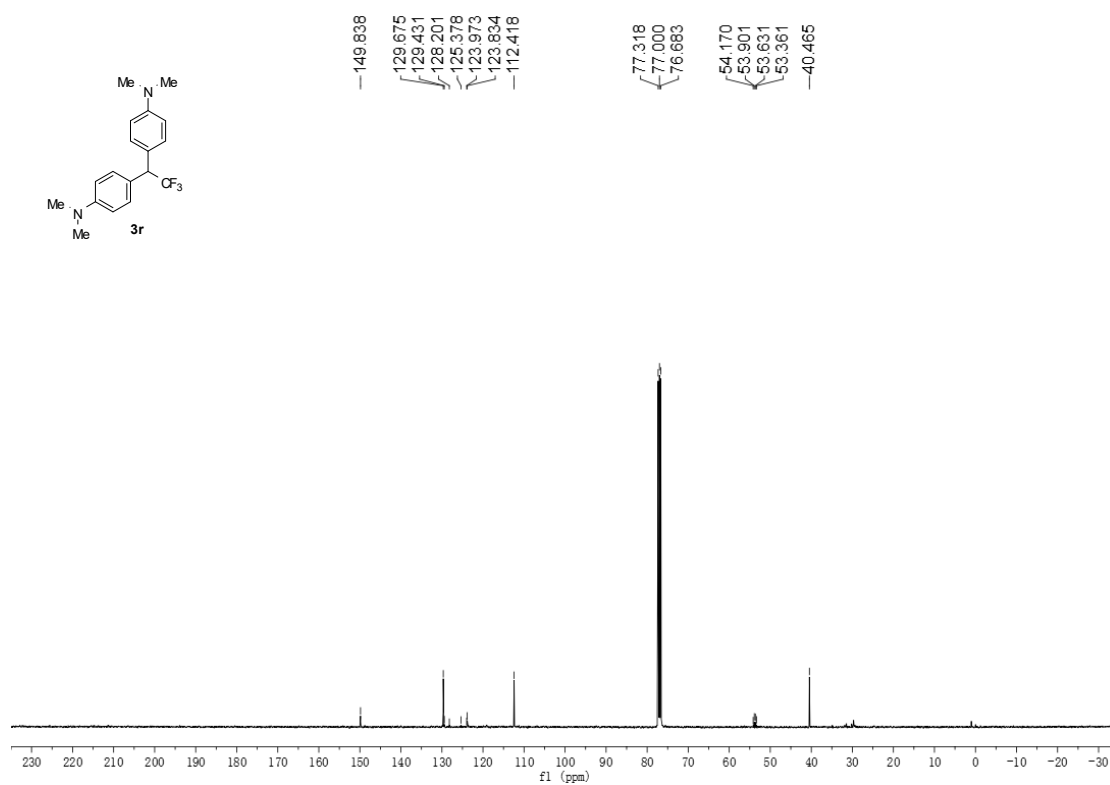

$^1\text{H}$  NMR (400 MHz,  $\text{CDCl}_3$ ) of **3s**

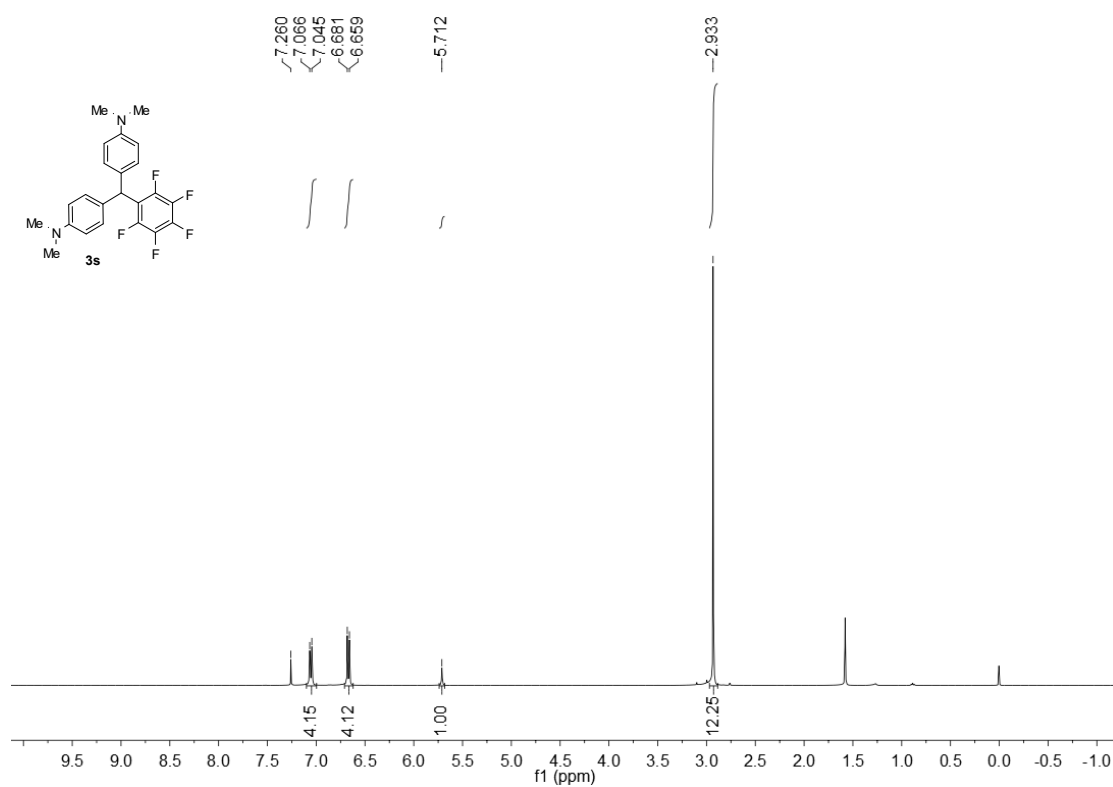

$^{19}\text{F}$  NMR (376 MHz,  $\text{CDCl}_3$ ) of **3s**

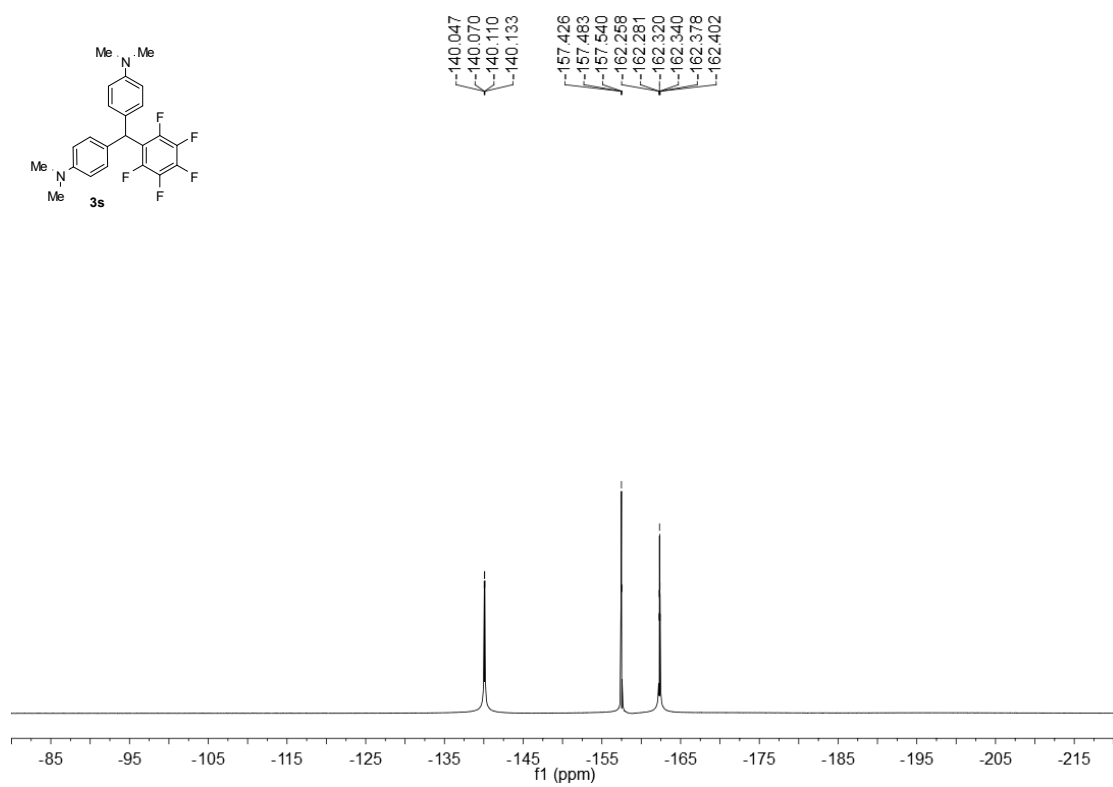

$^{13}\text{C}$  NMR (100 MHz,  $\text{CDCl}_3$ ) of **3s**

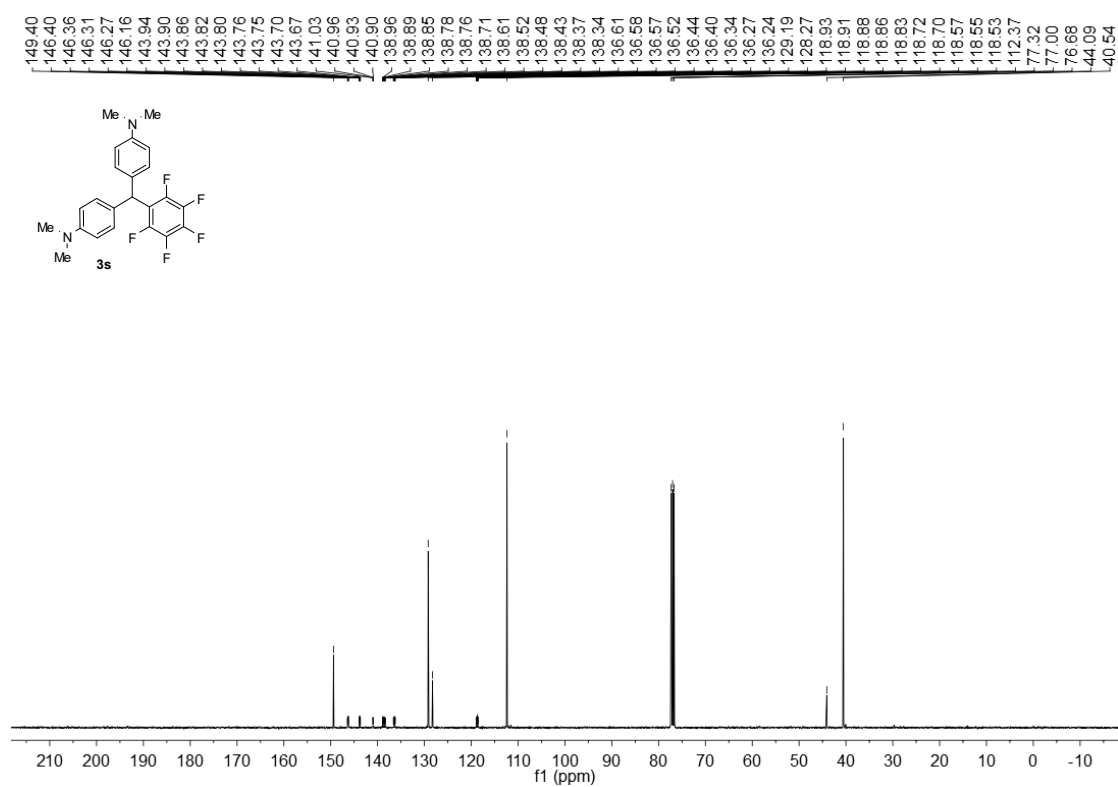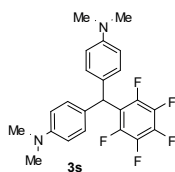

$^1\text{H}$  NMR (400 MHz,  $\text{CDCl}_3$ ) of **3t**

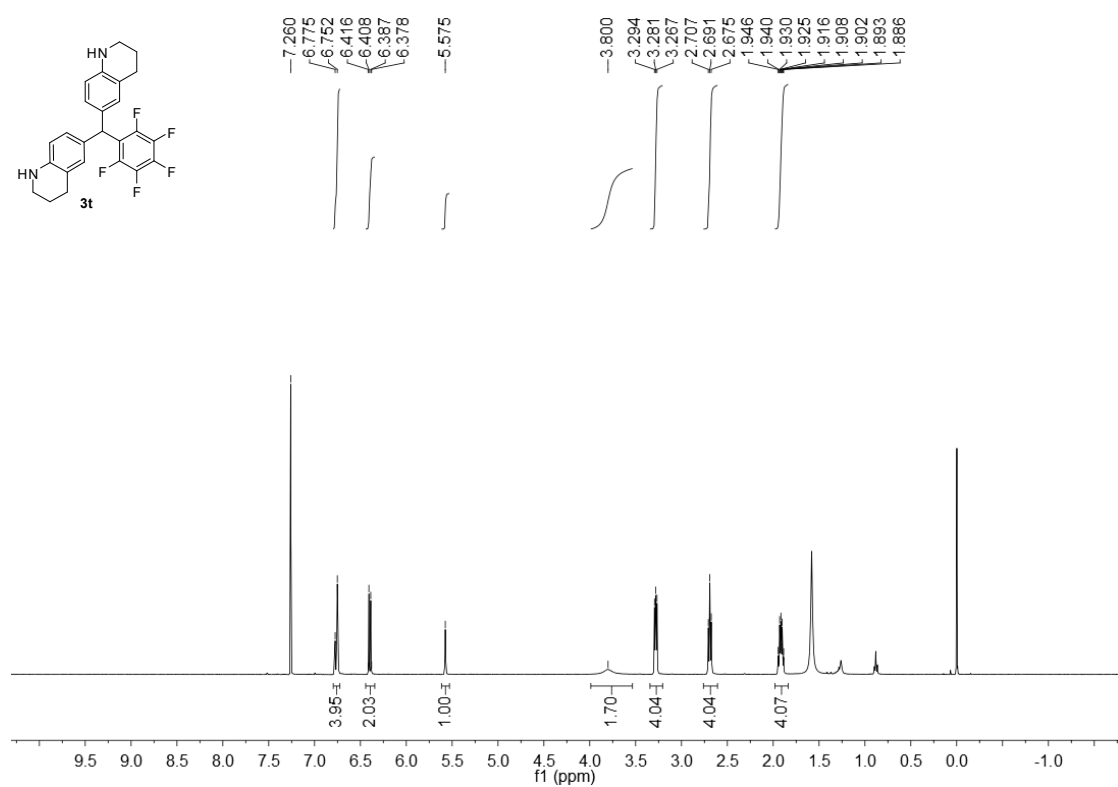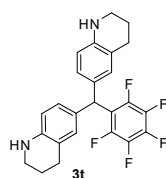

$^{19}\text{F}$  NMR (376 MHz,  $\text{CDCl}_3$ ) of **3t**

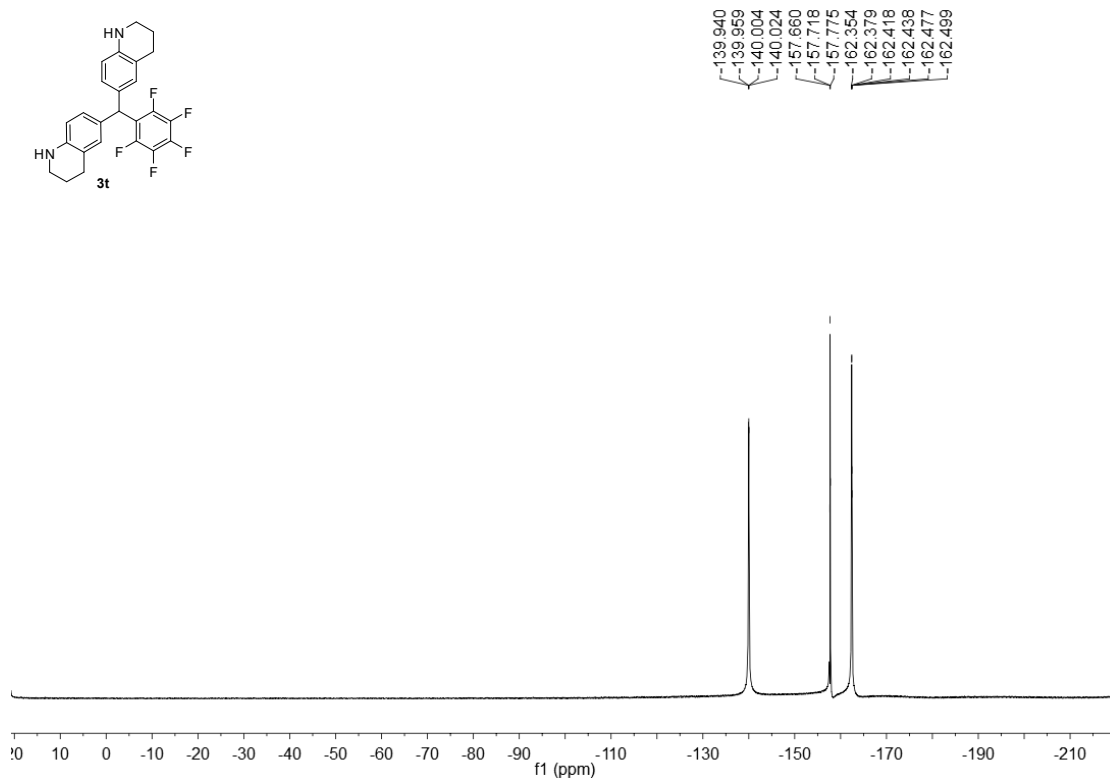

$^{13}\text{C}$  NMR (100 MHz,  $\text{CDCl}_3$ ) of **3t**

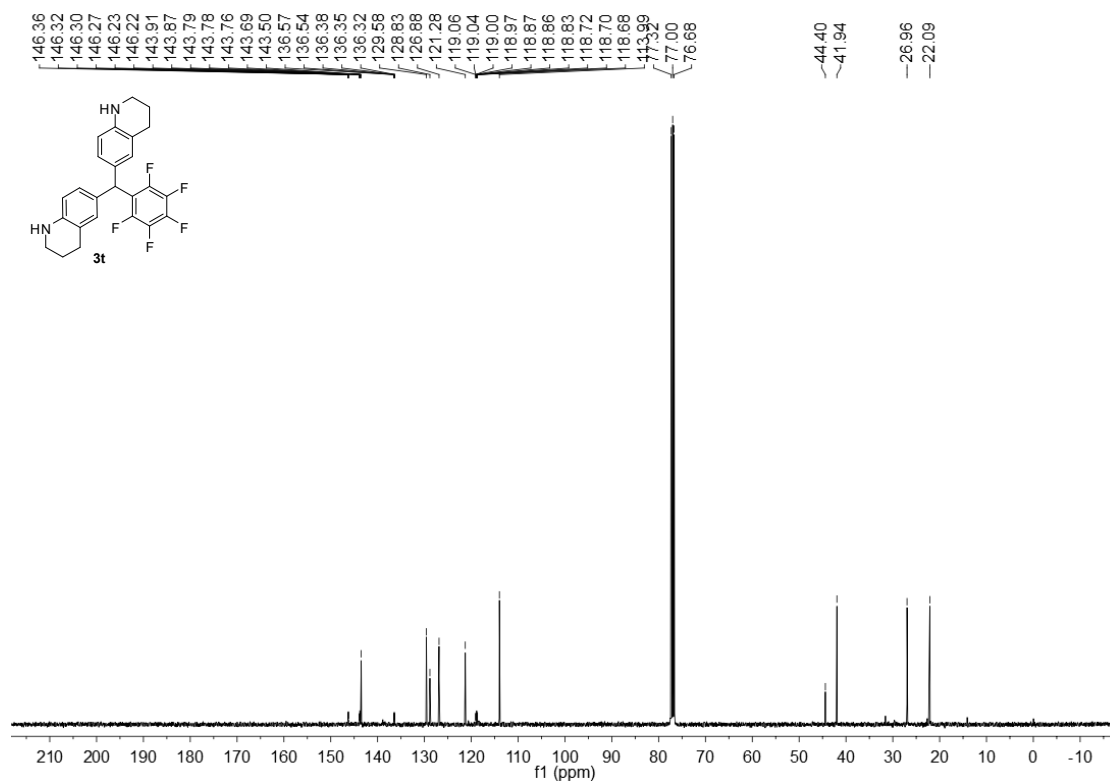

<sup>1</sup>H NMR (400 MHz, CDCl<sub>3</sub>) of **5a**

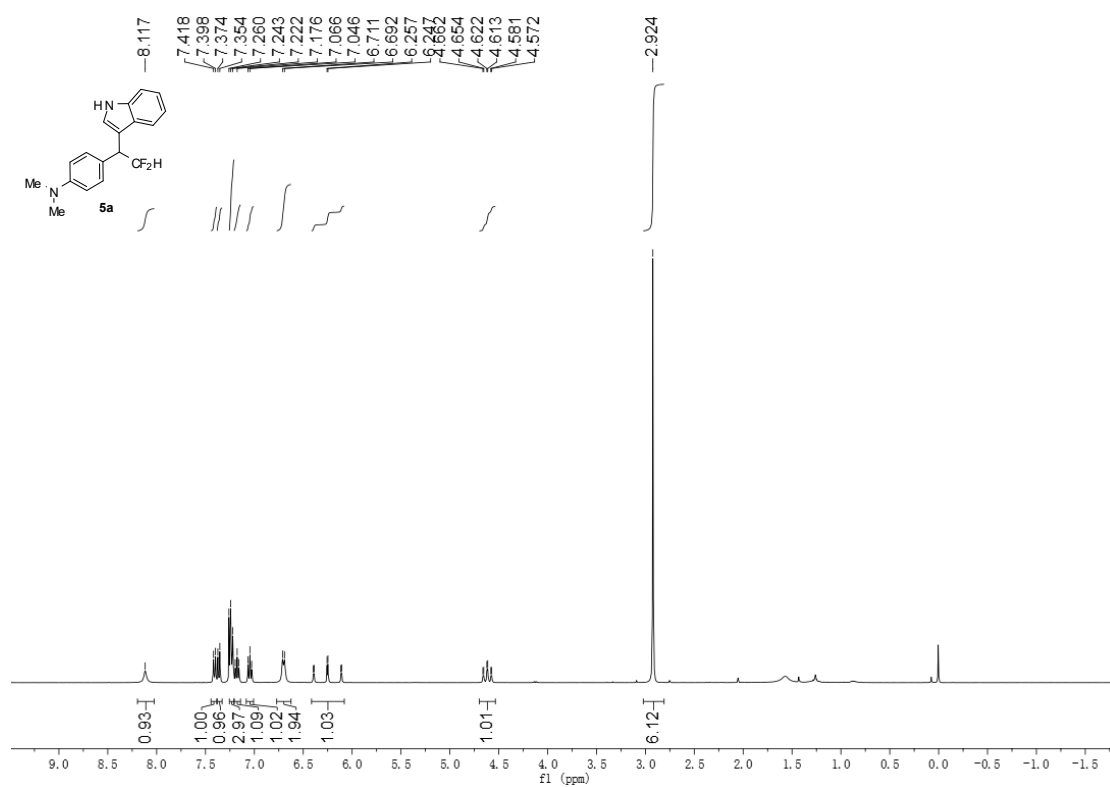

<sup>19</sup>F NMR (376 MHz, CDCl<sub>3</sub>) of **5a**

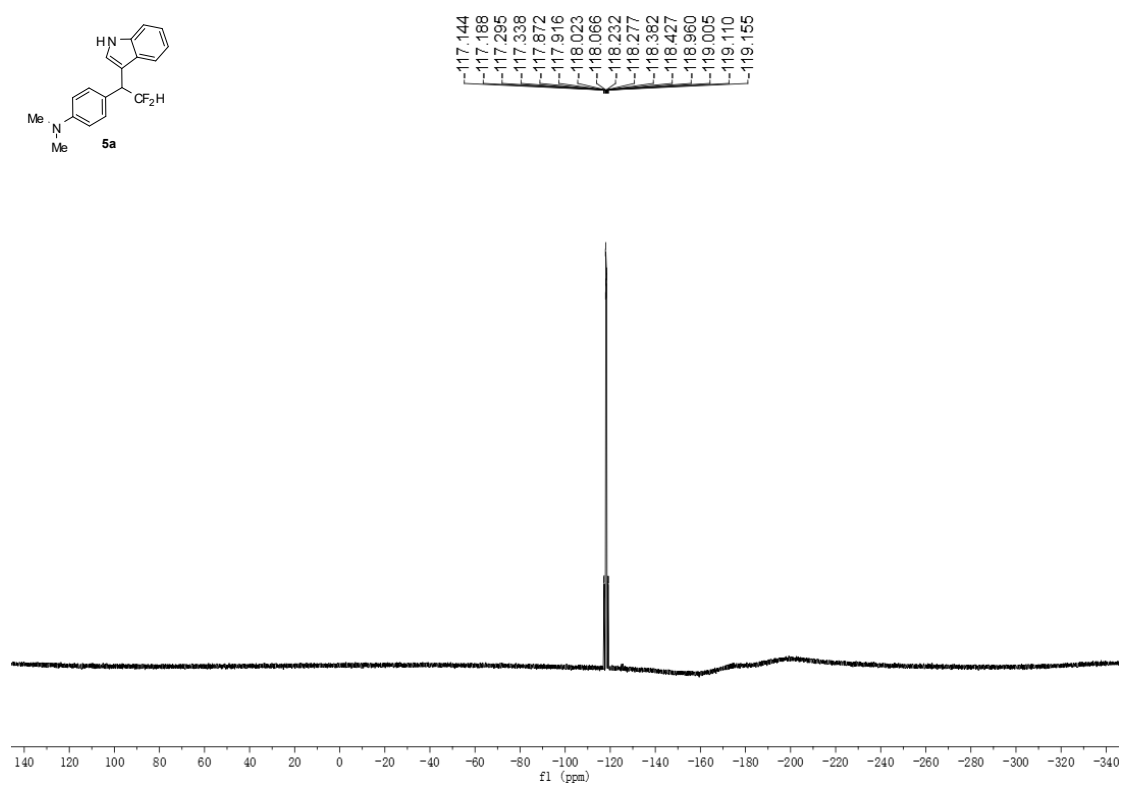

$^{13}\text{C}$  NMR (100 MHz,  $\text{CDCl}_3$ ) of **5a**

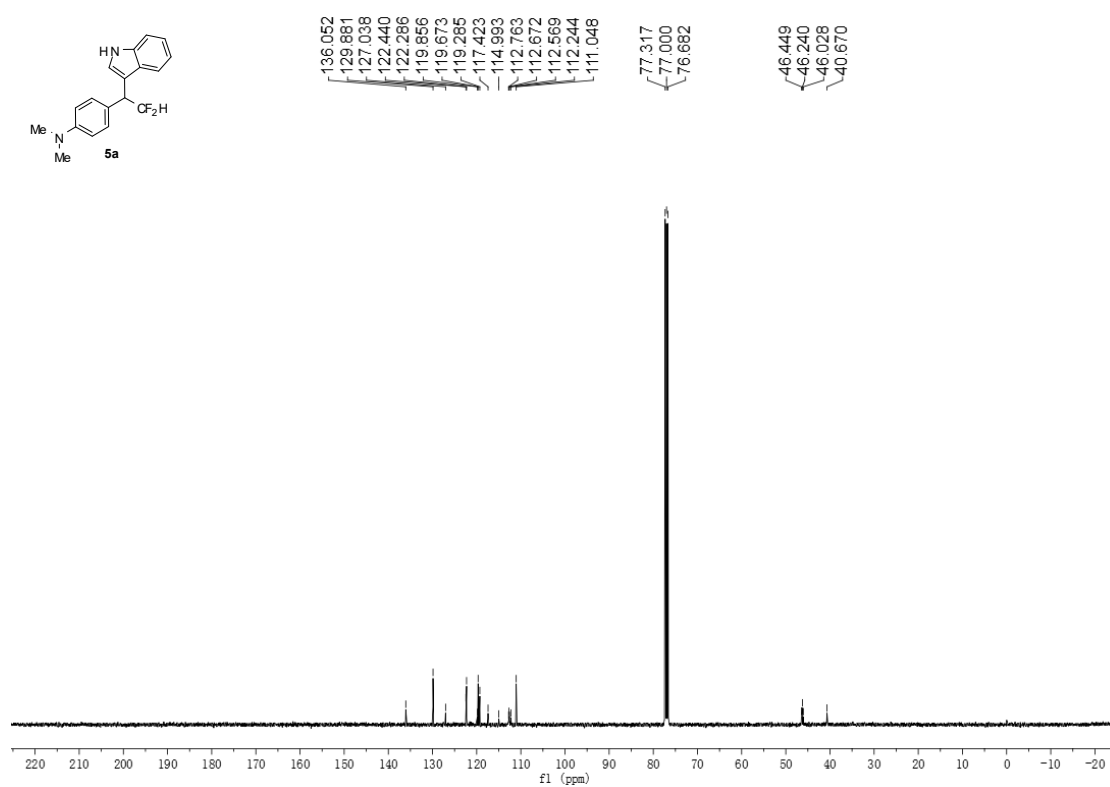

$^1\text{H}$  NMR (400 MHz,  $\text{CDCl}_3$ ) of **5b**

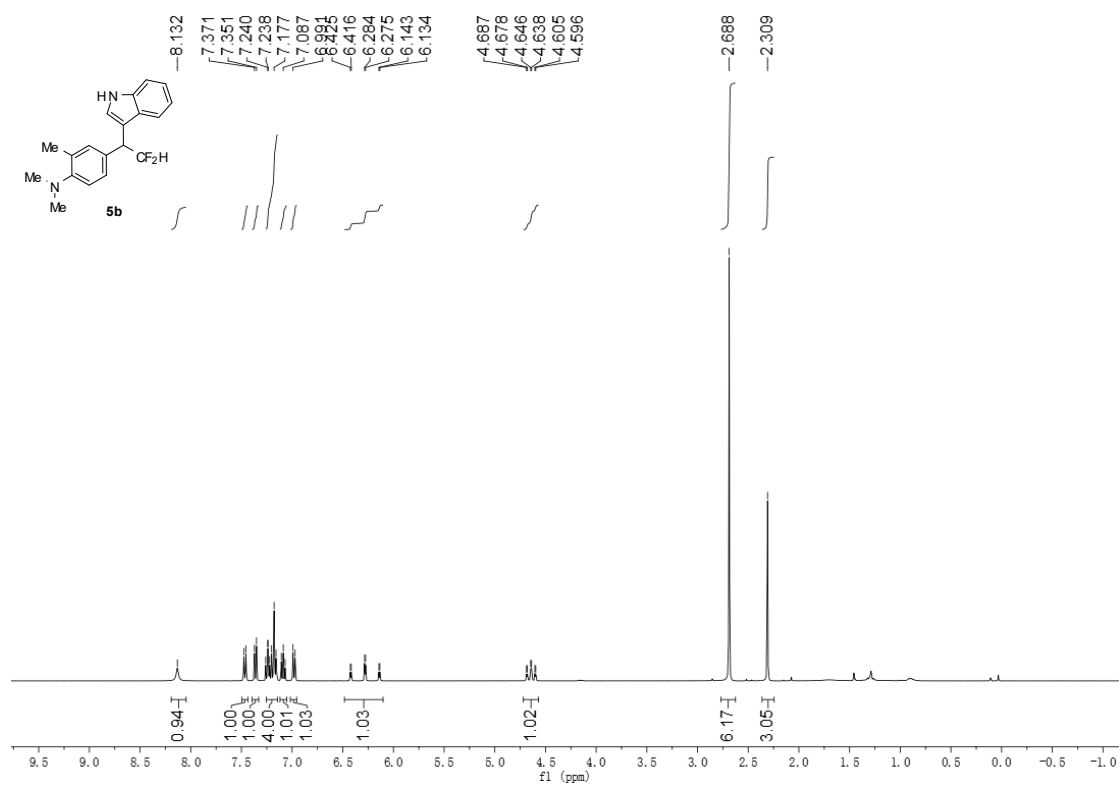

$^{19}\text{F}$  NMR (376 MHz,  $(\text{CD}_3)_2\text{CO}$ ) of **5b**

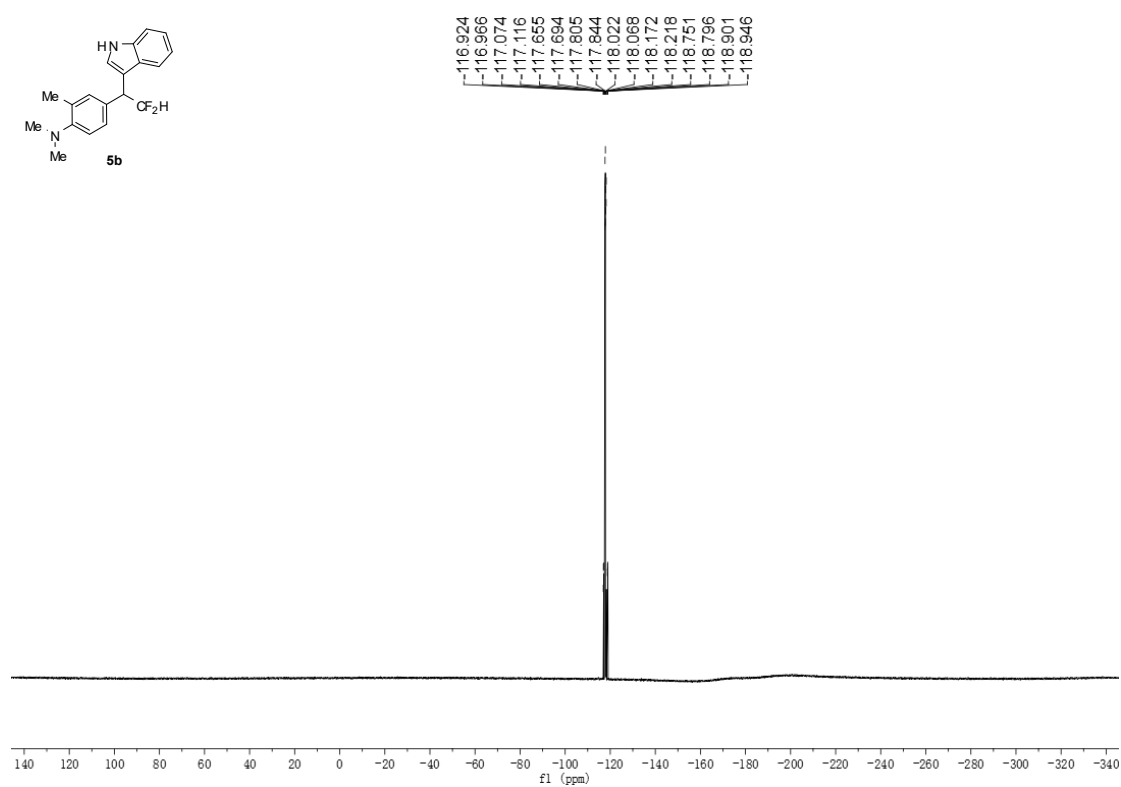

$^{13}\text{C}$  NMR (100 MHz,  $(\text{CD}_3)_2\text{CO}$ ) of **5b**

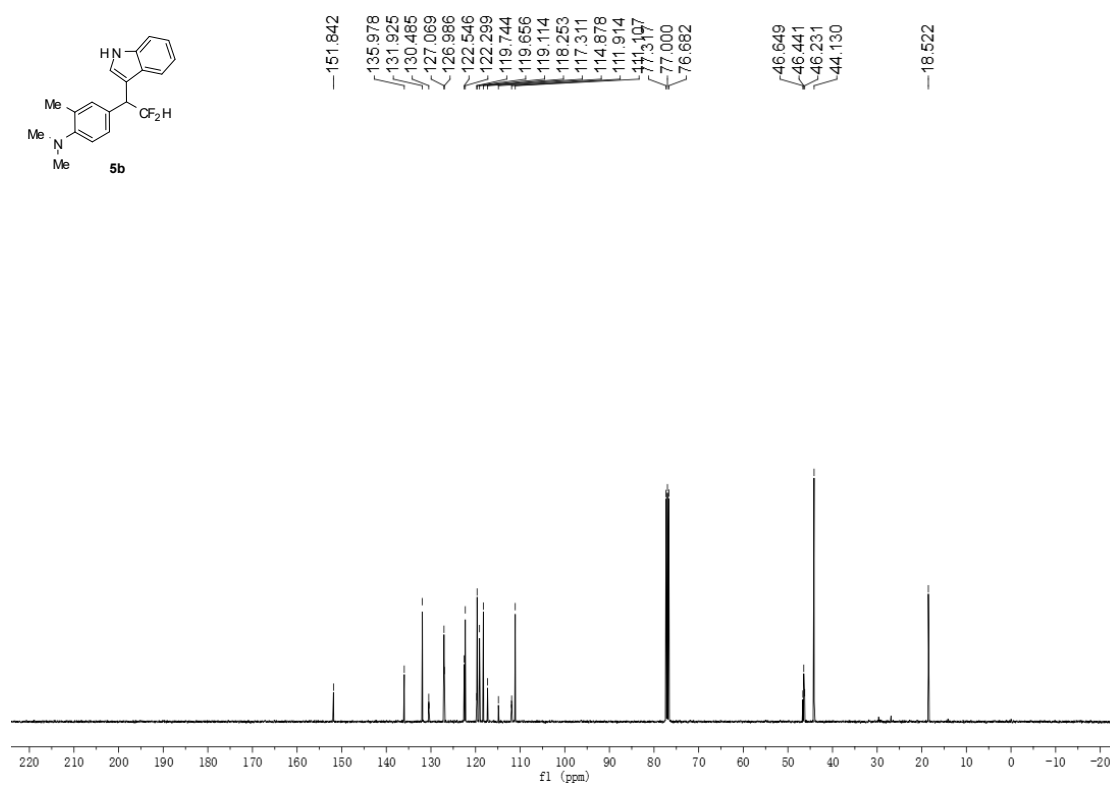



<sup>1</sup>H NMR (400 MHz, CDCl<sub>3</sub>) of **5c**

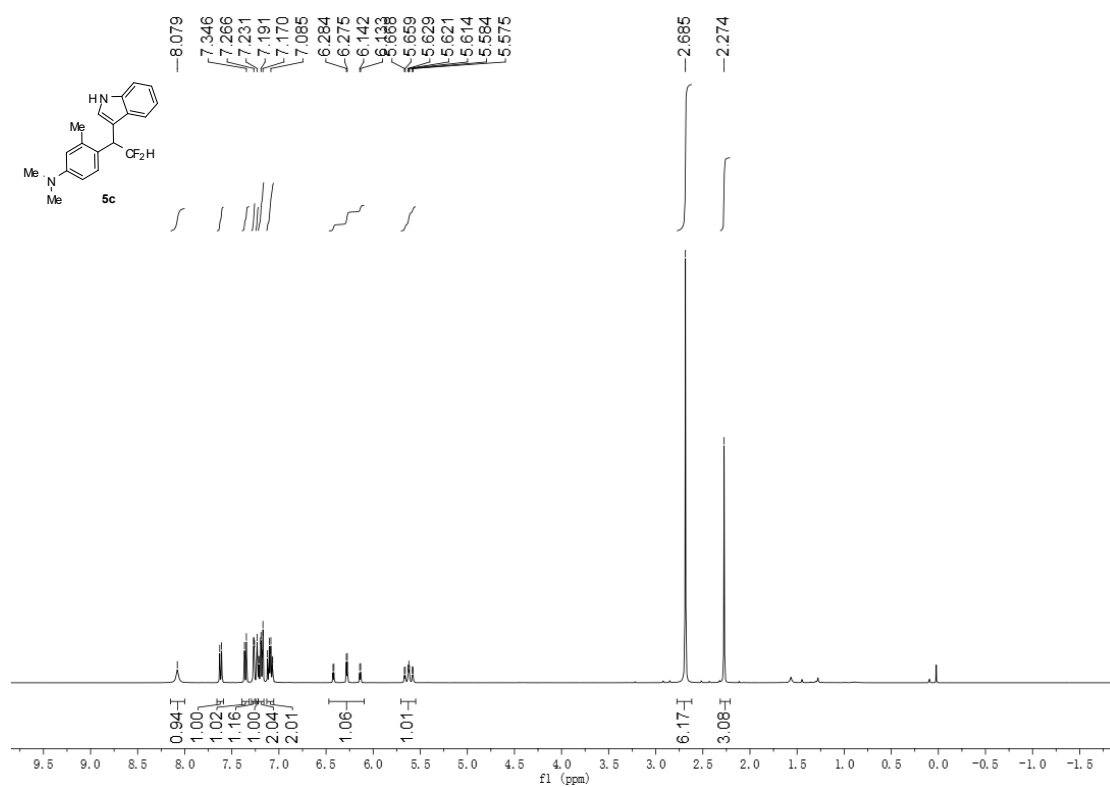

<sup>19</sup>F NMR (376 MHz, CDCl<sub>3</sub>) of **5c**

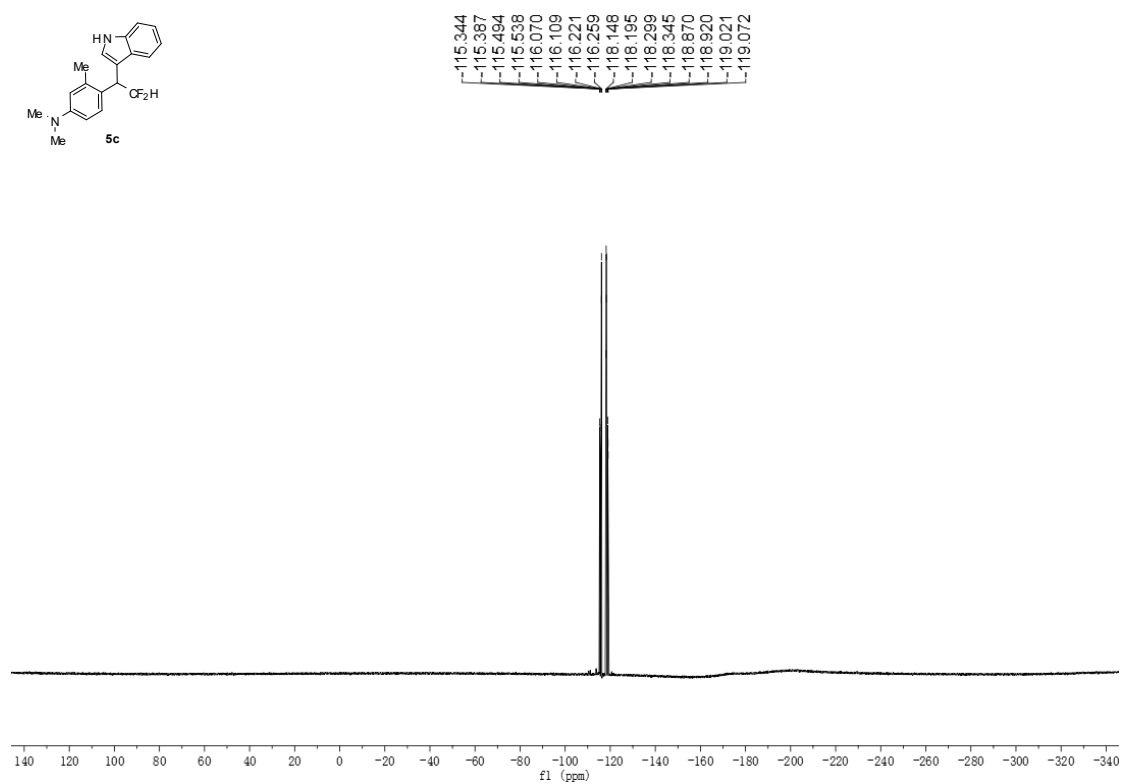

$^{13}\text{C}$  NMR (100 MHz,  $\text{CDCl}_3$ ) of **5c**

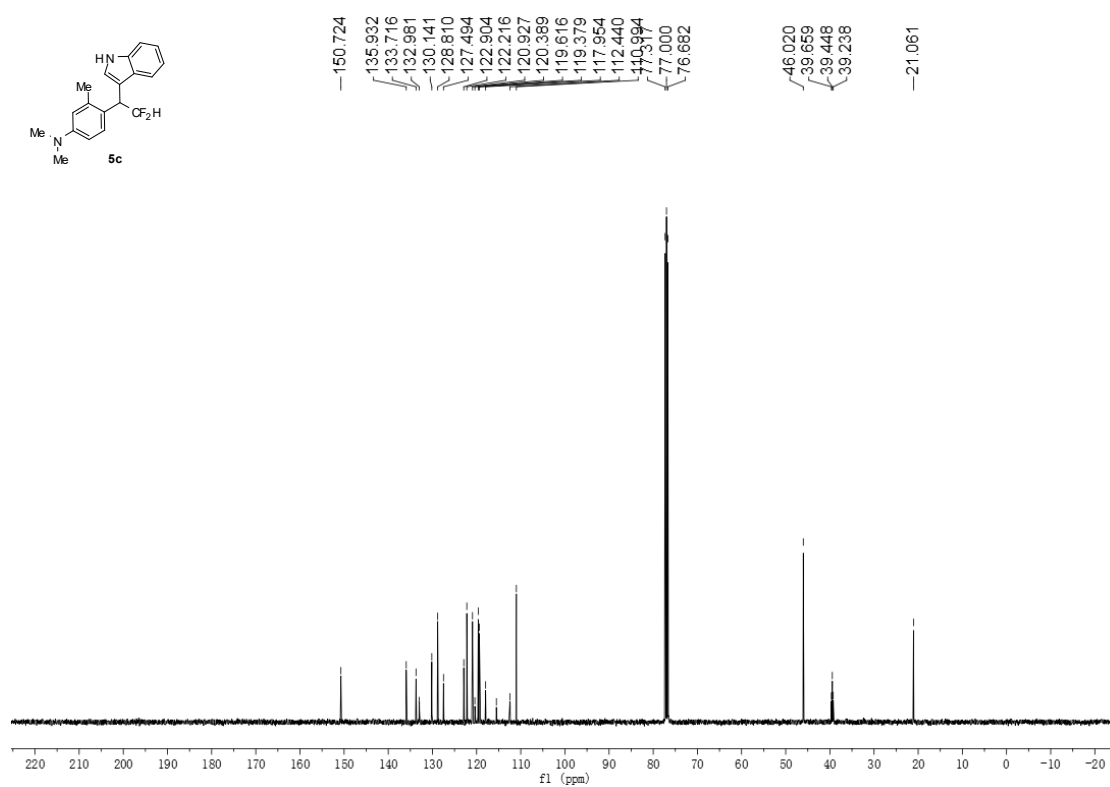

$^1\text{H}$  NMR (400 MHz,  $\text{CDCl}_3$ ) of **5d**

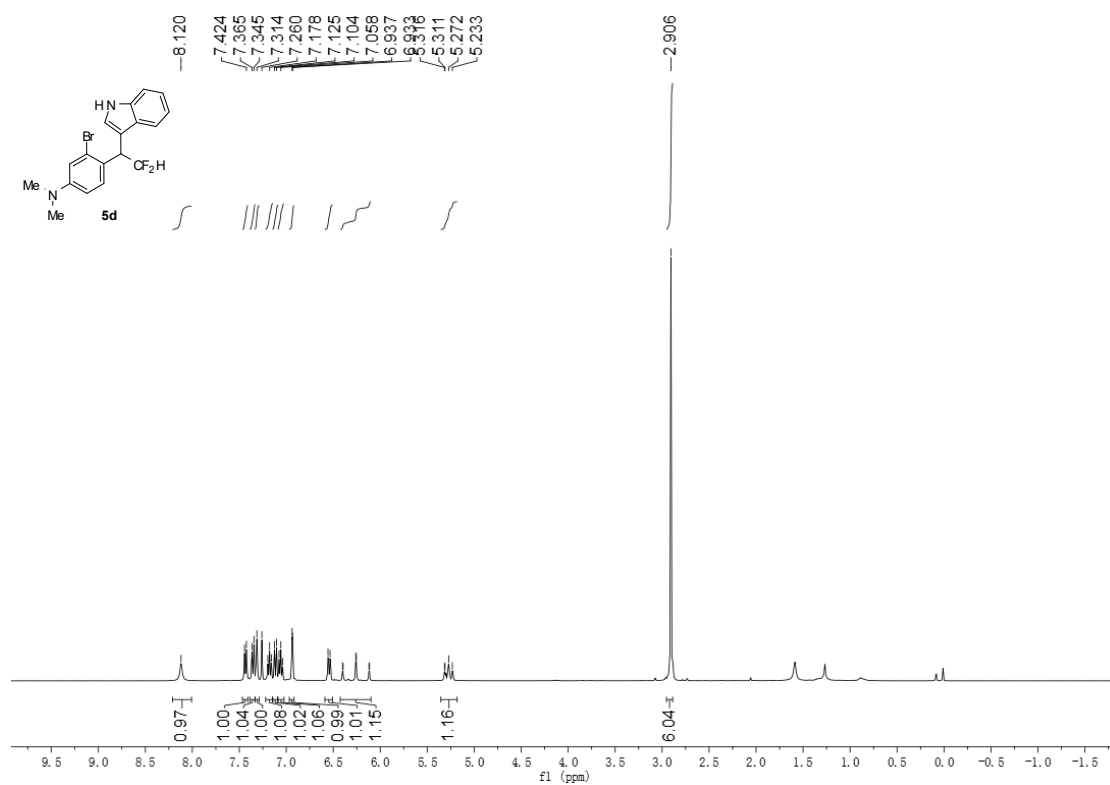

<sup>19</sup>F NMR (376 MHz, CDCl<sub>3</sub>) of **5d**

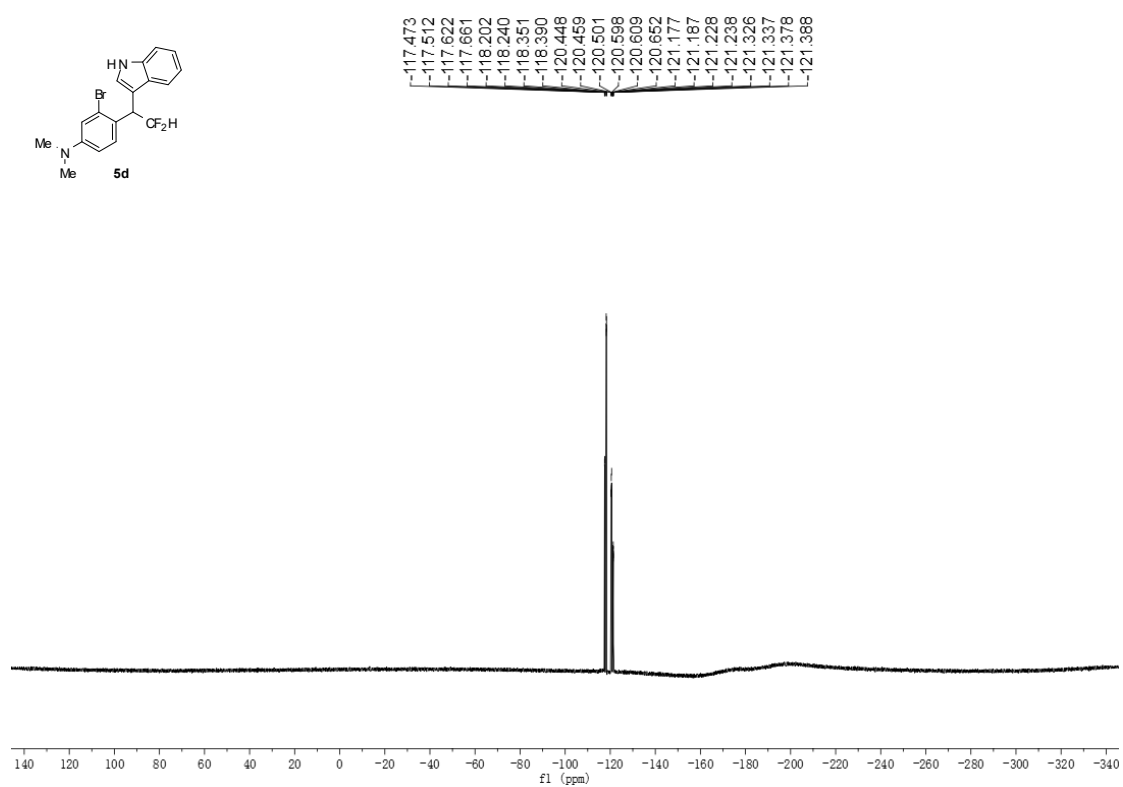

<sup>13</sup>C NMR (100 MHz, CDCl<sub>3</sub>) of **5d**

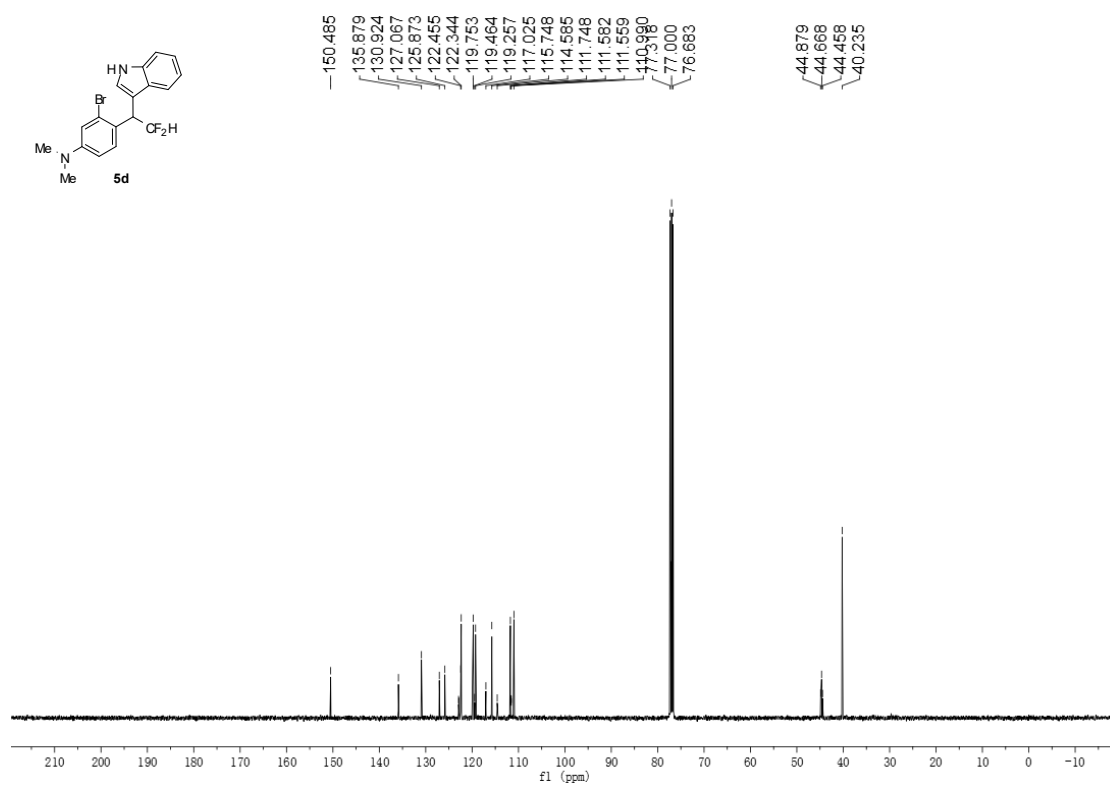

<sup>1</sup>H NMR (400 MHz, CDCl<sub>3</sub>) of **5e**

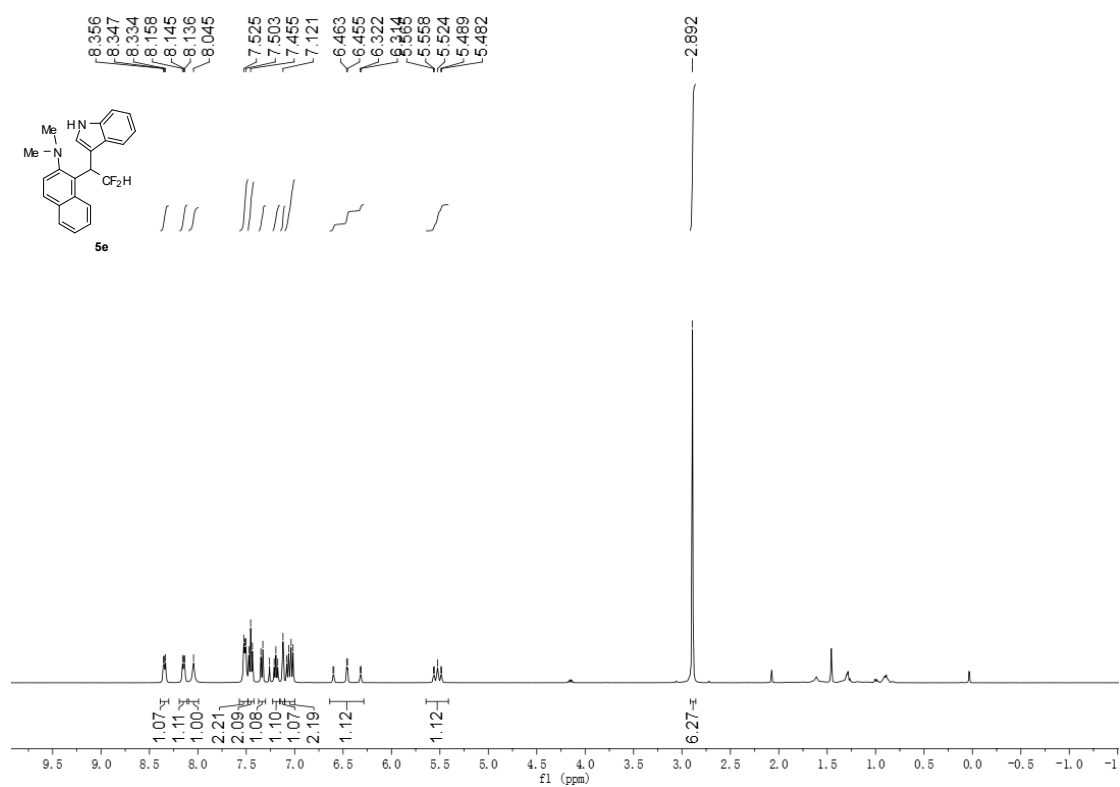

<sup>19</sup>F NMR (376 MHz, CDCl<sub>3</sub>) of **5e**

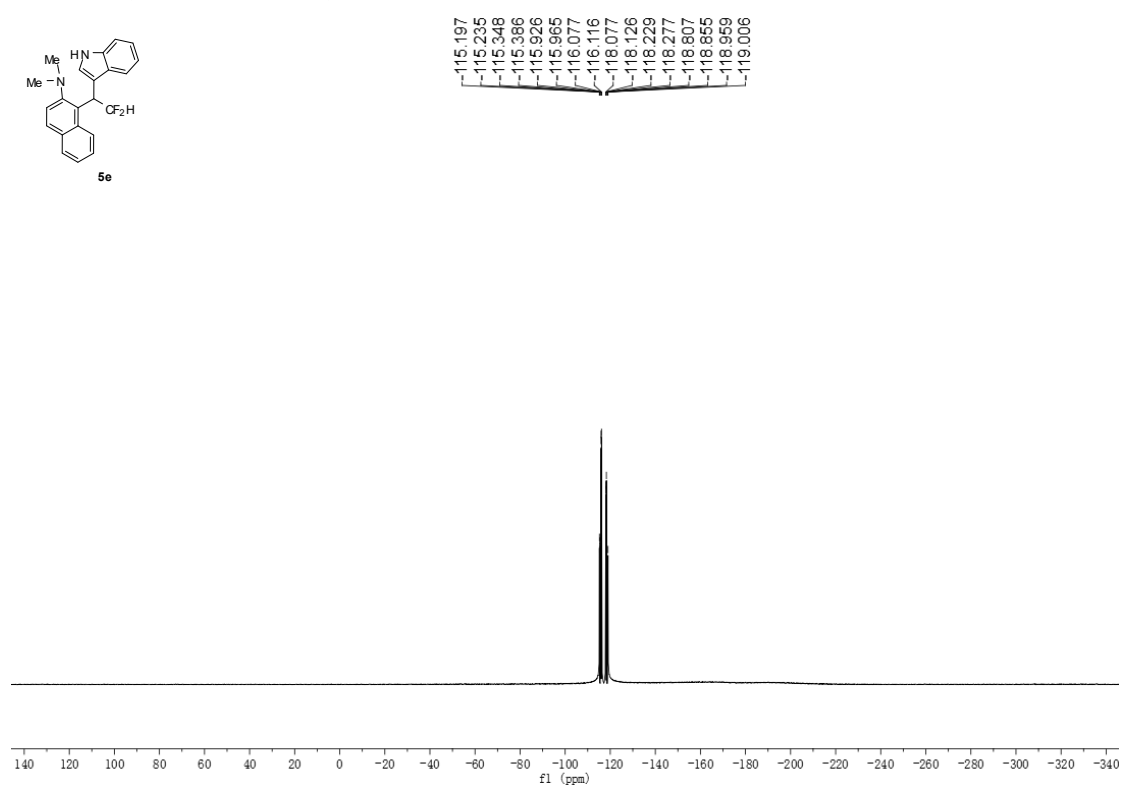

$^{13}\text{C}$  NMR (100 MHz,  $\text{CDCl}_3$ ) of **5e**

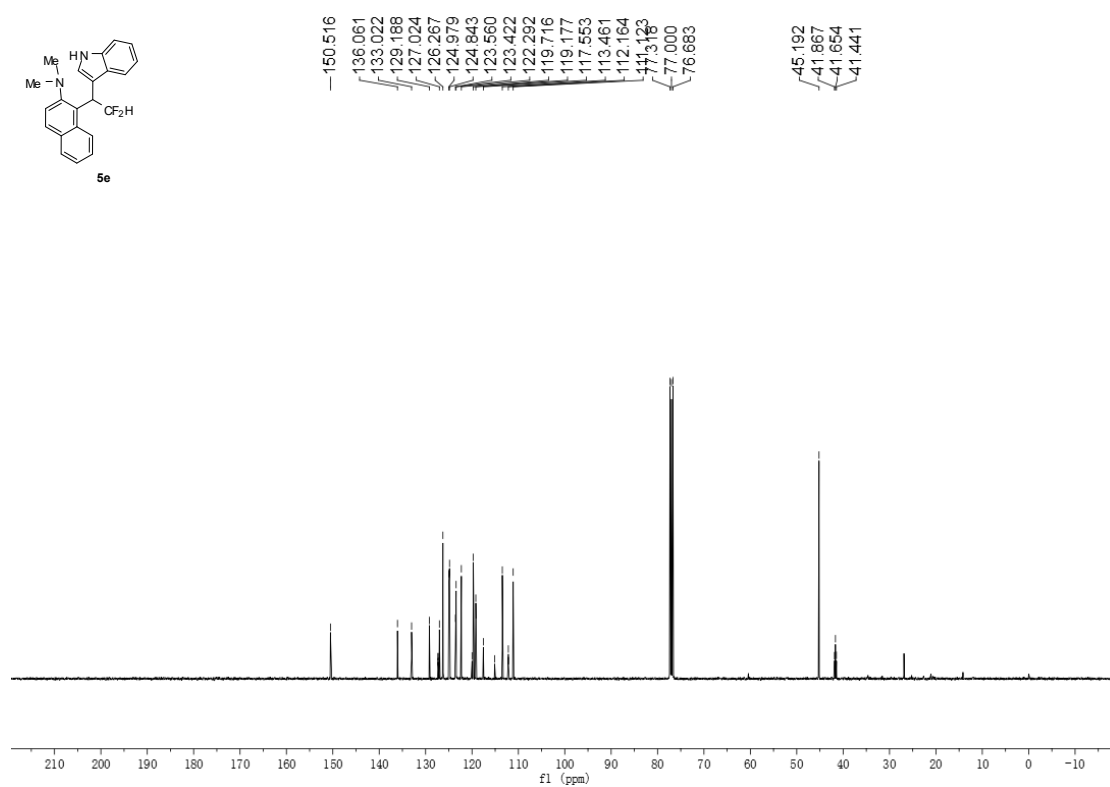

$^1\text{H}$  NMR (400 MHz,  $\text{CDCl}_3$ ) of **5f**

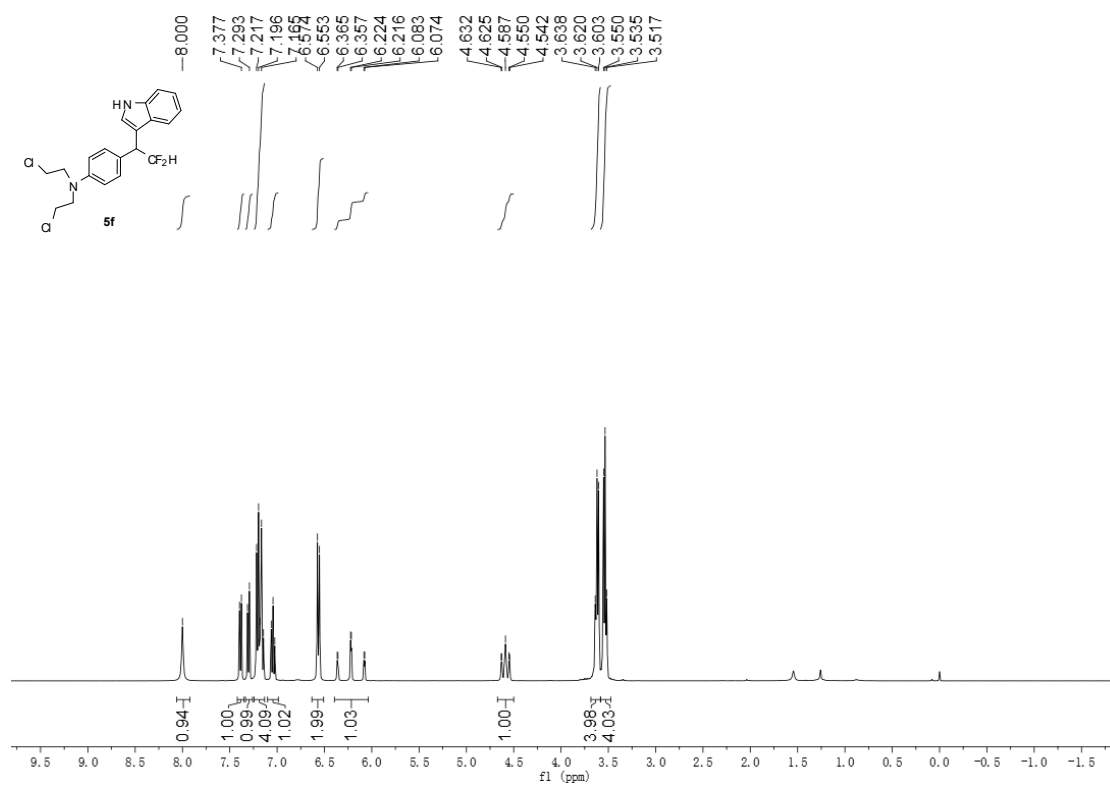

<sup>19</sup>F NMR (376 MHz, CDCl<sub>3</sub>) of **5f**

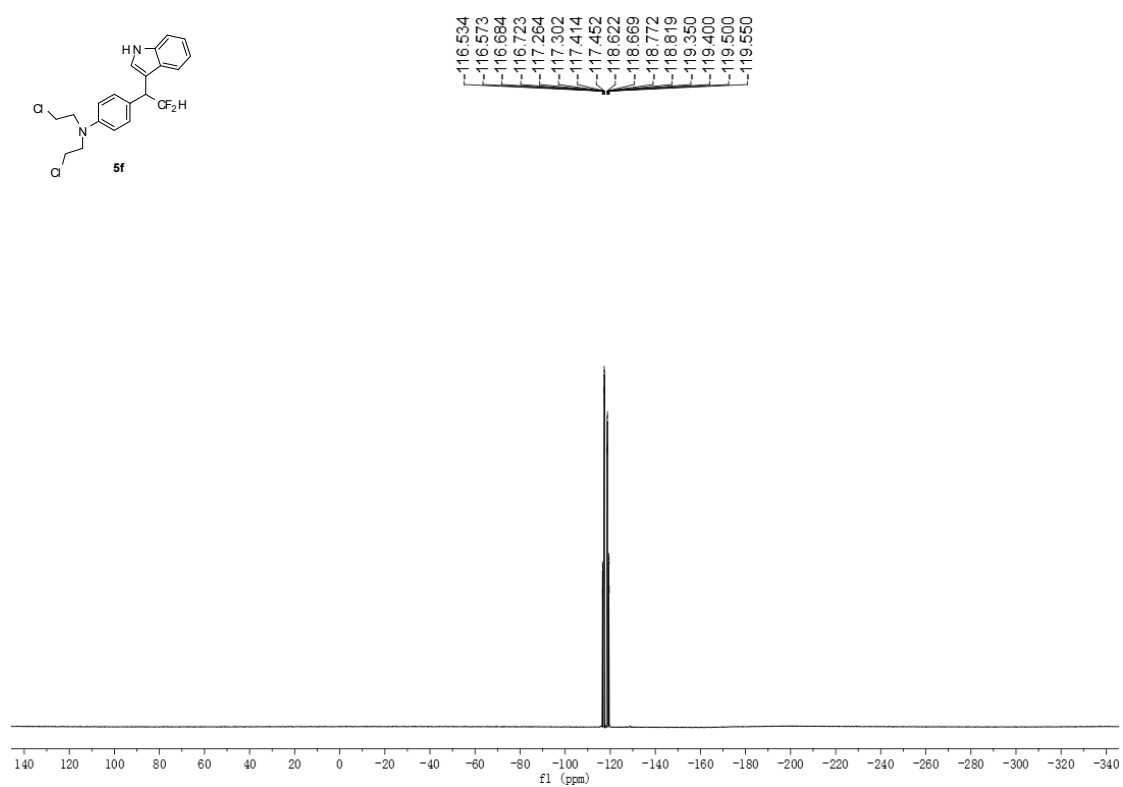

<sup>13</sup>C NMR (100 MHz, CDCl<sub>3</sub>) of **5f**

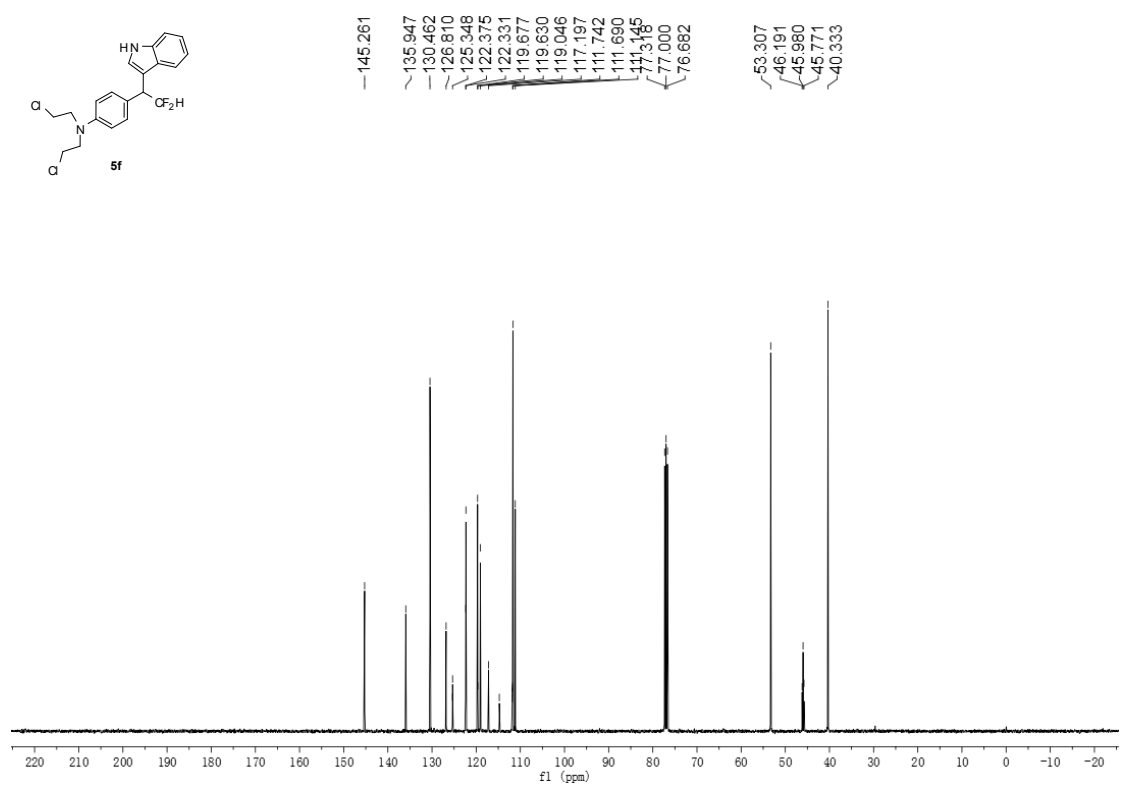

<sup>1</sup>H NMR (400 MHz, CDCl<sub>3</sub>) of **5g**

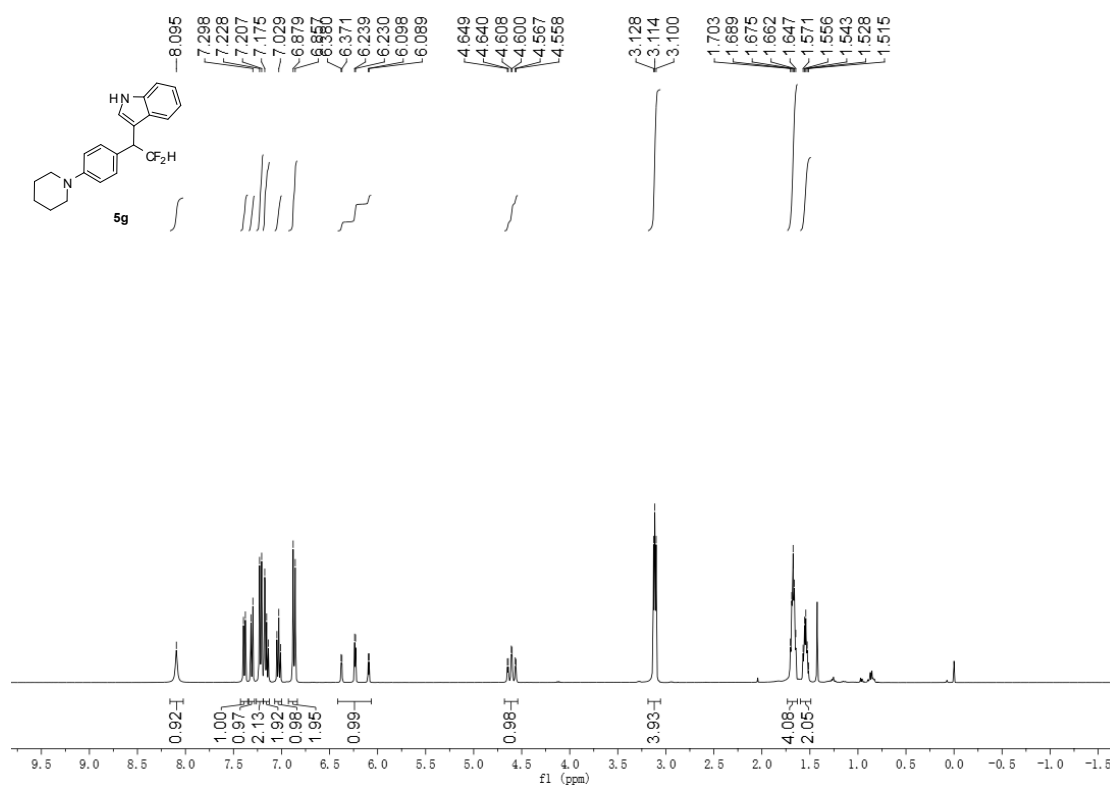

<sup>19</sup>F NMR (376 MHz, CDCl<sub>3</sub>) of **5g**

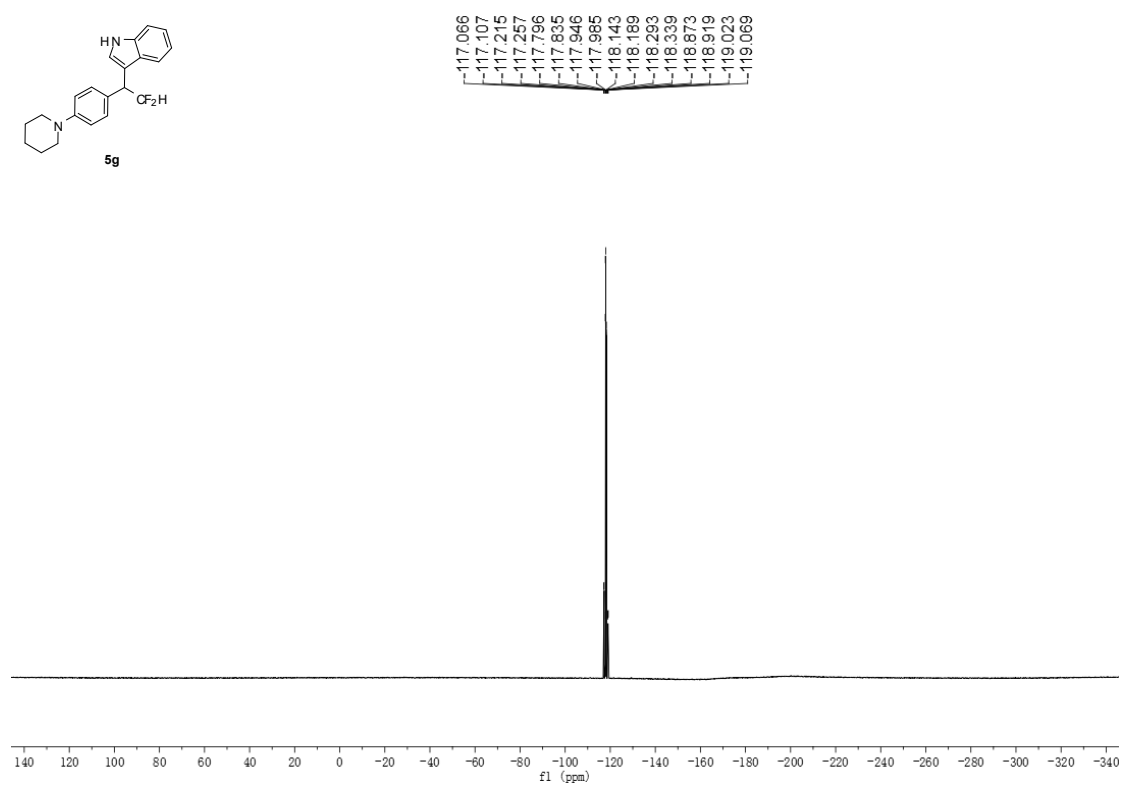

$^{13}\text{C}$  NMR (100 MHz,  $\text{CDCl}_3$ ) of **5g**

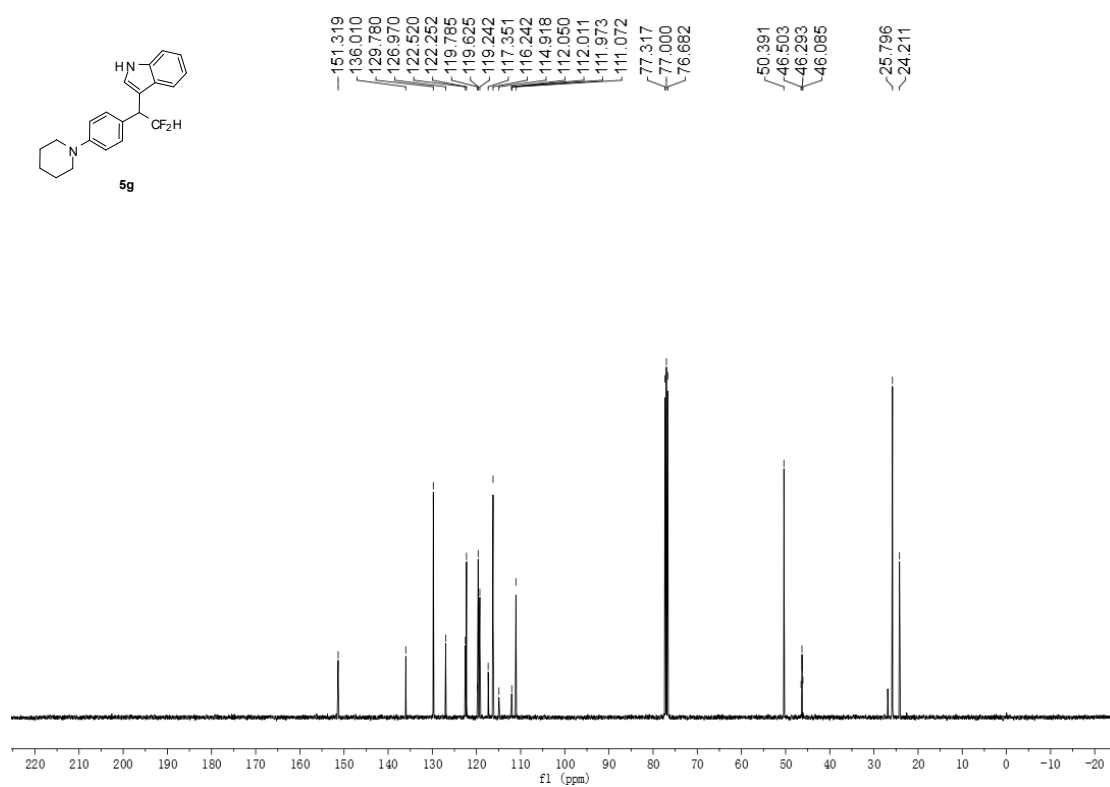

$^1\text{H}$  NMR (400 MHz,  $\text{CDCl}_3$ ) of **5h**

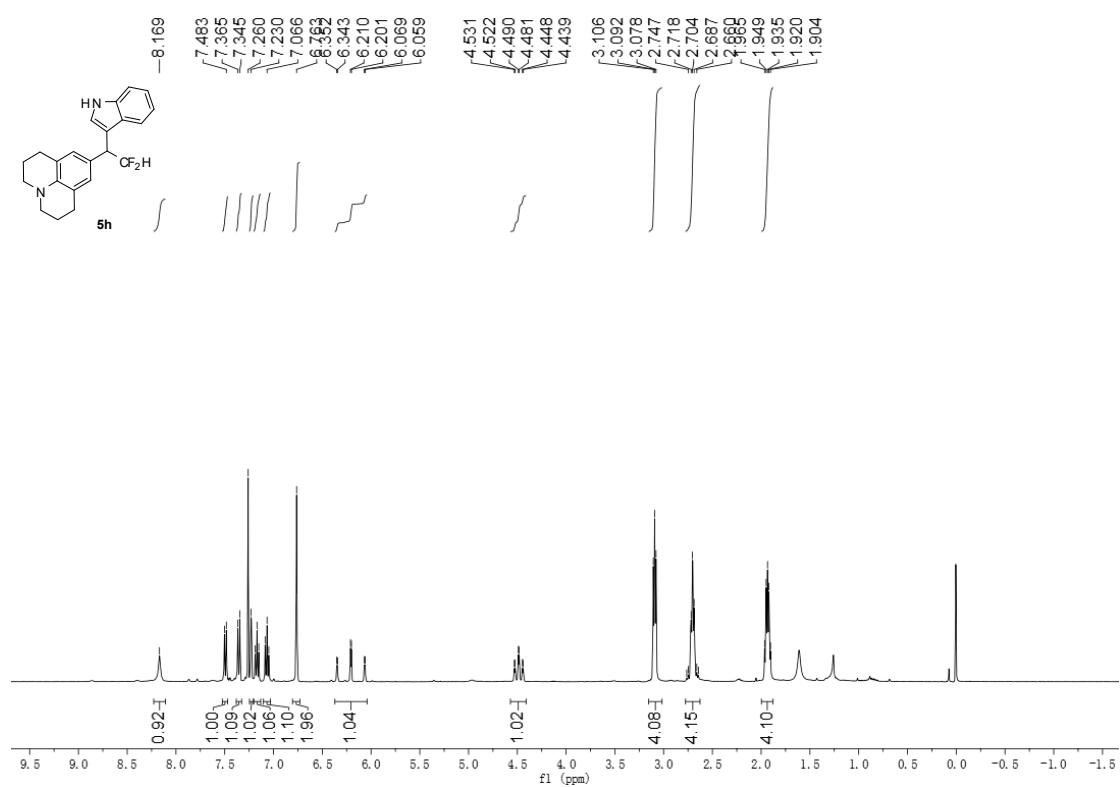



<sup>19</sup>F NMR (376 MHz, CDCl<sub>3</sub>) of **5h**

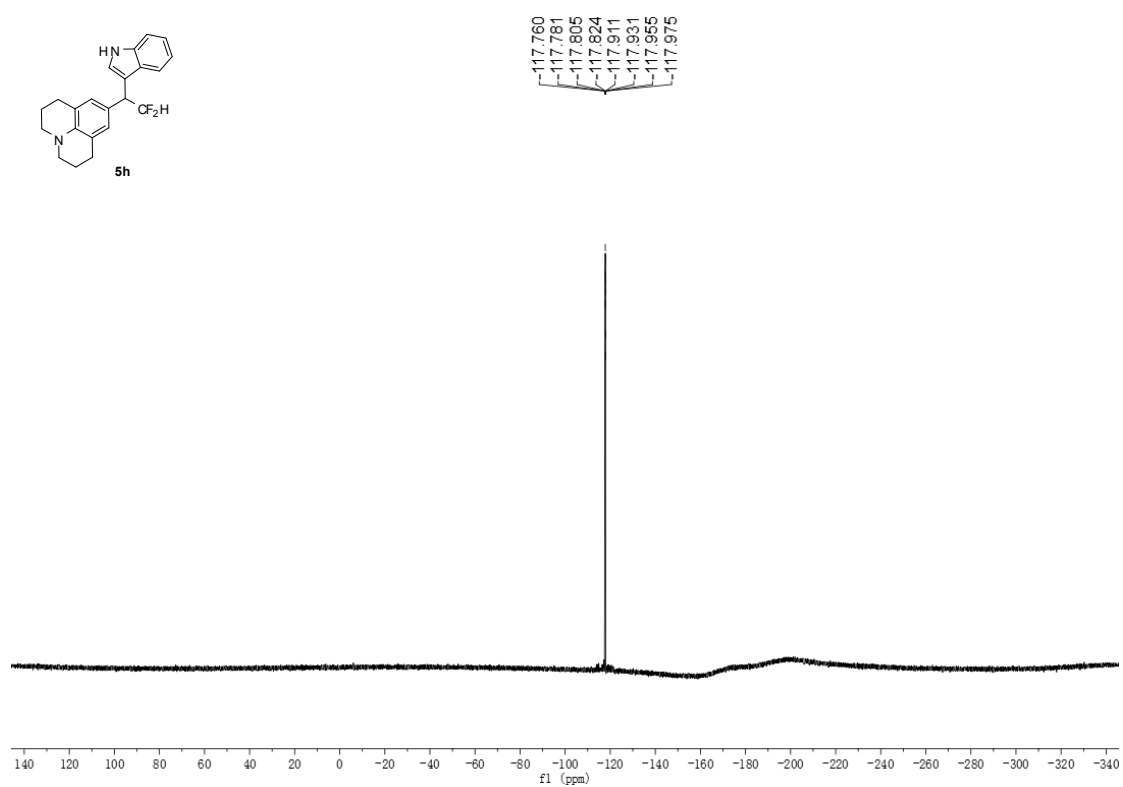

<sup>13</sup>C NMR (100 MHz, CDCl<sub>3</sub>) of **5h**

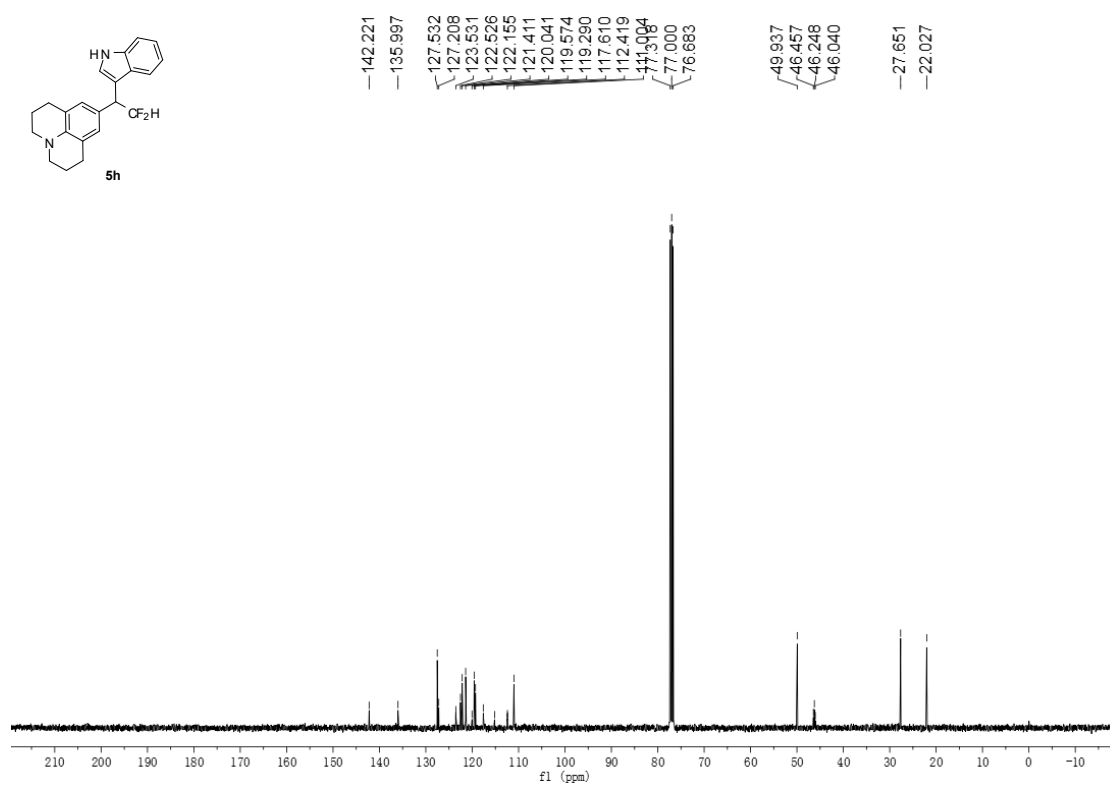

<sup>1</sup>H NMR (400 MHz, CDCl<sub>3</sub>) of **5i**

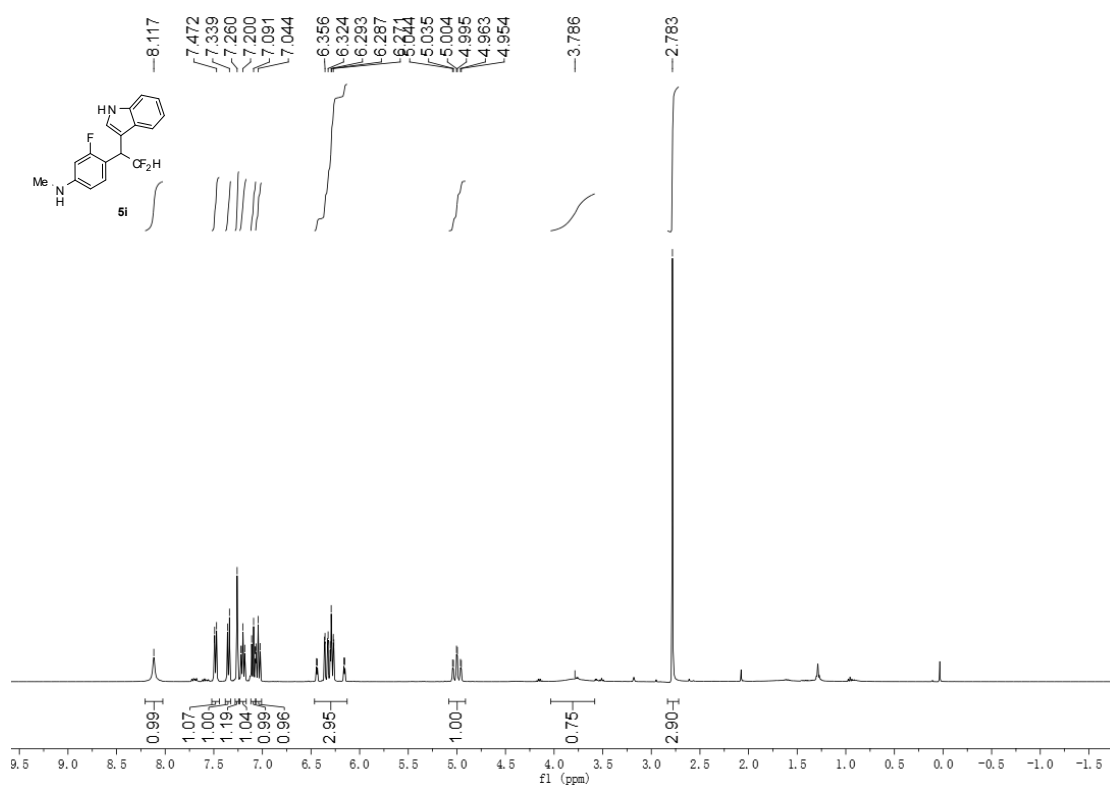

<sup>19</sup>F NMR (376 MHz, CDCl<sub>3</sub>) of **5i**

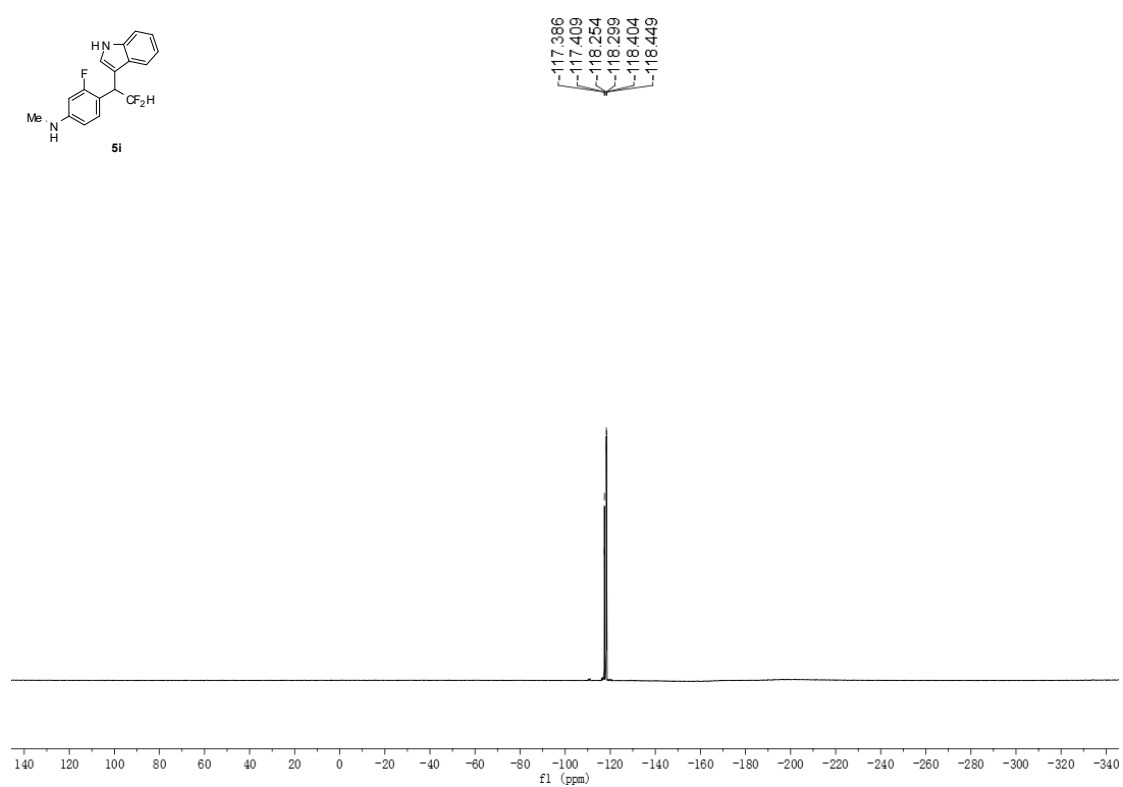

$^{13}\text{C}$  NMR (100 MHz,  $\text{CDCl}_3$ ) of **4i**

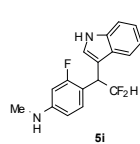

163.072  
160.653  
150.341  
150.229  
135.880  
131.006  
126.889  
122.640  
122.308  
119.699  
111.078  
108.693  
99.888  
98.493  
77.317  
77.000  
76.682  
39.232  
39.014  
38.779  
30.486

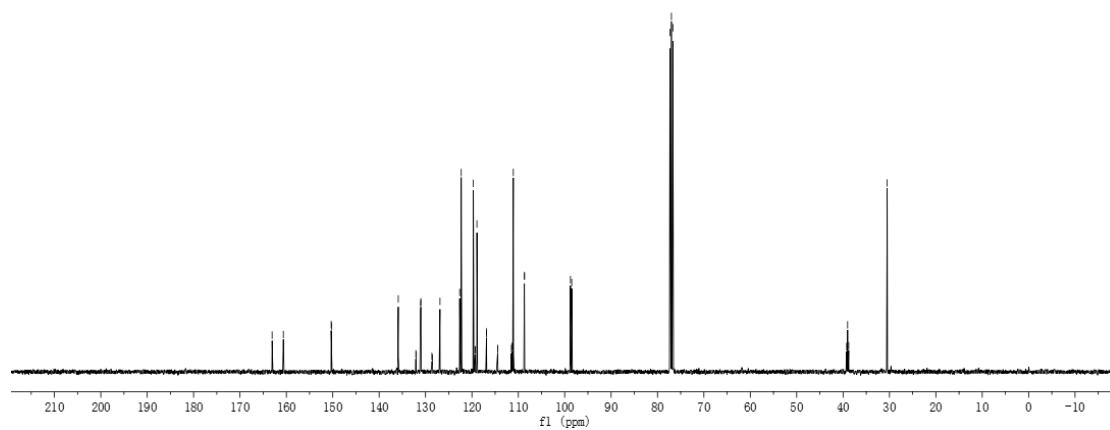

$^1\text{H}$  NMR (400 MHz,  $\text{CDCl}_3$ ) of **5j**

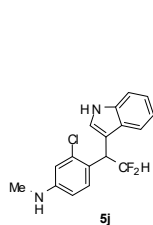

8.006  
7.280  
7.228  
7.224  
7.143  
6.839  
6.540  
6.339  
6.330  
6.198  
6.189  
6.057  
6.048  
4.591  
4.583  
4.555  
4.546  
4.537  
4.509  
4.501  
4.277  
2.808

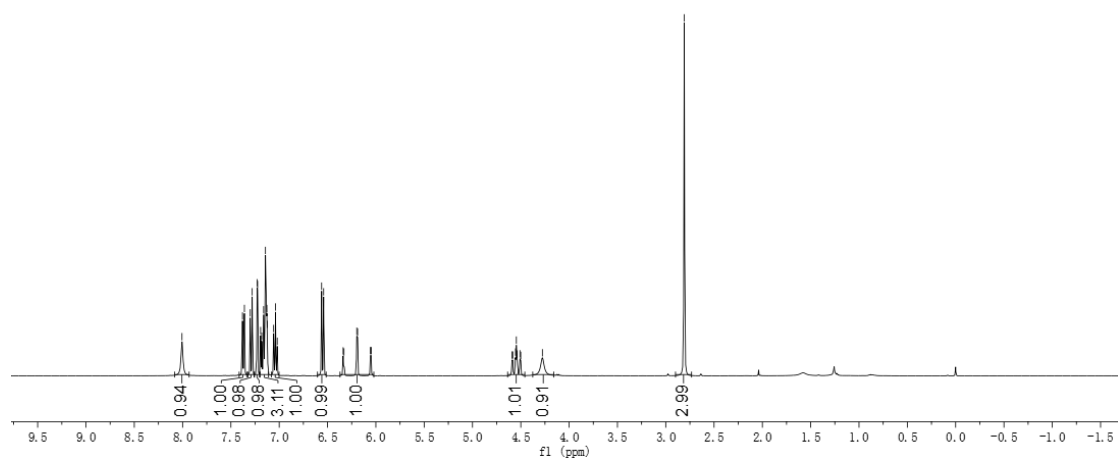

<sup>19</sup>F NMR (376 MHz, CDCl<sub>3</sub>) of **5j**

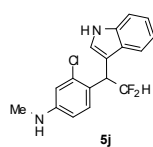

116.640  
116.678  
116.789  
116.828  
117.369  
117.407  
117.519  
117.557  
118.878  
118.927  
119.028  
119.077  
119.609  
119.658  
119.758  
119.808

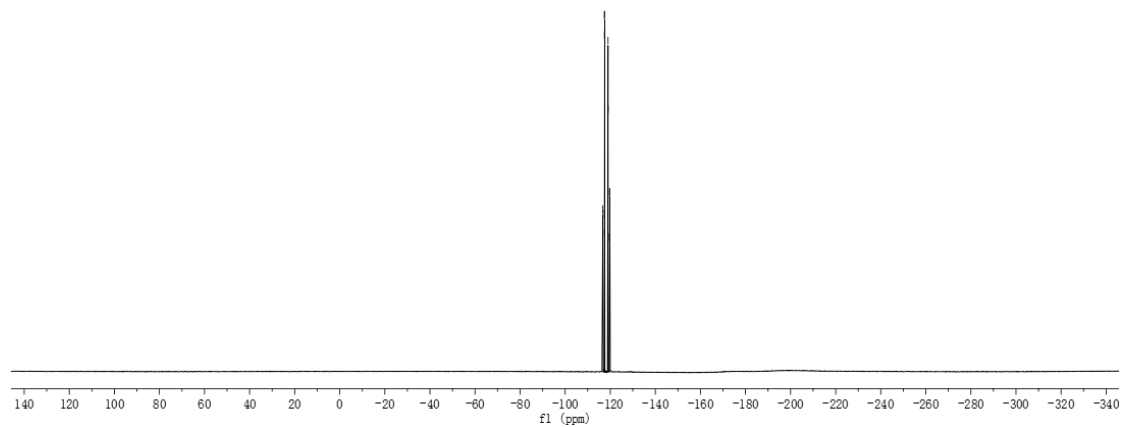

<sup>13</sup>C NMR (100 MHz, CDCl<sub>3</sub>) of **5j**

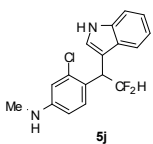

144.246  
135.853  
129.564  
128.739  
126.747  
125.092  
122.416  
122.349  
119.704  
119.456  
118.980  
118.902  
117.022  
111.153  
110.416  
77.000  
76.683

46.140  
45.930  
45.719

30.291

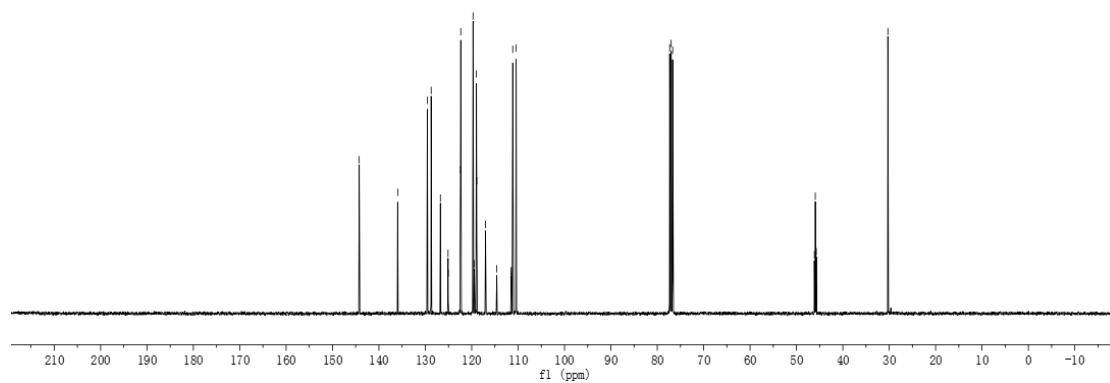

<sup>1</sup>H NMR (400 MHz, CDCl<sub>3</sub>) of **5k**

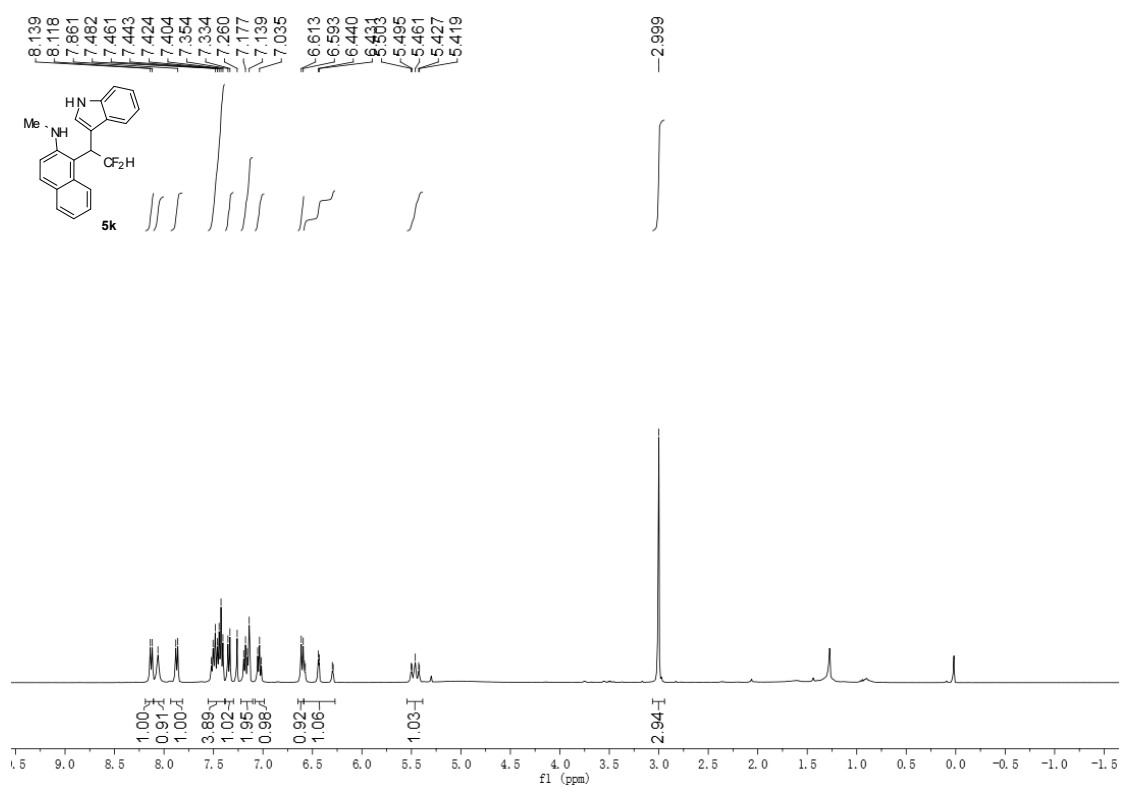

<sup>19</sup>F NMR (376 MHz, CDCl<sub>3</sub>) of **5k**

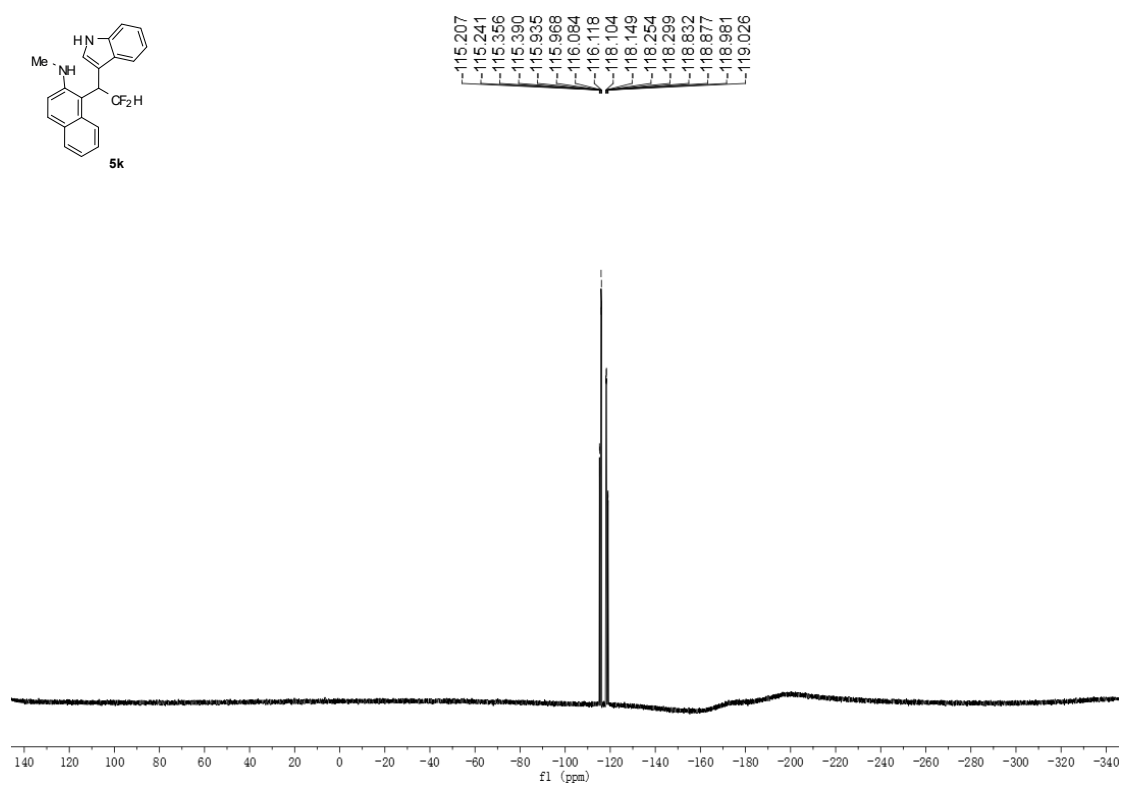

$^{13}\text{C}$  NMR (100 MHz,  $\text{CDCl}_3$ ) of **5k**

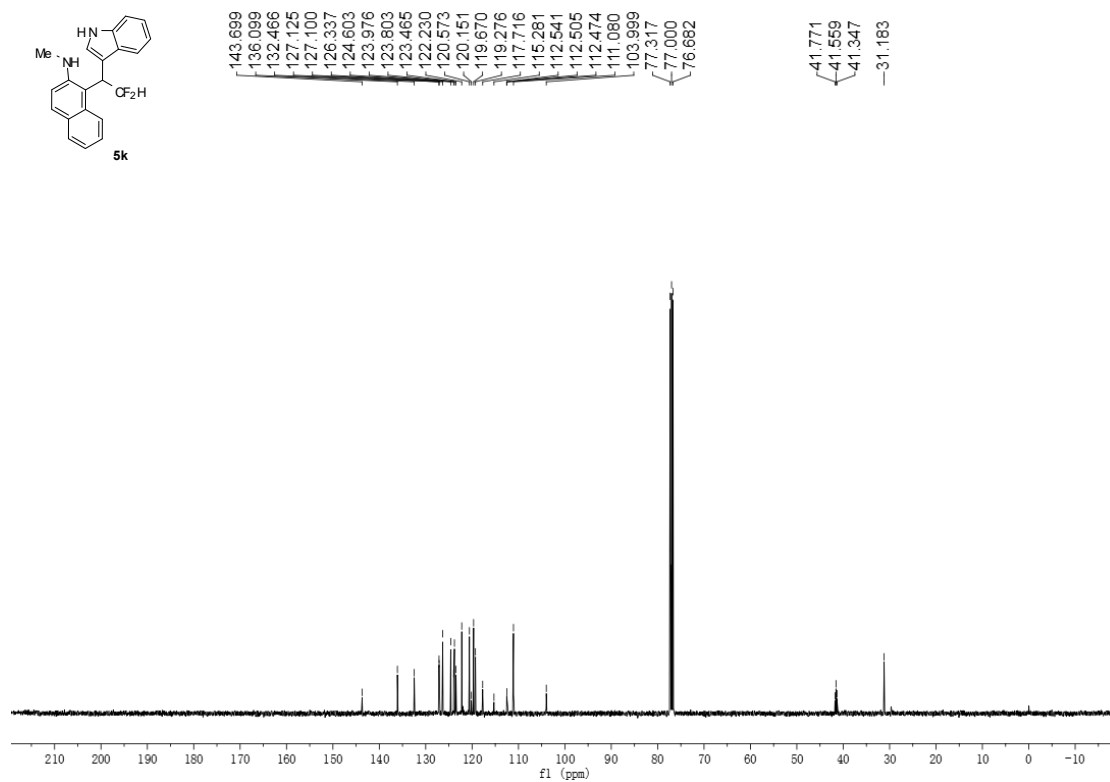

$^1\text{H}$  NMR (400 MHz,  $\text{CDCl}_3$ ) of **5l**

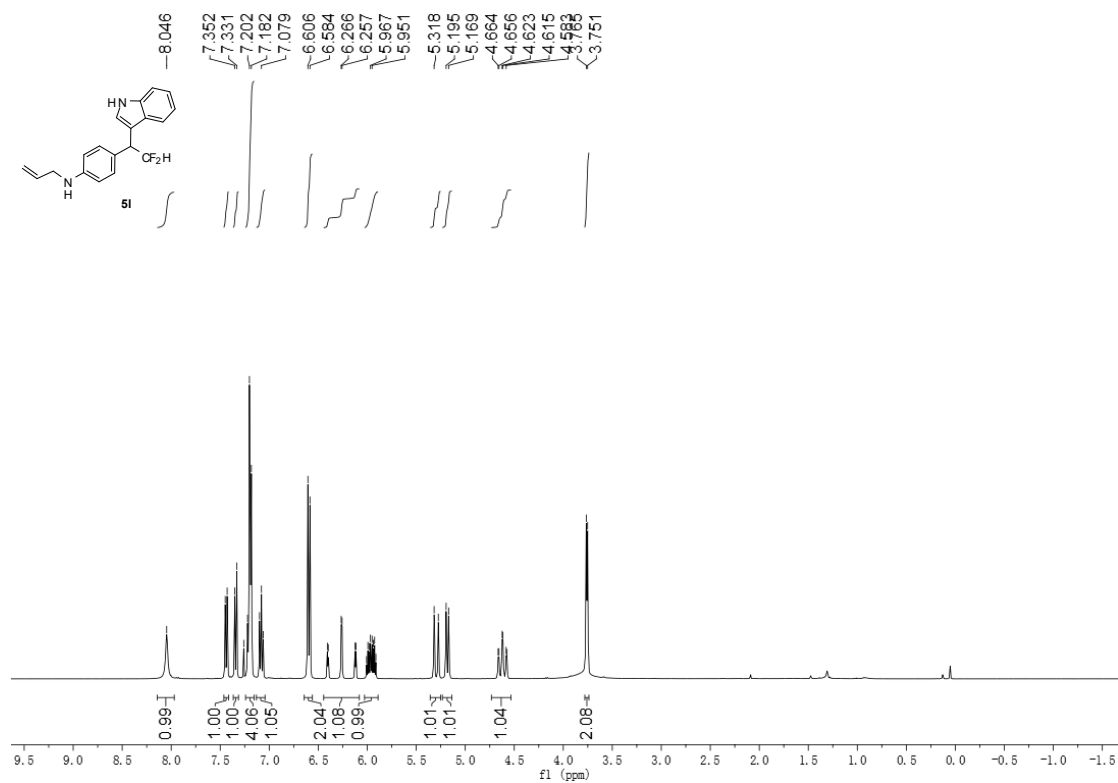

<sup>19</sup>F NMR (376 MHz, CDCl<sub>3</sub>) of **51**

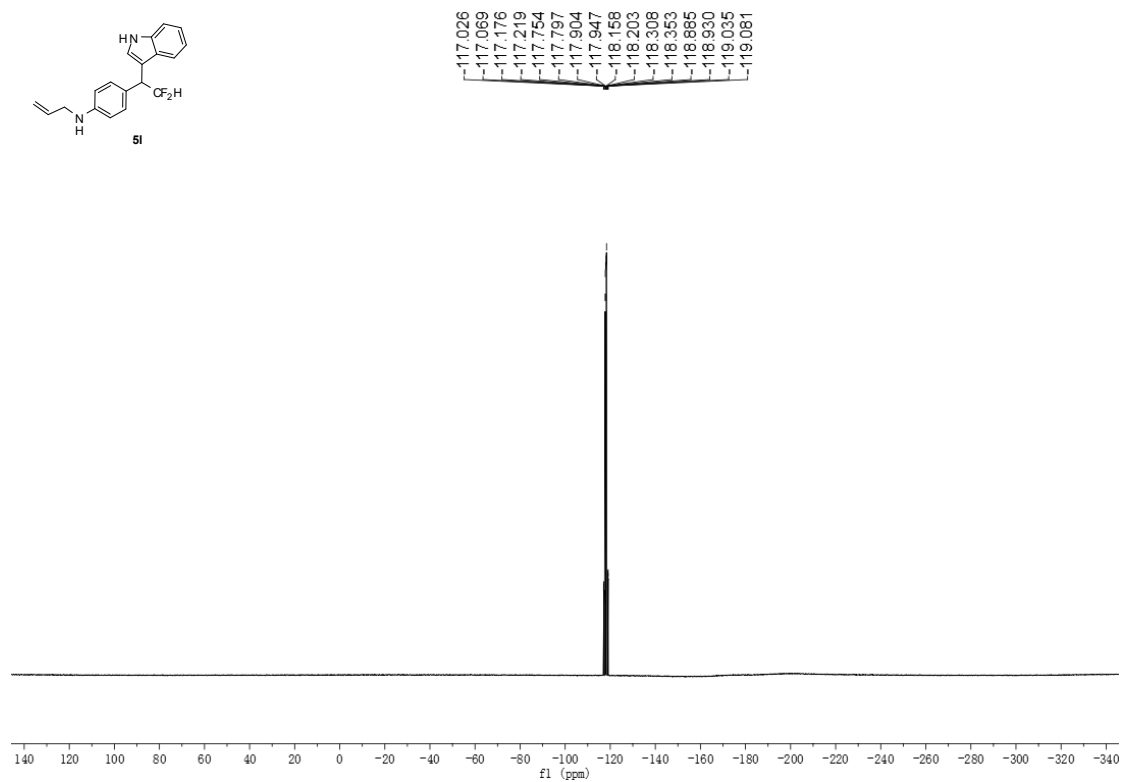

<sup>13</sup>C NMR (100 MHz, CDCl<sub>3</sub>) of **51**

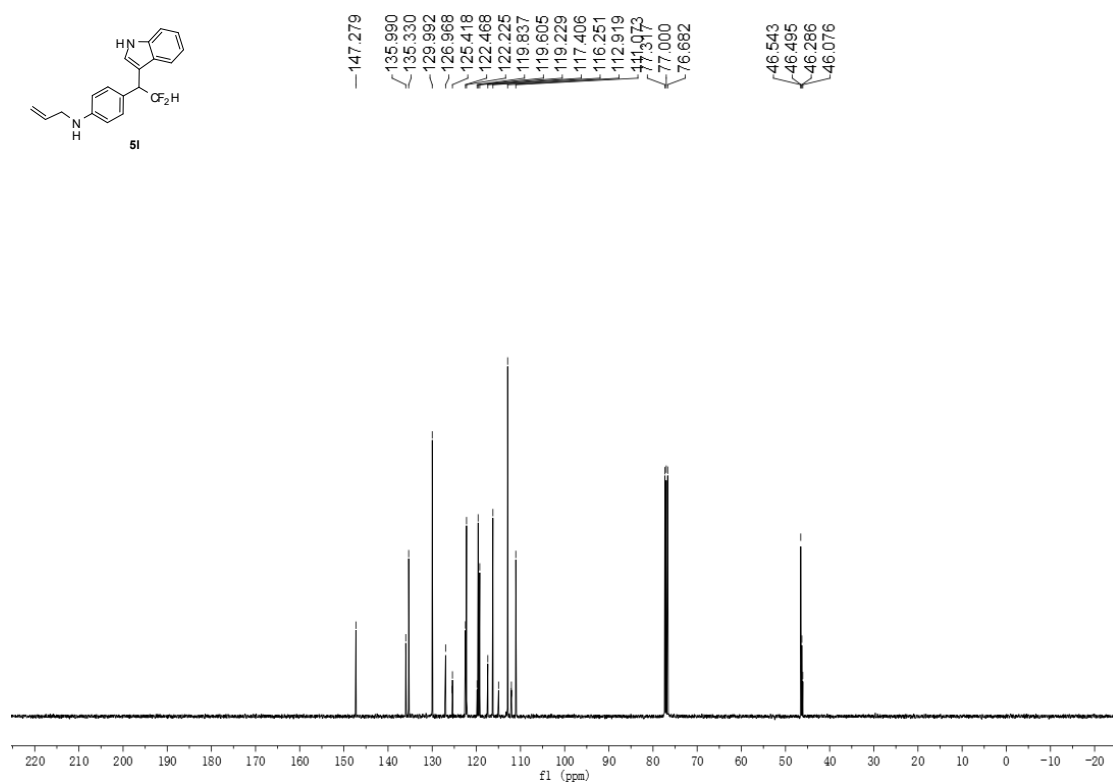

<sup>1</sup>H NMR (400 MHz, CDCl<sub>3</sub>) of **5m**

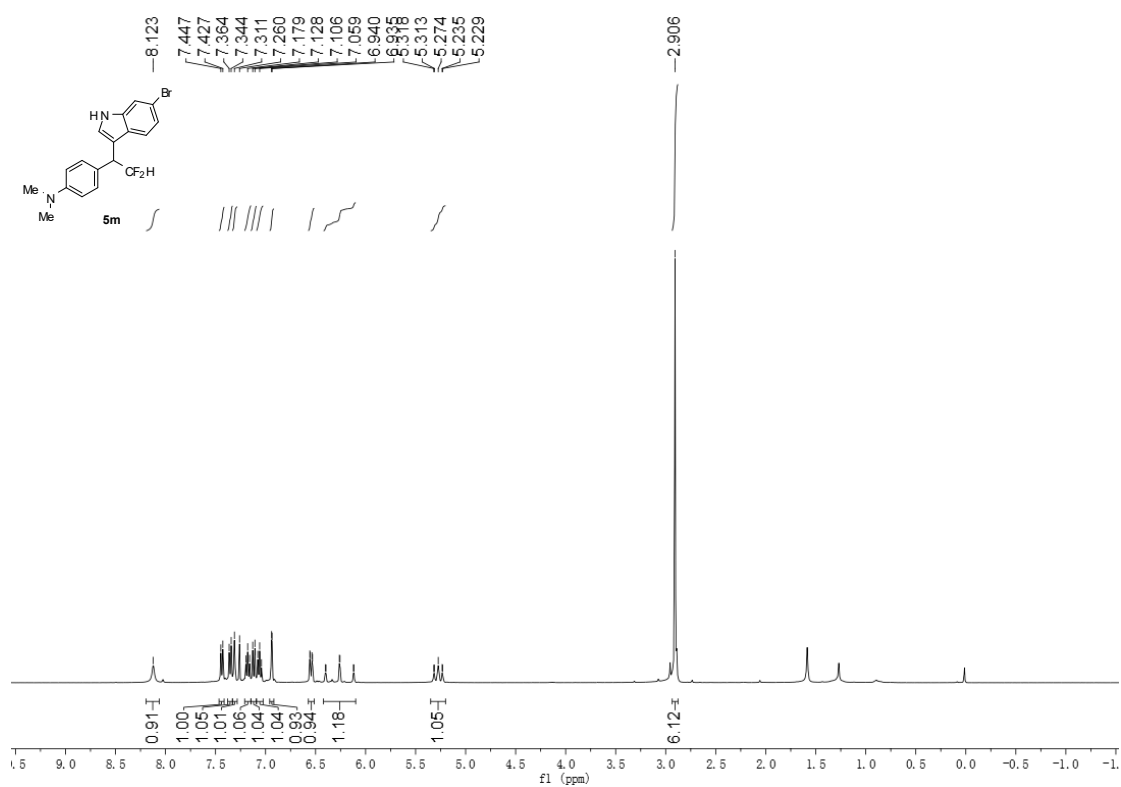

<sup>19</sup>F NMR (376 MHz, CDCl<sub>3</sub>) of **5m**

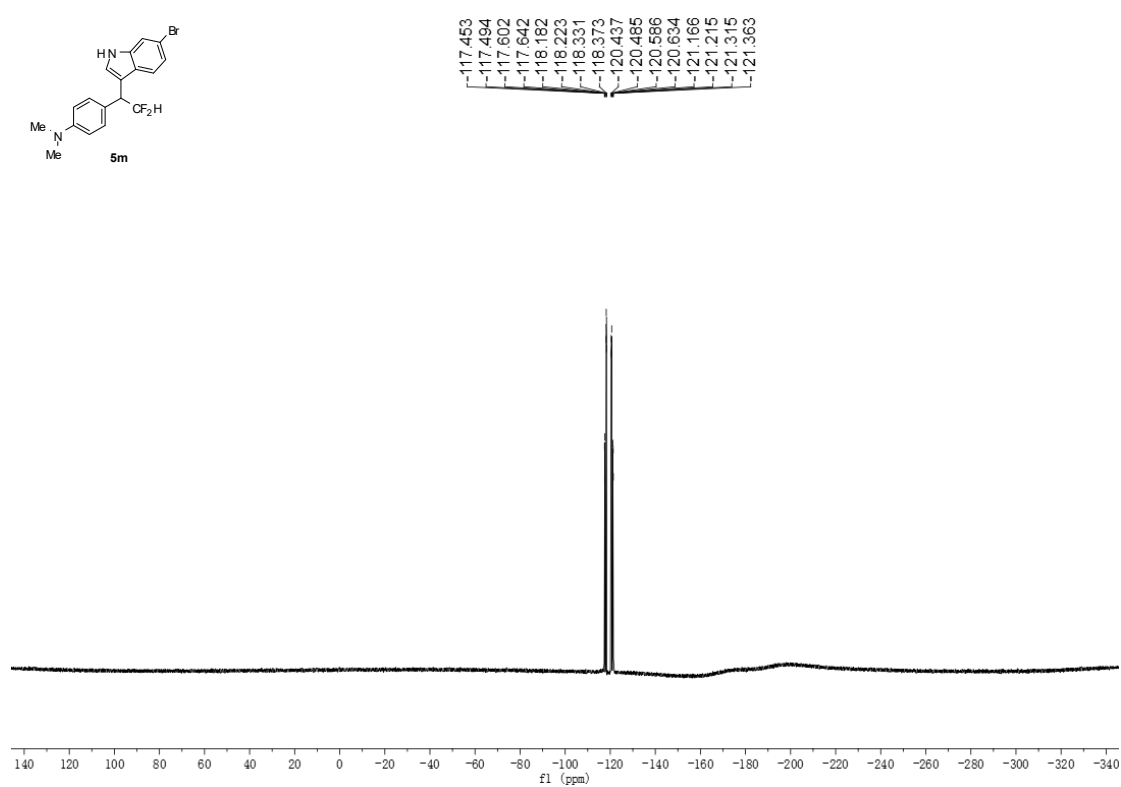



$^{13}\text{C}$  NMR (100 MHz,  $\text{CDCl}_3$ ) of **5m**

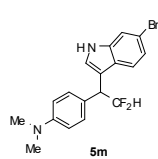

150.481  
135.881  
130.822  
127.065  
125.872  
122.875  
122.457  
122.340  
119.748  
119.465  
119.253  
117.026  
115.746  
111.747  
111.592  
77.000  
76.682  
44.878  
44.667  
44.457  
40.232

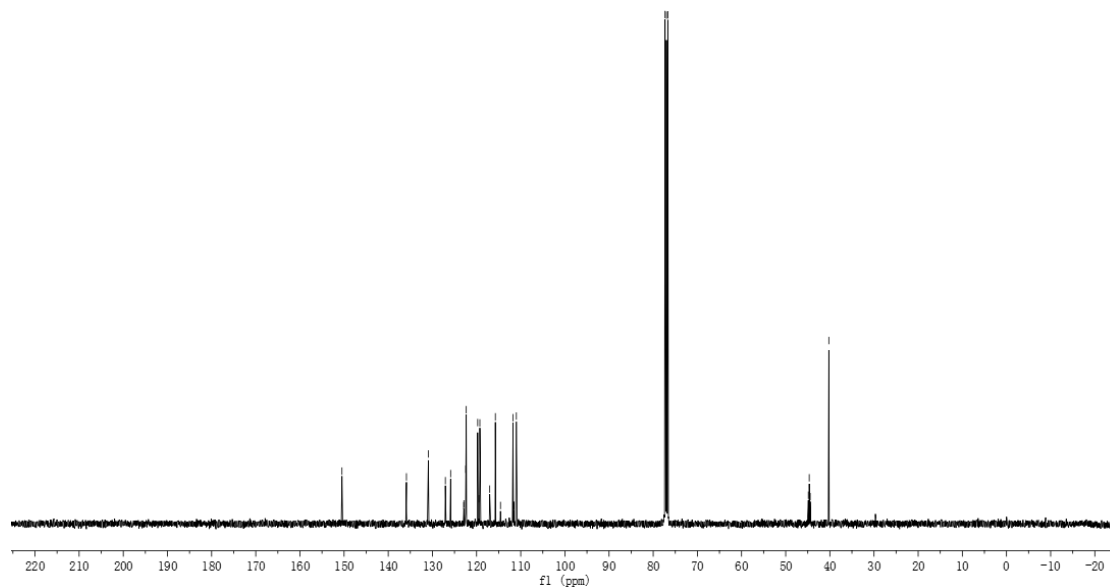

$^1\text{H}$  NMR (400 MHz,  $\text{CDCl}_3$ ) of **5n**

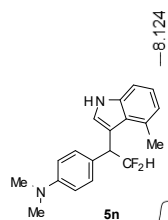

8.124  
7.283  
7.215  
7.191  
7.169  
7.089  
7.080  
6.817  
6.799  
6.720  
6.715  
6.703  
5.698  
5.670  
5.019  
4.990  
4.982  
4.977  
4.969  
4.940  
4.933

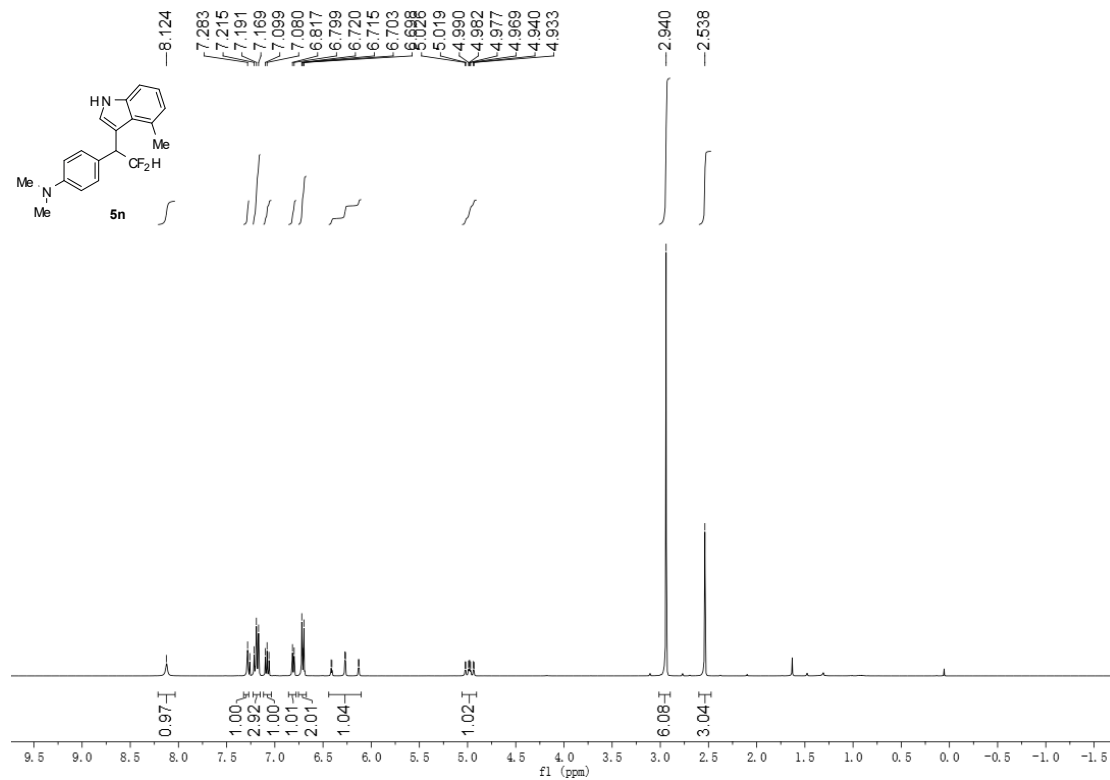

<sup>19</sup>F NMR (376 MHz, CDCl<sub>3</sub>) of **5n**

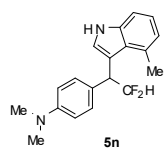

114.788  
114.826  
114.938  
114.976  
115.516  
115.553  
115.666  
115.703  
119.567  
119.619  
119.717  
119.770  
120.292  
120.346  
120.443  
120.496

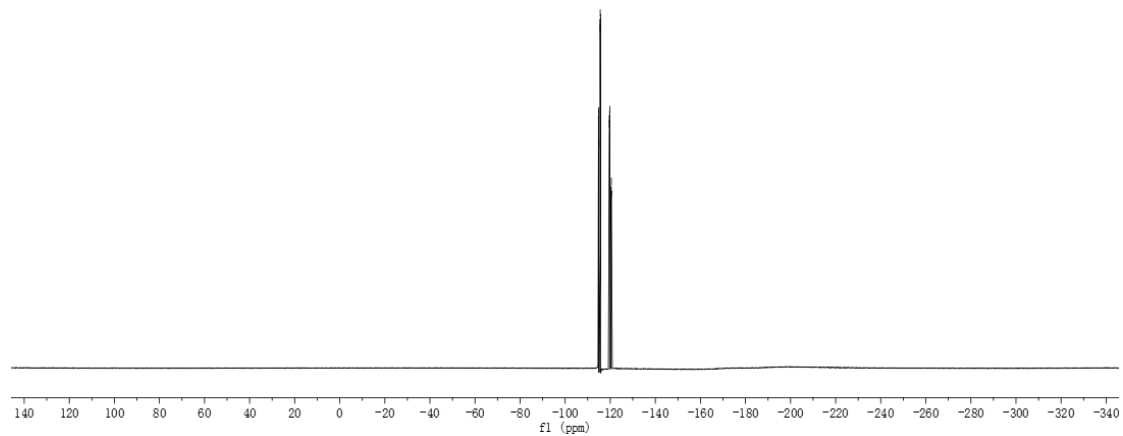

<sup>13</sup>C NMR (100 MHz, CDCl<sub>3</sub>) of **5n**

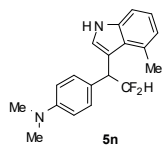

149.771  
136.301  
130.661  
130.278  
125.466  
124.811  
122.341  
122.285  
121.500  
119.918  
117.487  
115.055  
112.432  
109.074  
77.318  
77.000  
76.682  
46.965  
46.760  
46.556  
40.463  
20.509

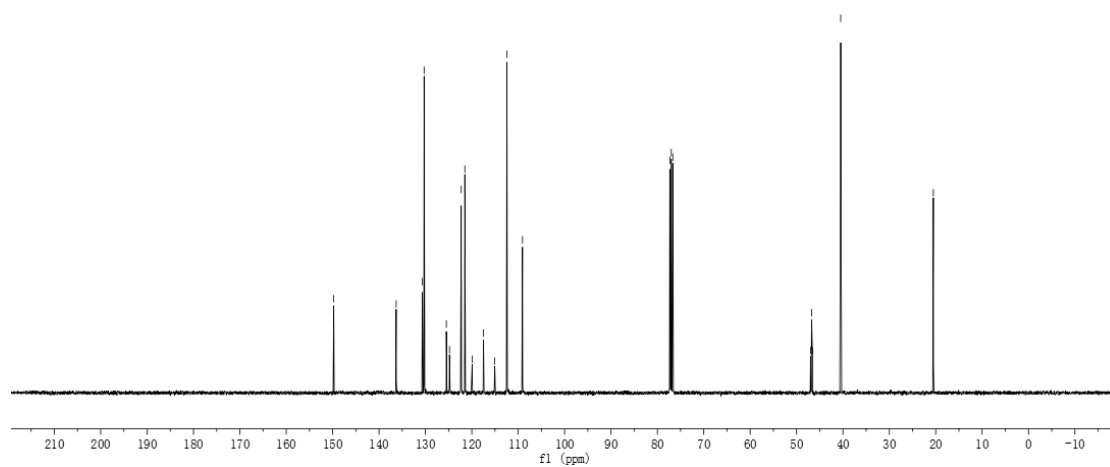

<sup>1</sup>H NMR (400 MHz, CDCl<sub>3</sub>) of **5o**

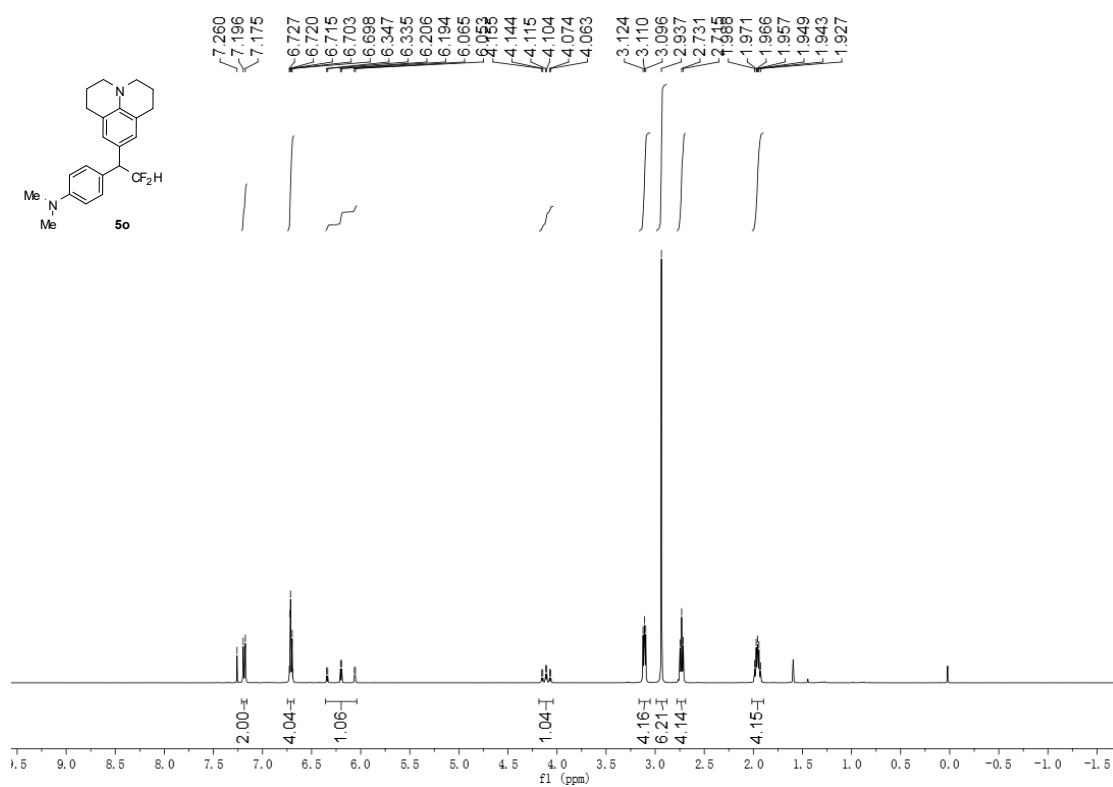

<sup>19</sup>F NMR (376 MHz, CDCl<sub>3</sub>) of **5o**

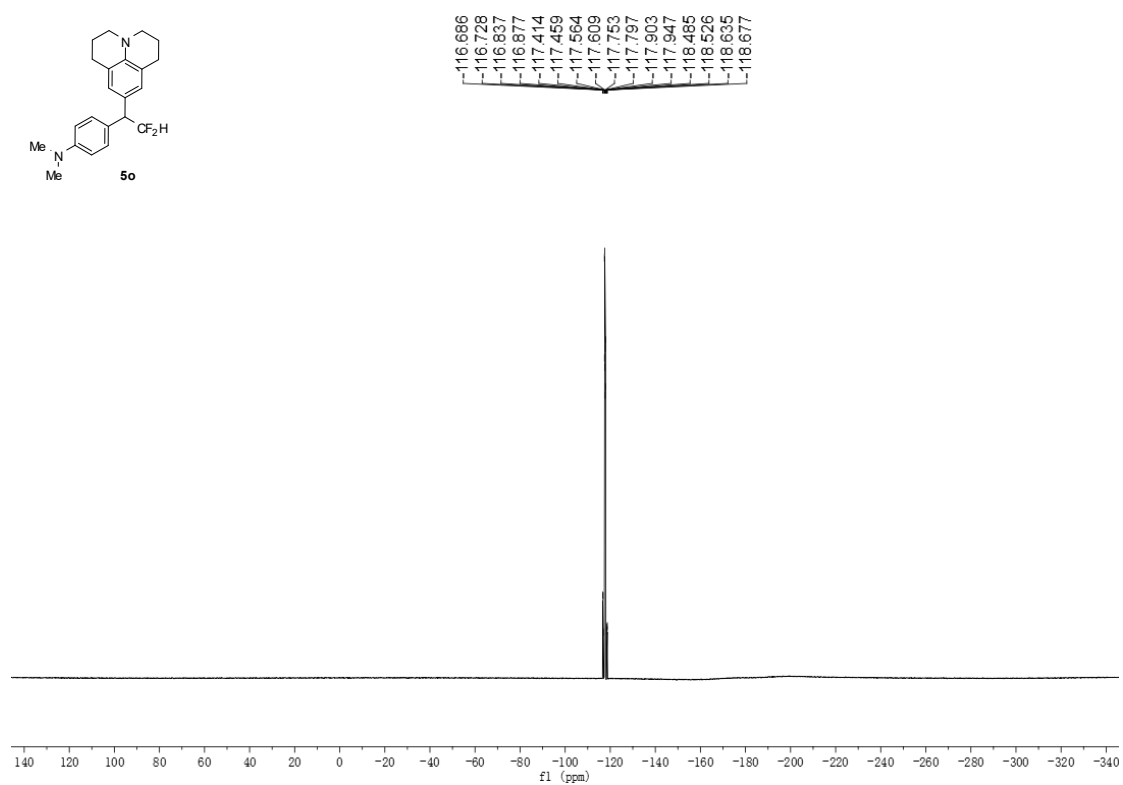

$^{13}\text{C}$  NMR (100 MHz,  $\text{CDCl}_3$ ) of **5o**

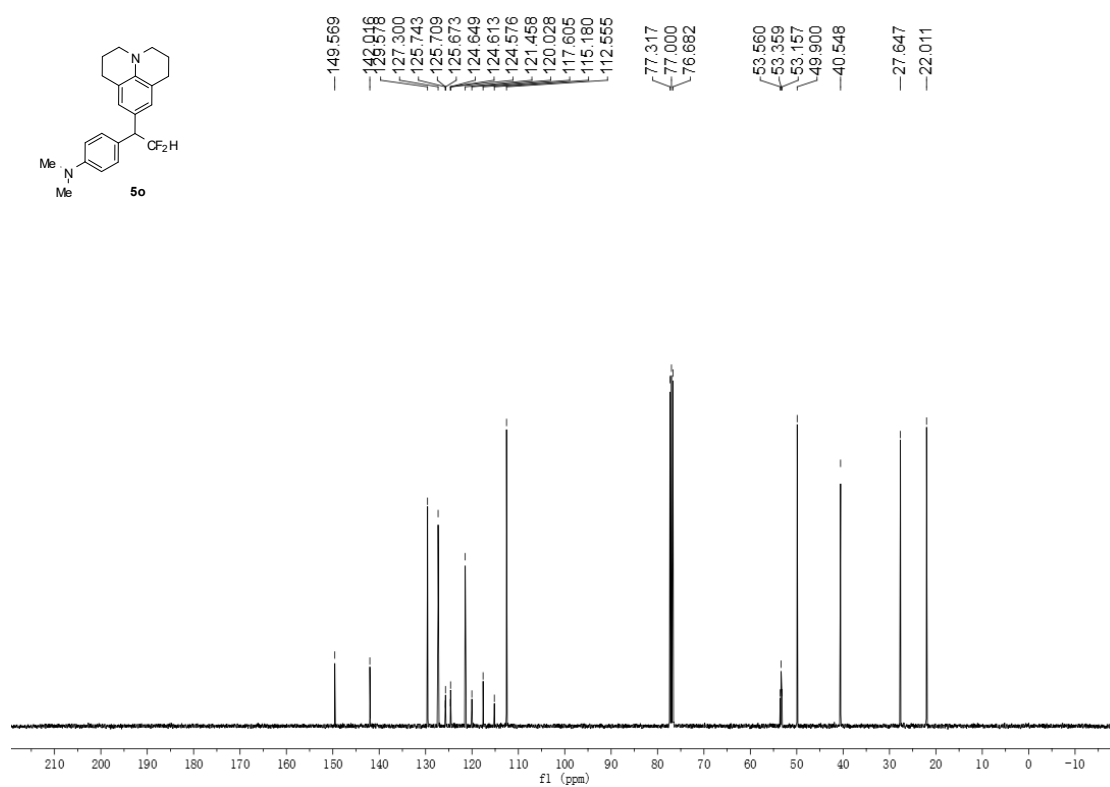

$^1\text{H}$  NMR (400 MHz,  $\text{CDCl}_3$ ) of **6**

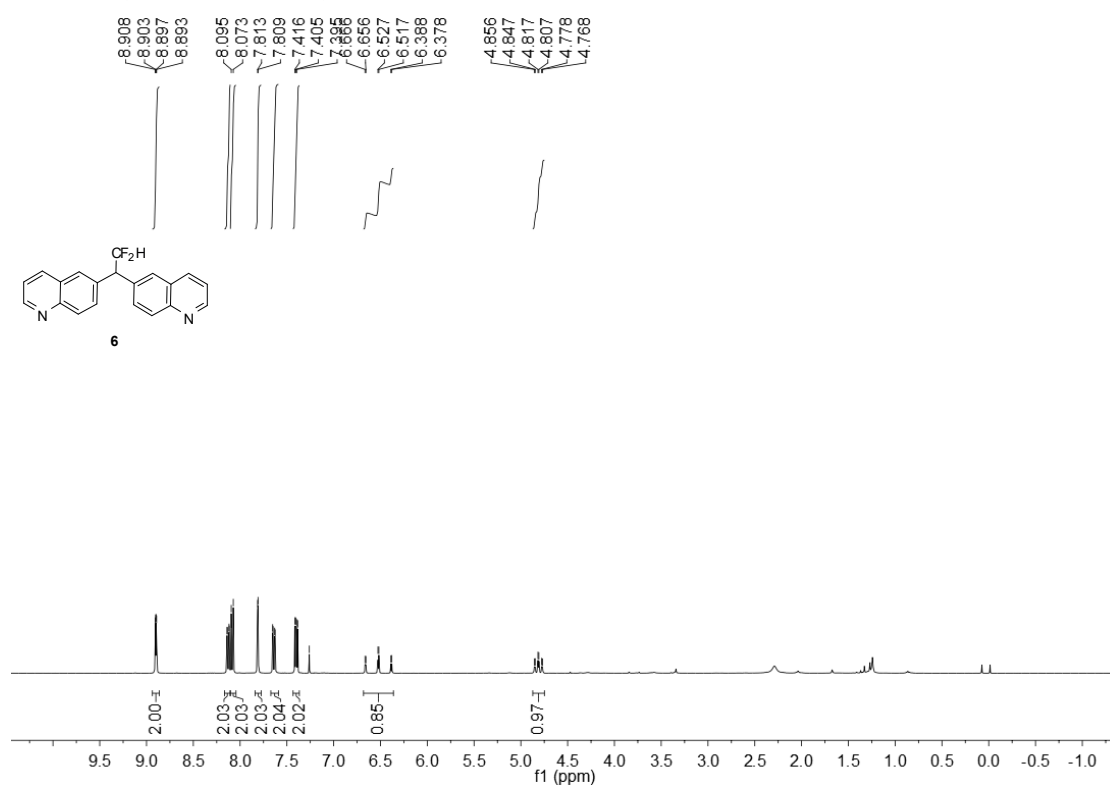

$^{19}\text{F}$  NMR (376 MHz,  $\text{CDCl}_3$ ) of **6**

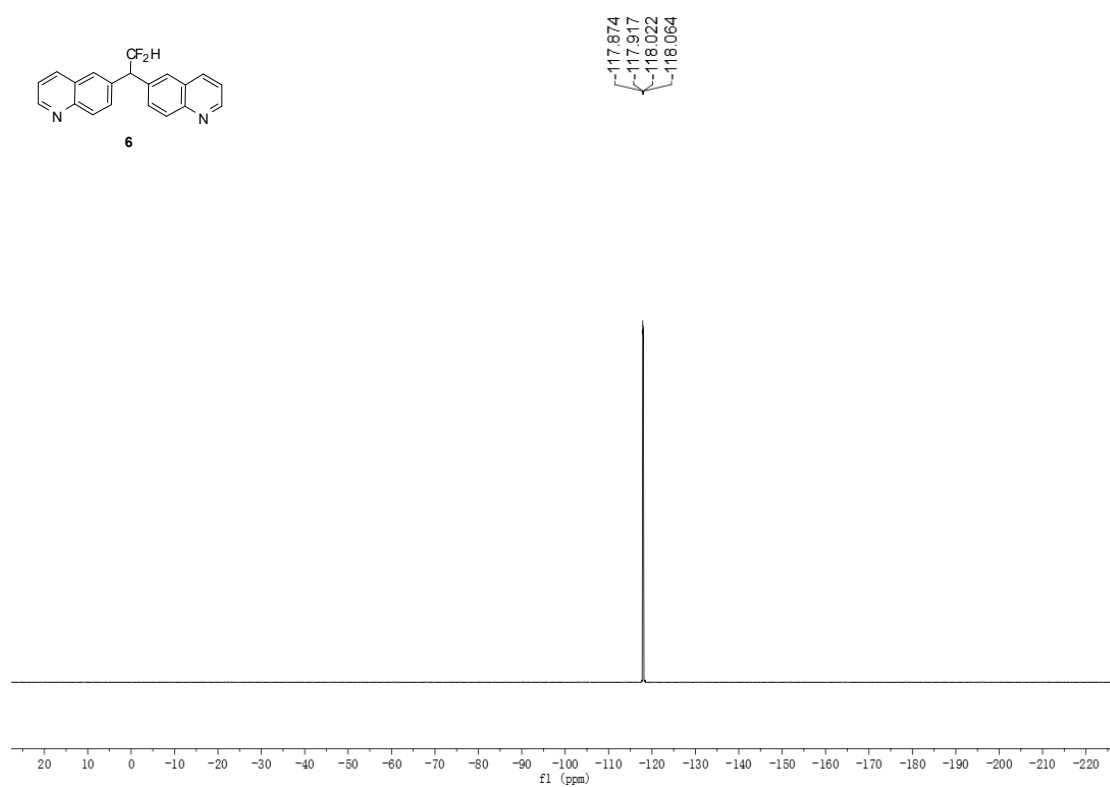

$^{13}\text{C}$  NMR (100 MHz,  $\text{CDCl}_3$ ) of **6**

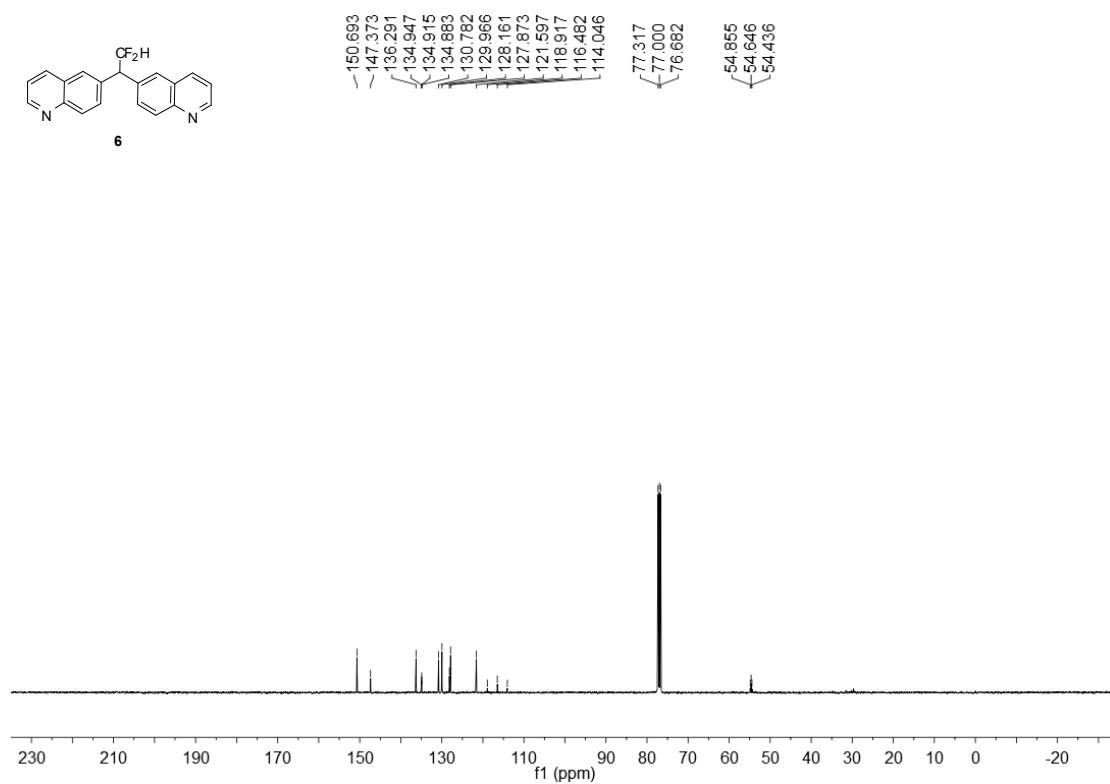

Supplement: d4gc03917c1.pdf [file d4gc03917c1.pdf]
